# Supplementary material
Source: HighWire-hosted journal article supplement (doi:10.1101/rna.057216.116)
Supplement: Supplemental_TableS1.xlsx [file Supplemental_TableS1.xlsx]

## Sheet: Sheet1
Table S1. Branch-seq BP peaks paired 5'SS motifs.
No. mismatches from /GTATGT	0	1	2	3	4	5	6	All	0 or 1 mut	% 0 or 1 mut
153 annotated BPs: winBP	103	35	7	7	1	0	0	153	138	90.2
191 putative novel BPs: winBP	64	62	28	13	18	5	1	191	126	65.97
196 annotated BPs: GEM-BP	105	44	24	16	7	0	0	196	149	76.02
350 putative novel BPs: GEM-BP	61	161	78	34	12	3	1	350	222	63.43
