# Supplementary material
Source: HighWire-hosted journal article supplement (doi:10.1101/rna.057216.116)
Supplement: Supplemental_TableS2.xlsx [file Supplemental_TableS2.xlsx]

## Sheet: table_s2_new.txt
Table S2: GEM-BP and winBP peaks
chr	bp_nt	strand	5ss_bp_pair	winBP	GEM-BP	bp_anno	5ss_anno	5ss_mm	5ss	u_a	u_n	cnBP	lcnBP	hcnBP	Qin_novel	best_bp_in15	best_bp_mm	best_bp_nt_in15
chrI	30553	-	chrI:30553:30626:-	0	1	0	0	3	AAGTGT	0	1	0	0	0	0	GATTAAC	2	30553
chrI	31426	-	chrI:31426:31464:-	0	1	0	0	3	ATAACT	0	1	0	0	0	0	CATTAAC	2	31426
chrI	78465	+	chrI:78419:78465:+	0	1	0	0	2	GTGTGG	0	1	0	0	0	0	TACTAAC	0	78465
chrI	87439	+	chrI:87389:87439:+	1	1	1	1	1	GTAAGT	1	0	0	0	0	0	TACTAAC	0	87439
chrI	126072	+	chrI:125985:126072:+	0	1	0	0	1	GTATGG	0	1	1	0	1	0	CATTAAC	2	126072
chrI	134872	-	chrI:134872:134944:-	0	1	0	0	1	GTAAGT	0	1	1	0	1	0	CACTAAC	1	134872
chrI	142338	+	chrI:142256:142338:+	1	0	0	1	0	GTATGT	0	0	0	0	0	0	AACTAAT	2	142344
chrI	142344	+	chrI:142256:142344:+	0	1	0	1	0	GTATGT	0	1	1	0	1	0	AACTAAT	2	142344
chrI	151022	-	chrI:151022:151098:-	1	1	1	1	0	GTATGT	1	0	0	0	0	0	TACTAAC	0	151022
chrI	152002	-	chrI:152002:152055:-	1	0	0	0	2	GTATAC	0	0	0	0	0	0	TACTAAT	1	152004
chrI	152004	-	chrI:152004:152055:-	0	1	0	0	2	GTATAC	0	1	0	0	0	0	TACTAAT	1	152004
chrI	157810	-	chrI:157810:157862:-	0	1	0	0	2	GTATAC	0	1	0	0	0	0	TACTAAT	1	157810
chrII	13950	-	chrII:13950:14027:-	1	1	0	0	0	GTATGT	0	1	1	0	1	0	TACTAAC	0	13950
chrII	45936	+	chrII:45875:45936:+	0	1	0	0	2	GCATGC	0	1	0	0	0	0	TACTAAC	0	45936
chrII	47071	-	chrII:47071:47143:-	1	1	1	1	0	GTATGT	1	0	0	0	0	0	TACTAAT	1	47071
chrII	49796	+	chrII:49765:49796:+	0	1	0	0	3	GAACGC	0	1	0	0	0	0	AACTAAT	2	49796
chrII	76232	+	chrII:76189:76232:+	0	1	0	0	1	GTCTGT	0	1	1	0	1	0	TACTAAC	0	76232
chrII	89158	-	chrII:89158:89219:-	0	1	0	0	4	CAAAGC	0	1	0	0	0	0	TACTAAC	0	89158
chrII	110451	-	chrII:110451:110507:-	1	1	1	1	1	GTAAGT	1	0	0	0	0	0	TACTAAC	0	110451
chrII	110932	+	chrII:110882:110932:+	1	1	1	1	1	GTATGC	1	0	0	0	0	0	TACTAAC	0	110932
chrII	115534	+	chrII:115478:115534:+	1	0	0	0	0	GTATGT	0	1	1	0	1	1	TACTTAC	1	115536
chrII	125234	+	chrII:125158:125234:+	1	1	1	1	0	GTATGT	1	0	0	0	0	0	TACTAAC	0	125234
chrII	142787	-	chrII:142787:142849:-	1	1	1	1	0	GTATGT	1	0	0	0	0	0	TACTAAC	0	142787
chrII	142813	-	chrII:142813:142850:-	1	0	0	0	3	CTAAGA	0	1	0	0	0	0	ATCGAAC	3	142801
chrII	167928	+	chrII:167855:167928:+	0	1	0	0	1	GTAAGT	0	1	1	0	1	0	TACTAAT	1	167928
chrII	168770	+	chrII:168696:168770:+	0	1	1	0	2	GTAATT	1	0	0	0	0	0	TACTAAC	0	168770
chrII	170731	+	chrII:170680:170731:+	1	0	0	1	0	GTATGT	0	1	1	0	1	1	AACTAAC	1	170730
chrII	170771	+	chrII:170680:170771:+	1	1	1	1	0	GTATGT	1	0	0	0	0	0	TACTAAC	0	170771
chrII	186375	-	chrII:186375:186430:-	1	1	1	1	0	GTATGT	1	0	0	0	0	0	TACTAAC	0	186375
chrII	206285	+	chrII:206192:206285:+	0	1	0	0	0	GTATGT	0	1	1	0	1	0	TACTAAC	0	206285
chrII	221024	+	chrII:220982:221024:+	1	0	0	0	1	GTATGA	0	1	1	1	0	0	CTCTAAC	2	221027
chrII	290471	-	chrII:290471:290528:-	0	1	0	0	0	GTATGT	0	1	1	0	1	0	AACTGAC	2	290471
chrII	291715	-	chrII:291715:291771:-	1	0	0	0	1	GTAAGT	0	1	1	0	1	0	AACTATC	2	291713
chrII	306856	-	chrII:306856:306902:-	1	0	0	0	2	GTATCA	0	0	0	0	0	0	TACTGAC	1	306858
chrII	306858	-	chrII:306858:306902:-	0	1	0	0	2	GTATCA	0	1	0	0	0	0	TACTGAC	1	306858
chrII	331390	-	chrII:331390:331438:-	1	0	0	0	1	GTATGA	0	0	0	0	0	0	TACTAAT	1	331392
chrII	331392	-	chrII:331392:331438:-	0	1	0	0	1	GTATGA	0	1	1	0	1	0	TACTAAT	1	331392
chrII	333365	+	chrII:333319:333365:+	1	1	1	0	2	GTAGGA	1	0	0	0	0	0	TACTAAC	0	333365
chrII	341037	-	chrII:341037:341094:-	1	0	0	0	0	GTATGT	0	0	0	0	0	0	GACTAAC	1	341039
chrII	341039	-	chrII:341039:341094:-	0	1	0	0	0	GTATGT	0	1	1	0	1	0	GACTAAC	1	341039
chrII	342755	+	chrII:342697:342755:+	1	0	0	0	1	GTGTGT	0	0	0	0	0	0	TATTAAC	1	342757
chrII	342757	+	chrII:342697:342757:+	0	1	0	0	1	GTGTGT	0	1	1	0	1	0	TATTAAC	1	342757
chrII	366534	-	chrII:366534:366582:-	1	1	1	1	0	GTATGT	1	0	0	0	0	0	AACTAAC	1	366534
chrII	372031	+	chrII:371971:372031:+	0	1	0	0	2	GAACGT	0	1	0	0	0	0	AACTAAC	1	372031
chrII	407047	-	chrII:407047:407116:-	1	1	1	1	0	GTATGT	1	0	0	0	0	0	TACTAAC	0	407047
chrII	419960	+	chrII:419915:419960:+	0	1	0	0	2	TTATGG	0	1	0	0	0	0	GACTAAC	1	419960
chrII	425496	-	chrII:425496:425538:-	0	1	0	0	2	CTAAGT	0	1	0	0	0	0	CATTAAC	2	425496
chrII	426524	-	chrII:426524:426624:-	0	1	1	0	1	GTAAGT	1	0	0	0	0	0	TACTAAC	0	426524
chrII	431595	-	chrII:431595:431650:-	0	1	0	0	1	GTAGGT	0	1	1	0	1	0	TACTGAC	1	431595
chrII	443735	-	chrII:443735:443827:-	1	1	0	0	0	GTATGT	0	1	1	0	1	0	TATTAAC	1	443735
chrII	462255	+	chrII:462204:462255:+	1	1	1	1	1	GTATGA	1	0	0	0	0	0	TACTGAC	1	462255
chrII	462472	+	chrII:462424:462472:+	1	1	1	1	0	GTATGT	1	0	0	0	0	0	TACTAAC	0	462472
chrII	479389	+	chrII:479340:479389:+	1	1	1	1	0	GTATGT	1	0	0	0	0	0	TACTAAC	0	479389
chrII	519068	-	chrII:519068:519131:-	0	1	0	0	1	GTAAGT	0	1	1	0	1	0	TACTAAC	0	519068
chrII	592709	-	chrII:592709:592763:-	1	0	0	1	0	GTATGT	0	1	1	1	0	0	CGCTAAC	2	592712
chrII	602175	+	chrII:602099:602175:+	1	1	1	1	0	GTATGT	1	0	0	0	0	0	CACTAAC	1	602175
chrII	606346	+	chrII:606276:606346:+	1	0	0	1	0	GTATGT	0	1	1	0	1	0	TCGTCAC	3	606344
chrII	606615	+	chrII:606567:606615:+	1	1	1	0	1	TTATGT	1	0	0	0	0	0	TACTAAC	0	606615
chrII	643000	-	chrII:643000:643073:-	1	0	0	0	3	GCTCGT	0	1	0	0	0	0	TGCGAGC	3	643004
chrII	653429	+	chrII:653364:653429:+	1	1	1	1	0	GTATGT	1	0	0	0	0	0	GATTAAC	2	653429
chrII	679973	-	chrII:679973:680034:-	1	1	1	1	0	GTATGT	1	0	0	0	0	0	GACTAAC	1	679973
chrII	726947	-	chrII:726947:727006:-	1	1	1	1	0	GTATGT	1	0	0	0	0	0	CGCTAAC	2	726947
chrII	756983	-	chrII:756983:757037:-	0	1	0	0	1	GTAGGT	0	1	1	0	1	0	AACTAAC	1	756983
chrII	792452	-	chrII:792452:792495:-	0	1	0	0	2	GTACTT	0	1	0	0	0	0	TATTAAC	1	792452
chrIII	17807	+	chrIII:17761:17807:+	0	1	0	0	2	GTAGGC	0	1	0	0	0	0	AACTAAC	1	17807
chrIII	27690	-	chrIII:27690:27745:-	0	1	0	0	3	GTAATG	0	1	0	0	0	0	TACTAAC	0	27690
chrIII	42034	+	chrIII:41999:42034:+	1	0	0	0	3	CTAATT	0	1	0	0	0	0	TATAAAA	3	42034
chrIII	84710	+	chrIII:84665:84710:+	0	1	0	0	1	GTCTGT	0	1	1	0	1	0	TTCTAAC	1	84710
chrIII	101646	-	chrIII:101646:101700:-	1	1	1	1	0	GTATGT	1	0	0	0	0	0	TACTAAC	0	101646
chrIII	107089	+	chrIII:107034:107089:+	1	1	1	1	0	GTATGT	1	0	0	0	0	0	TACTAAC	0	107089
chrIII	107255	+	chrIII:107192:107255:+	1	1	1	1	0	GTATGT	1	0	0	0	0	0	TACTAAC	0	107255
chrIII	111588	-	chrIII:111588:111632:-	1	1	1	1	1	GTATGC	1	0	0	0	0	0	GACTAAC	1	111588
chrIII	119535	-	chrIII:119535:119586:-	0	1	0	0	3	GTACTG	0	1	0	0	0	0	TACTAAC	0	119535
chrIII	120380	+	chrIII:120290:120380:+	0	1	0	0	1	GTAAGT	0	1	1	0	1	0	TACTAAC	0	120380
chrIII	123571	-	chrIII:123571:123637:-	1	0	0	0	3	GTCTAG	0	1	0	0	0	0	TTTTTAC	3	123563
chrIII	169190	-	chrIII:169190:169268:-	0	1	0	0	1	GTATAT	0	1	1	0	1	0	TTCTAAC	1	169190
chrIII	173137	-	chrIII:173137:173194:-	1	1	1	1	0	GTATGT	1	0	0	0	0	0	TACTAAC	0	173137
chrIII	177952	-	chrIII:177952:178031:-	1	1	1	0	1	GTATAT	1	0	0	0	0	0	TACTAAC	0	177952
chrIII	221010	+	chrIII:220979:221010:+	0	1	0	0	4	TATTCT	0	1	0	0	0	0	TACTAAT	1	221010
chrIII	228654	+	chrIII:228610:228654:+	1	0	0	0	1	GTATGA	0	0	0	0	0	0	AACTAAC	1	228657
chrIII	228657	+	chrIII:228610:228657:+	0	1	0	0	1	GTATGA	0	1	1	0	1	0	AACTAAC	1	228657
chrIII	290581	+	chrIII:290522:290581:+	0	1	0	0	1	GTATTT	0	1	1	0	1	0	AACTAAC	1	290581
chrIV	22303	-	chrIV:22303:22355:-	1	0	0	0	1	GTAAGT	0	1	1	0	1	0	AGCTAAC	2	22305
chrIV	65358	+	chrIV:65308:65358:+	1	1	1	1	0	GTATGT	1	0	0	0	0	0	TACTAAC	0	65358
chrIV	104616	+	chrIV:104542:104616:+	0	1	0	0	1	GTATGA	0	1	1	0	1	0	TATTAAC	1	104616
chrIV	107156	+	chrIV:107107:107156:+	1	0	0	0	1	GTAGGT	0	1	1	1	0	0	TACTCAC	1	107159
chrIV	122157	+	chrIV:122079:122157:+	1	0	0	1	0	GTATGT	0	0	0	0	0	0	TACTAAC	0	122160
chrIV	122160	+	chrIV:122079:122160:+	0	1	0	1	0	GTATGT	0	1	1	0	1	0	TACTAAC	0	122160
chrIV	130286	-	chrIV:130286:130359:-	0	1	0	0	2	GTATCG	0	1	0	0	0	0	TACTAAT	1	130286
chrIV	130329	+	chrIV:130289:130329:+	0	1	0	0	1	GTATGC	0	1	1	0	1	0	AACTAAC	1	130329
chrIV	188134	-	chrIV:188134:188194:-	0	1	0	0	1	GTATGA	0	1	1	0	1	0	TATTAAC	1	188134
chrIV	217970	+	chrIV:217907:217970:+	0	1	1	0	2	GTATTA	1	0	0	0	0	0	TACTAAC	0	217970
chrIV	230262	+	chrIV:230202:230262:+	0	1	1	0	1	GTATTT	1	0	0	0	0	0	TACTAAC	0	230262
chrIV	232835	+	chrIV:232747:232835:+	1	0	0	0	1	GTATAT	0	0	0	0	0	0	CACTGAC	2	232838
chrIV	232838	+	chrIV:232747:232838:+	0	1	0	0	1	GTATAT	0	1	1	0	1	0	CACTGAC	2	232838
chrIV	235105	+	chrIV:235039:235105:+	1	0	0	0	1	GTATGA	0	0	0	0	0	0	TTCTAAC	1	235108
chrIV	235108	+	chrIV:235039:235108:+	0	1	0	0	1	GTATGA	0	1	1	0	1	1	TTCTAAC	1	235108
chrIV	239421	-	chrIV:239421:239509:-	1	1	1	1	0	GTATGT	1	0	0	0	0	0	TACTAAC	0	239421
chrIV	247246	-	chrIV:247246:247300:-	0	1	0	0	1	GTATAT	0	1	1	0	1	0	TACTAAC	0	247246
chrIV	248591	+	chrIV:248513:248591:+	0	1	0	0	2	GTCAGT	0	1	0	0	0	0	CACTAAC	1	248591
chrIV	254999	-	chrIV:254999:255044:-	1	1	1	1	0	GTATGT	1	0	0	0	0	0	GACTAAC	1	254999
chrIV	267780	+	chrIV:267726:267780:+	1	1	1	1	0	GTATGT	1	0	0	0	0	0	TACTAAC	0	267780
chrIV	268934	-	chrIV:268934:269000:-	1	1	0	0	1	GTACGT	0	1	1	0	1	1	TACTGAC	1	268934
chrIV	273738	+	chrIV:273662:273738:+	0	1	0	0	2	GTCCGT	0	1	0	0	0	0	CACTAAC	1	273738
chrIV	299960	-	chrIV:299960:300001:-	0	1	0	0	2	GTTTGG	0	1	0	0	0	0	TACTAAC	0	299960
chrIV	307375	-	chrIV:307375:307457:-	0	1	1	0	2	GGAAGT	1	0	0	0	0	0	TACTAAC	0	307375
chrIV	331276	+	chrIV:331190:331276:+	1	0	0	0	1	GTAAGT	0	0	0	0	0	0	CACTAAC	1	331278
chrIV	331278	+	chrIV:331190:331278:+	0	1	0	0	1	GTAAGT	0	1	1	0	1	0	CACTAAC	1	331278
chrIV	333710	+	chrIV:333639:333710:+	0	1	0	0	1	GTATGC	0	1	1	0	1	0	TACTAAT	1	333710
chrIV	337596	+	chrIV:337525:337596:+	1	1	1	1	1	GTAAGT	1	0	0	0	0	0	TACTAAC	0	337596
chrIV	381065	-	chrIV:381065:381143:-	0	1	0	0	1	GTATCT	0	1	1	0	1	0	CACTAAC	1	381065
chrIV	392638	+	chrIV:392591:392638:+	1	0	0	0	0	GTATGT	0	1	1	1	0	0	TACTAAA	1	392642
chrIV	392679	+	chrIV:392591:392679:+	1	0	0	0	0	GTATGT	0	0	0	0	0	0	TATTAAC	1	392682
chrIV	392682	+	chrIV:392591:392682:+	0	1	0	0	0	GTATGT	0	1	1	0	1	0	TATTAAC	1	392682
chrIV	399468	+	chrIV:399360:399468:+	1	1	1	1	0	GTATGT	1	0	0	0	0	0	TACTAAC	0	399468
chrIV	431423	-	chrIV:431423:431470:-	1	1	1	1	1	GTACGT	1	0	0	0	0	0	TACTAAC	0	431423
chrIV	437849	+	chrIV:437796:437849:+	1	0	0	0	4	AAAGAT	0	1	0	0	0	0	TCGTCAT	4	437854
chrIV	438275	+	chrIV:438208:438275:+	1	0	0	0	1	GTAAGT	0	1	1	0	1	0	CTCTAAC	2	438277
chrIV	451430	-	chrIV:451430:451488:-	1	0	0	0	1	GTATGG	0	1	1	0	1	0	TGCTAAC	1	451431
chrIV	451996	-	chrIV:451996:452077:-	0	1	0	0	2	GTCGGT	0	1	0	0	0	0	AACTAAC	1	451996
chrIV	456687	-	chrIV:456687:456757:-	1	0	0	0	1	GTAAGT	0	0	0	0	0	0	TACTAAT	1	456689
chrIV	456689	-	chrIV:456689:456757:-	0	1	0	0	1	GTAAGT	0	1	1	0	1	0	TACTAAT	1	456689
chrIV	458048	-	chrIV:458048:458095:-	1	1	1	1	0	GTATGT	1	0	0	0	0	0	TACTAAC	0	458048
chrIV	491873	+	chrIV:491792:491873:+	0	1	1	0	3	ATTTTT	1	0	0	0	0	0	TACTAAC	0	491873
chrIV	540580	+	chrIV:540538:540580:+	1	0	0	0	1	GTAAGT	0	0	0	0	0	0	TACTAAT	1	540586
chrIV	540586	+	chrIV:540538:540586:+	0	1	0	0	1	GTAAGT	0	1	1	0	1	0	TACTAAT	1	540586
chrIV	569665	-	chrIV:569665:569722:-	1	1	1	1	0	GTATGT	1	0	0	0	0	0	TACTAAC	0	569665
chrIV	579963	+	chrIV:579894:579963:+	1	1	1	0	1	GTATGG	1	0	0	0	0	0	TACTAAC	0	579963
chrIV	630016	+	chrIV:629904:630016:+	0	1	1	1	0	GTATGT	1	0	0	0	0	0	TACTAAC	0	630016
chrIV	653424	+	chrIV:653365:653424:+	0	1	0	0	3	TTACGA	0	1	0	0	0	0	TACTAAC	0	653424
chrIV	655244	+	chrIV:655202:655244:+	1	0	0	0	1	GTATGC	0	1	1	1	0	0	TACTAAG	1	655257
chrIV	657891	+	chrIV:657846:657891:+	0	1	0	0	2	GTATCA	0	1	0	0	0	0	AACTGAC	2	657891
chrIV	676355	+	chrIV:676270:676355:+	1	0	0	0	1	GTACGT	0	0	0	0	0	0	AACTAAC	1	676358
chrIV	676358	+	chrIV:676270:676358:+	0	1	0	0	1	GTACGT	0	1	1	0	1	0	AACTAAC	1	676358
chrIV	698042	-	chrIV:698042:698092:-	0	1	0	0	1	GTACGT	0	1	1	0	1	0	TATTAAC	1	698042
chrIV	715265	-	chrIV:715265:715356:-	1	1	1	1	0	GTATGT	1	0	0	0	0	0	TACTAAC	0	715265
chrIV	715306	-	chrIV:715264:715306:-	1	0	0	0	2	GTTAGT	0	1	0	0	0	0	TTCTACC	2	715298
chrIV	721692	-	chrIV:721692:721739:-	0	1	0	0	1	GTTTGT	0	1	1	0	1	0	TTCTAAC	1	721692
chrIV	733713	-	chrIV:733713:733773:-	1	1	1	1	0	GTATGT	1	0	0	0	0	0	TACTAAC	0	733713
chrIV	768399	-	chrIV:768399:768453:-	1	0	0	0	1	ATATGT	0	0	0	0	0	0	AACTAAC	1	768401
chrIV	768401	-	chrIV:768401:768453:-	0	1	0	0	1	ATATGT	0	1	1	0	1	0	AACTAAC	1	768401
chrIV	885149	+	chrIV:885101:885149:+	0	1	0	0	2	GTATCA	0	1	0	0	0	0	GACTAAC	1	885149
chrIV	929251	+	chrIV:929206:929251:+	1	0	0	0	1	GTATGA	0	0	0	0	0	0	AACTAAC	1	929254
chrIV	929254	+	chrIV:929206:929254:+	0	1	0	0	1	GTATGA	0	1	1	0	1	0	AACTAAC	1	929254
chrIV	992896	+	chrIV:992862:992896:+	1	0	0	0	4	CCATCG	0	1	0	0	0	0	TGCGCAC	3	992899
chrIV	1021387	+	chrIV:1021323:1021387:+	0	1	0	0	1	ATATGT	0	1	1	0	1	0	GACTAAC	1	1021387
chrIV	1073346	-	chrIV:1073346:1073398:-	1	1	1	1	1	GTATGC	1	0	0	0	0	0	TACTAAC	0	1073346
chrIV	1080239	-	chrIV:1080239:1080322:-	0	1	0	0	1	GTATAT	0	1	1	0	1	0	CACTAAC	1	1080239
chrIV	1081205	+	chrIV:1081142:1081205:+	0	1	0	0	1	GTATGA	0	1	1	0	1	0	AATTAAC	2	1081205
chrIV	1103871	+	chrIV:1103808:1103871:+	1	1	1	1	0	GTATGT	1	0	0	0	0	0	CACTAAC	1	1103871
chrIV	1111888	+	chrIV:1111836:1111888:+	0	1	0	0	0	GTATGT	0	1	1	0	1	0	CACTAAC	1	1111888
chrIV	1114332	+	chrIV:1114289:1114332:+	1	0	0	0	0	GTATGT	0	0	0	0	0	0	TACTAAC	0	1114335
chrIV	1114335	+	chrIV:1114289:1114335:+	0	1	0	0	0	GTATGT	0	1	1	0	1	1	TACTAAC	0	1114335
chrIV	1145148	+	chrIV:1145107:1145148:+	1	0	0	0	1	GTACGT	0	1	1	1	0	0	TGCTAAC	1	1145151
chrIV	1181081	+	chrIV:1181036:1181081:+	0	1	0	0	3	AGATCT	0	1	0	0	0	0	CACTAAC	1	1181081
chrIV	1212941	+	chrIV:1212871:1212941:+	1	1	1	1	0	GTATGT	1	0	0	0	0	0	TACTAAC	0	1212941
chrIV	1237581	+	chrIV:1237527:1237581:+	1	1	1	0	1	GTTTGT	1	0	0	0	0	0	GACTAAC	1	1237581
chrIV	1238769	-	chrIV:1238769:1238817:-	1	1	1	1	0	GTATGT	1	0	0	0	0	0	AACTAAC	1	1238769
chrIV	1256999	-	chrIV:1256999:1257056:-	1	0	0	0	4	GGTTAG	0	1	0	0	0	0	TCCGCAT	4	1257001
chrIV	1266790	-	chrIV:1266790:1266854:-	1	1	1	1	0	GTATGT	1	0	0	0	0	0	TACTAAC	0	1266790
chrIV	1266846	+	chrIV:1266789:1266846:+	1	0	0	0	2	GTTAGT	0	0	0	0	0	0	AACTAAC	1	1266849
chrIV	1266849	+	chrIV:1266789:1266849:+	0	1	0	0	2	GTTAGT	0	1	0	0	0	0	AACTAAC	1	1266849
chrIV	1319627	-	chrIV:1319627:1319690:-	1	1	1	1	0	GTATGT	1	0	0	0	0	0	TACTAAC	0	1319627
chrIV	1319751	-	chrIV:1319751:1319809:-	1	1	1	1	0	GTATGT	1	0	0	0	0	0	TACTAAC	0	1319751
chrIV	1333317	-	chrIV:1333317:1333401:-	0	1	0	0	1	GTATGC	0	1	1	0	1	0	TACTAAT	1	1333317
chrIV	1355141	-	chrIV:1355141:1355228:-	0	1	0	0	3	GTAGAG	0	1	0	0	0	0	AACTAAC	1	1355141
chrIV	1407178	+	chrIV:1407133:1407178:+	0	1	0	0	2	GTATAC	0	1	0	0	0	0	TACTAAC	0	1407178
chrIV	1411915	-	chrIV:1411915:1411963:-	1	1	0	0	2	ACATGT	0	1	0	0	0	0	GACTAAC	1	1411915
chrIV	1450485	-	chrIV:1450485:1450533:-	1	1	1	0	3	GTTGTT	1	0	0	0	0	0	TACTAAC	0	1450485
chrIV	1453413	+	chrIV:1453370:1453413:+	0	1	0	0	2	GTTGGT	0	1	0	0	0	0	TACTAAC	0	1453413
chrIV	1490516	-	chrIV:1490516:1490571:-	1	0	0	0	0	GTATGT	0	0	0	0	0	0	GACTAAC	1	1490518
chrIV	1490518	-	chrIV:1490518:1490571:-	0	1	0	0	0	GTATGT	0	1	1	0	1	1	GACTAAC	1	1490518
chrIV	1519506	-	chrIV:1519506:1519576:-	0	1	0	0	1	GTATGC	0	1	1	0	1	1	GACTAAC	1	1519506
chrV	7558	-	chrV:7558:7625:-	0	1	0	0	2	GTATAA	0	1	0	0	0	0	TACTAAC	0	7558
chrV	61195	+	chrV:61112:61195:+	0	1	0	0	1	GTACGT	0	1	1	0	1	0	TACTAAT	1	61195
chrV	124639	-	chrV:124639:124687:-	0	1	0	0	0	GTATGT	0	1	1	0	1	0	AACTAAC	1	124639
chrV	131853	+	chrV:131777:131853:+	1	1	1	1	0	GTATGT	1	0	0	0	0	0	CACTAAC	1	131853
chrV	148254	+	chrV:148194:148254:+	1	1	1	1	1	GTATGC	1	0	0	0	0	0	TACTAAC	0	148254
chrV	151105	+	chrV:151038:151105:+	1	0	0	0	0	GTATGT	0	1	1	1	0	0	TACTTAC	1	151108
chrV	159013	-	chrV:159013:159086:-	1	1	1	1	0	GTATGT	1	0	0	0	0	0	AACTAAC	1	159013
chrV	160515	+	chrV:160465:160515:+	0	1	0	0	1	GTATAT	0	1	1	0	1	0	ATCTAAC	2	160515
chrV	166786	-	chrV:166786:166873:-	1	1	1	1	0	GTATGT	1	0	0	0	0	0	TACTAAC	0	166786
chrV	166806	-	chrV:166806:166873:-	1	0	0	1	0	GTATGT	0	1	1	0	1	0	TTTTGAC	3	166805
chrV	201996	+	chrV:201953:201996:+	1	0	0	0	0	GTATGT	0	0	0	0	0	0	TACTGAC	1	201998
chrV	201998	+	chrV:201953:201998:+	0	1	0	0	0	GTATGT	0	1	1	0	1	1	TACTGAC	1	201998
chrV	203929	+	chrV:203855:203929:+	0	1	0	0	1	GTATGG	0	1	1	0	1	0	TATTAAC	1	203929
chrV	239667	-	chrV:239667:239710:-	0	1	1	1	1	GTACGT	1	0	0	0	0	0	TACTAAC	0	239667
chrV	258656	+	chrV:258593:258656:+	1	0	0	0	2	GTAGGA	0	0	0	0	0	0	TACTAAC	0	258658
chrV	258658	+	chrV:258593:258658:+	0	1	0	0	2	GTAGGA	0	1	0	0	0	0	TACTAAC	0	258658
chrV	269803	-	chrV:269803:269865:-	0	1	1	0	3	GTGTTA	1	0	0	0	0	0	TACTAAC	0	269803
chrV	292572	-	chrV:292572:292618:-	1	1	0	0	2	GTACAT	0	1	0	0	0	0	TACTAAC	0	292572
chrV	305682	+	chrV:305624:305682:+	1	0	0	0	0	GTATGT	0	0	0	0	0	0	ATCTAAC	2	305685
chrV	305685	+	chrV:305624:305685:+	0	1	0	0	0	GTATGT	0	1	1	0	1	0	ATCTAAC	2	305685
chrV	307801	+	chrV:307743:307801:+	1	1	1	1	0	GTATGT	1	0	0	0	0	0	TACTAAC	0	307801
chrV	308040	+	chrV:307953:308040:+	1	1	1	1	0	GTATGT	1	0	0	0	0	0	TACTAAC	0	308040
chrV	336934	+	chrV:336866:336934:+	1	0	0	0	1	GTATGA	0	0	0	0	0	0	TACTAAC	0	336937
chrV	336937	+	chrV:336866:336937:+	0	1	0	0	1	GTATGA	0	1	1	0	1	0	TACTAAC	0	336937
chrV	348217	-	chrV:348217:348272:-	1	1	1	1	0	GTATGT	1	0	0	0	0	0	TACTAAC	0	348217
chrV	362828	+	chrV:362729:362828:+	1	0	0	1	0	GTATGT	0	0	0	0	0	0	TTCTAAC	1	362831
chrV	362831	+	chrV:362729:362831:+	0	1	0	1	0	GTATGT	0	1	1	0	1	0	TTCTAAC	1	362831
chrV	374670	-	chrV:374670:374721:-	1	0	0	0	1	GTTTGT	0	0	0	0	0	0	GACTGAC	2	374672
chrV	374672	-	chrV:374672:374721:-	0	1	0	0	1	GTTTGT	0	1	1	0	1	1	GACTGAC	2	374672
chrV	397225	+	chrV:397147:397225:+	0	1	1	0	3	TGTTGT	1	0	0	0	0	0	TACTAAC	0	397225
chrV	423912	+	chrV:423821:423912:+	1	0	0	0	3	GTAGAG	0	0	0	0	0	0	TACTAAC	0	423914
chrV	423914	+	chrV:423821:423914:+	0	1	0	0	3	GTAGAG	0	1	0	0	0	0	TACTAAC	0	423914
chrV	433162	+	chrV:433110:433162:+	0	1	1	0	3	TTCTCT	1	0	0	0	0	0	TACTAAC	0	433162
chrV	435438	-	chrV:435438:435498:-	0	1	0	0	2	GTAAAT	0	1	0	0	0	0	AACTAAC	1	435438
chrV	487860	+	chrV:487816:487860:+	0	1	0	0	1	GTATGA	0	1	1	0	1	0	TACTAAC	0	487860
chrV	517899	+	chrV:517847:517899:+	1	0	0	0	0	GTATGT	0	0	0	0	0	0	TACTAAC	0	517902
chrV	517902	+	chrV:517847:517902:+	0	1	0	0	0	GTATGT	0	1	1	0	1	0	TACTAAC	0	517902
chrV	540383	-	chrV:540383:540436:-	1	0	0	0	0	GTATGT	0	1	1	0	1	0	TCCTAAC	1	540384
chrV	548611	+	chrV:548548:548611:+	1	1	1	1	0	GTATGT	1	0	0	0	0	0	TACTAAC	0	548611
chrV	561246	+	chrV:561200:561246:+	0	1	0	0	0	GTATGT	0	1	1	0	1	0	CACTAAC	1	561246
chrVI	32029	-	chrVI:32029:32077:-	0	1	0	0	1	GTAAGT	0	1	1	0	1	0	AACTAAC	1	32029
chrVI	63915	-	chrVI:63915:63972:-	1	1	1	1	0	GTATGT	1	0	0	0	0	0	TACTAAC	0	63915
chrVI	64615	-	chrVI:64615:64682:-	0	1	1	0	4	GCAGTA	1	0	0	0	0	0	TACTAAC	0	64615
chrVI	96257	+	chrVI:96184:96257:+	1	0	0	0	1	GTATTT	0	0	0	0	0	0	TTCTAAC	1	96259
chrVI	96259	+	chrVI:96184:96259:+	0	1	0	0	1	GTATTT	0	1	1	0	1	0	TTCTAAC	1	96259
chrVI	103131	-	chrVI:103131:103173:-	0	1	0	0	2	TTTTGT	0	1	0	0	0	0	TACTAAC	0	103131
chrVI	109970	-	chrVI:109970:110026:-	0	1	0	0	1	GTAAGT	0	1	1	0	1	0	GATTAAC	2	109970
chrVI	131143	-	chrVI:131143:131201:-	0	1	0	0	2	GTTAGT	0	1	0	0	0	0	GACTAAT	2	131143
chrVI	137939	+	chrVI:137848:137939:+	0	1	0	0	4	ATGGAT	0	1	0	0	0	0	TACTAAC	0	137939
chrVI	176326	-	chrVI:176326:176385:-	1	0	0	0	1	GTATGG	0	0	0	0	0	0	AACTAAC	1	176328
chrVI	176328	-	chrVI:176328:176385:-	0	1	0	0	1	GTATGG	0	1	1	0	1	1	AACTAAC	1	176328
chrVI	203304	-	chrVI:203304:203374:-	1	1	1	1	0	GTATGT	1	0	0	0	0	0	TACTAAC	0	203304
chrVI	221291	-	chrVI:221291:221402:-	1	1	1	1	0	GTATGT	1	0	0	0	0	0	TACTAAC	0	221291
chrVI	242044	+	chrVI:241997:242044:+	1	1	1	1	1	GTAAGT	1	0	0	0	0	0	TATTAAC	1	242044
chrVI	268723	+	chrVI:268674:268723:+	0	1	0	0	1	GTATGC	0	1	1	0	1	0	CACTAAC	1	268723
chrVII	16567	+	chrVII:16513:16567:+	0	1	0	0	4	ATTAAT	0	1	0	0	0	0	TACTGAC	1	16567
chrVII	34394	-	chrVII:34394:34444:-	0	1	0	0	4	ACCGGT	0	1	0	0	0	0	GACTAAC	1	34394
chrVII	35284	-	chrVII:35284:35351:-	1	0	0	0	2	GTAAGG	0	0	0	0	0	0	TACTAAC	0	35288
chrVII	35288	-	chrVII:35288:35351:-	0	1	0	0	2	GTAAGG	0	1	0	0	0	0	TACTAAC	0	35288
chrVII	51959	+	chrVII:51882:51959:+	0	1	0	0	0	GTATGT	0	1	1	0	1	0	TATTGAC	2	51959
chrVII	59557	+	chrVII:59483:59557:+	0	1	0	0	1	GTATGG	0	1	1	0	1	0	AACTAAT	2	59557
chrVII	62173	+	chrVII:62132:62173:+	1	1	1	1	0	GTATGT	1	0	0	0	0	0	TACTAAC	0	62173
chrVII	73034	-	chrVII:73034:73136:-	1	1	1	1	1	GTACGT	1	0	0	0	0	0	TACTAAC	0	73034
chrVII	77521	+	chrVII:77467:77521:+	0	1	0	0	2	GTATCA	0	1	0	0	0	0	AACTAAC	1	77521
chrVII	140634	+	chrVII:140554:140634:+	0	1	0	0	1	GTATCT	0	1	1	0	1	0	ATCTAAC	2	140634
chrVII	143935	-	chrVII:143935:143984:-	1	0	0	0	0	GTATGT	0	1	1	0	1	0	TACTTAC	1	143937
chrVII	148658	-	chrVII:148658:148721:-	1	0	0	0	2	TTACGT	0	0	0	0	0	0	TACTAAC	0	148660
chrVII	148660	-	chrVII:148660:148721:-	0	1	0	0	2	TTACGT	0	1	0	0	0	0	TACTAAC	0	148660
chrVII	157245	-	chrVII:157245:157288:-	1	1	1	1	0	GTATGT	1	0	0	0	0	0	CACTAAC	1	157245
chrVII	166587	+	chrVII:166543:166587:+	0	1	0	0	3	ATACGC	0	1	0	0	0	0	TACTGAC	1	166587
chrVII	167428	+	chrVII:167361:167428:+	1	0	0	1	0	GTATGT	0	0	0	0	0	0	TTCTAAC	1	167431
chrVII	167431	+	chrVII:167361:167431:+	0	1	0	1	0	GTATGT	0	1	1	0	1	0	TTCTAAC	1	167431
chrVII	188026	-	chrVII:188026:188070:-	0	1	0	0	3	GTACCG	0	1	0	0	0	0	TACTAAC	0	188026
chrVII	253204	-	chrVII:253204:253253:-	1	0	0	0	1	GTATGA	0	0	0	0	0	0	TACTAAT	1	253206
chrVII	253206	-	chrVII:253206:253253:-	0	1	0	0	1	GTATGA	0	1	1	0	1	1	TACTAAT	1	253206
chrVII	262617	-	chrVII:262617:262696:-	0	1	0	0	0	GTATGT	0	1	1	0	1	0	CACTAAC	1	262617
chrVII	293423	+	chrVII:293335:293423:+	0	1	0	0	1	GTATTT	0	1	1	0	1	0	GACTAAC	1	293423
chrVII	293818	+	chrVII:293737:293818:+	0	1	0	0	1	GTATGG	0	1	1	0	1	0	TACTAAC	0	293818
chrVII	311486	+	chrVII:311402:311486:+	0	1	1	0	2	GGTTGT	1	0	0	0	0	0	TACTAAC	0	311486
chrVII	314263	-	chrVII:314263:314298:-	0	1	0	0	2	ATATAT	0	1	0	0	0	0	TACTGAC	1	314263
chrVII	345544	-	chrVII:345544:345614:-	0	1	0	0	0	GTATGT	0	1	1	0	1	0	TACTAAT	1	345544
chrVII	346854	-	chrVII:346854:346896:-	1	1	1	1	0	GTATGT	1	0	0	0	0	0	TACTAAC	0	346854
chrVII	380661	-	chrVII:380661:380732:-	0	1	0	0	1	GTATTT	0	1	1	0	1	0	TATTGAC	2	380661
chrVII	383552	+	chrVII:383489:383552:+	1	0	0	0	0	GTATGT	0	0	0	0	0	0	TATTAAC	1	383555
chrVII	383555	+	chrVII:383489:383555:+	0	1	0	0	0	GTATGT	0	1	1	0	1	0	TATTAAC	1	383555
chrVII	414314	+	chrVII:414250:414314:+	0	1	0	0	1	GTATGG	0	1	1	0	1	0	AACTAAC	1	414314
chrVII	423868	-	chrVII:423868:423911:-	0	1	0	0	1	GTATGA	0	1	1	0	1	0	AACTAAC	1	423868
chrVII	427173	-	chrVII:427173:427221:-	0	1	0	0	0	GTATGT	0	1	1	0	1	0	TATTAAC	1	427173
chrVII	435728	+	chrVII:435686:435728:+	0	1	1	0	2	TTAAGT	1	0	0	0	0	0	TACTAAC	0	435728
chrVII	436362	+	chrVII:436318:436362:+	1	0	0	0	0	GTATGT	0	0	0	0	0	0	TACTAAC	0	436365
chrVII	436365	+	chrVII:436318:436365:+	0	1	0	0	0	GTATGT	0	1	1	0	1	0	TACTAAC	0	436365
chrVII	439462	+	chrVII:439387:439462:+	1	0	0	0	1	GTAAGT	0	1	1	1	0	0	CGCTAAC	2	439465
chrVII	443013	-	chrVII:443013:443066:-	1	1	0	0	2	GTCAGT	0	1	0	0	0	0	TACTGAC	1	443013
chrVII	472352	-	chrVII:472352:472397:-	1	0	0	0	2	GTGAGT	0	1	0	0	0	0	TGCTAAC	1	472354
chrVII	497394	-	chrVII:497394:497462:-	1	1	1	1	0	GTATGT	1	0	0	0	0	0	TACTAAC	0	497394
chrVII	497408	-	chrVII:497408:497462:-	1	0	0	1	0	GTATGT	0	1	1	1	0	0	TACTAAC	0	497394
chrVII	497961	-	chrVII:497961:498003:-	1	0	1	1	1	GTAAGT	1	0	0	0	0	0	TACTAAC	0	497961
chrVII	504218	-	chrVII:504218:504268:-	0	1	0	0	1	GTATGA	0	1	1	0	1	0	TTCTAAC	1	504218
chrVII	543691	+	chrVII:543643:543691:+	1	0	0	1	0	GTATGT	0	1	1	1	0	0	TCCAATC	3	543686
chrVII	543708	+	chrVII:543643:543708:+	1	1	1	1	0	GTATGT	1	0	0	0	0	0	TATTAAC	1	543708
chrVII	555885	+	chrVII:555835:555885:+	1	0	0	1	0	GTATGT	0	1	1	1	0	0	CACGAAA	3	555891
chrVII	556282	+	chrVII:556232:556282:+	1	1	1	0	3	GTGGAT	1	0	0	0	0	0	TACTAAC	0	556282
chrVII	561204	-	chrVII:561204:561267:-	1	0	0	0	2	GGTTGT	0	0	0	0	0	0	TACTAAC	0	561206
chrVII	561206	-	chrVII:561206:561267:-	0	1	0	0	2	GGTTGT	0	1	0	0	0	0	TACTAAC	0	561206
chrVII	574775	+	chrVII:574705:574775:+	1	0	0	0	1	GTATTT	0	0	0	0	0	0	TACTAAC	0	574778
chrVII	574778	+	chrVII:574705:574778:+	0	1	0	0	1	GTATTT	0	1	1	0	1	0	TACTAAC	0	574778
chrVII	593473	+	chrVII:593395:593473:+	0	1	0	0	1	GTAAGT	0	1	1	0	1	0	TACTGAC	1	593473
chrVII	594137	-	chrVII:594137:594202:-	1	0	0	0	0	GTATGT	0	0	0	0	0	0	TACTAAC	0	594141
chrVII	594141	-	chrVII:594141:594202:-	0	1	0	0	0	GTATGT	0	1	1	0	1	0	TACTAAC	0	594141
chrVII	607019	-	chrVII:607019:607091:-	0	1	0	0	1	GTATGG	0	1	1	0	1	0	AACTAAC	1	607019
chrVII	627186	-	chrVII:627186:627225:-	1	0	0	0	4	AACTGA	0	1	0	0	0	0	AAGAAAT	4	627187
chrVII	658297	+	chrVII:658204:658297:+	0	1	0	0	1	GTTTGT	0	1	1	0	1	0	TACTAAC	0	658297
chrVII	682970	-	chrVII:682970:683069:-	0	1	0	0	0	GTATGT	0	1	1	0	1	0	TTCTAAC	1	682970
chrVII	700757	+	chrVII:700717:700757:+	1	0	0	0	4	TCCTGA	0	1	0	0	0	0	TATCAAT	3	700761
chrVII	730064	+	chrVII:730017:730064:+	0	1	0	0	1	GTATGG	0	1	1	0	1	0	GACTAAT	2	730064
chrVII	772105	+	chrVII:772019:772105:+	0	1	0	0	0	GTATGT	0	1	1	0	1	1	TACTGAC	1	772105
chrVII	792328	-	chrVII:792328:792385:-	0	1	0	0	1	GTATCT	0	1	1	0	1	0	TACTAAC	0	792328
chrVII	859434	-	chrVII:859434:859478:-	1	0	0	1	0	GTATGT	0	1	1	0	1	0	TAAAAAT	3	859434
chrVII	875661	+	chrVII:875581:875661:+	0	1	0	0	1	GCATGT	0	1	1	0	1	0	ATCTAAC	2	875661
chrVII	878176	-	chrVII:878176:878242:-	0	1	0	0	3	TTAAGA	0	1	0	0	0	0	TACTAAC	0	878176
chrVII	914791	-	chrVII:914791:914879:-	0	1	0	0	1	GTAAGT	0	1	1	0	1	0	AACTAAC	1	914791
chrVII	937275	+	chrVII:937216:937275:+	0	1	0	0	2	GTAAGA	0	1	0	0	0	0	CACTAAC	1	937275
chrVII	946407	+	chrVII:946331:946407:+	1	1	1	1	1	GTACGT	1	0	0	0	0	0	TACTAAC	0	946407
chrVII	951679	-	chrVII:951679:951729:-	0	1	0	0	2	GTATAC	0	1	0	0	0	0	TACTAAT	1	951679
chrVII	962304	+	chrVII:962229:962304:+	0	1	0	0	0	GTATGT	0	1	1	0	1	0	TACTAAC	0	962304
chrVII	1002937	+	chrVII:1002886:1002937:+	0	1	0	0	1	GCATGT	0	1	1	0	1	0	TACTAAC	0	1002937
chrVII	1017561	-	chrVII:1017561:1017603:-	0	1	0	0	5	CCACCA	0	1	0	0	0	0	CACTAAC	1	1017561
chrVII	1052639	-	chrVII:1052639:1052724:-	0	1	0	0	1	GTATGG	0	1	1	0	1	0	TACTAAC	0	1052639
chrVII	1083748	-	chrVII:1083748:1083798:-	0	1	0	0	2	GTATAA	0	1	0	0	0	0	TACTAAC	0	1083748
chrVIII	97942	-	chrVIII:97942:98036:-	0	1	0	0	1	GTACGT	0	1	1	0	1	0	GACTAAT	2	97942
chrVIII	104751	+	chrVIII:104684:104751:+	0	1	1	0	2	ACATGT	1	0	0	0	0	0	TACTAAC	0	104751
chrVIII	107815	+	chrVIII:107766:107815:+	0	1	0	0	2	GCAAGT	0	1	0	0	0	0	AACTAAC	1	107815
chrVIII	107875	+	chrVIII:107827:107875:+	1	1	1	1	1	GTAAGT	1	0	0	0	0	0	TACTAAC	0	107875
chrVIII	115533	+	chrVIII:115489:115533:+	0	1	0	0	2	GTATAA	0	1	0	0	0	0	TACTAAT	1	115533
chrVIII	129590	+	chrVIII:129523:129590:+	1	0	0	1	0	GTATGT	0	1	1	1	0	0	AACTTCC	3	129593
chrVIII	129611	+	chrVIII:129523:129611:+	1	1	1	1	0	GTATGT	1	0	0	0	0	0	TACTAAC	0	129611
chrVIII	138274	-	chrVIII:138274:138323:-	0	1	1	0	1	GTCTGT	1	0	0	0	0	0	TACTAAC	0	138274
chrVIII	148770	-	chrVIII:148770:148814:-	1	1	0	0	1	GTATGC	0	1	1	0	1	0	CATTAAC	2	148770
chrVIII	187613	-	chrVIII:187613:187669:-	1	1	1	1	0	GTATGT	1	0	0	0	0	0	TACTAAC	0	187613
chrVIII	189778	-	chrVIII:189778:189843:-	1	1	1	1	0	GTATGT	1	0	0	0	0	0	TGCTAAC	1	189778
chrVIII	189806	-	chrVIII:189806:189844:-	1	0	0	0	4	GCTGAT	0	1	0	0	0	0	TCGGAAT	4	189806
chrVIII	236985	+	chrVIII:236958:236985:+	1	0	0	0	4	TTAAAA	0	1	0	0	0	0	AAATAAA	3	236997
chrVIII	251233	+	chrVIII:251158:251233:+	1	1	1	1	0	GTATGT	1	0	0	0	0	0	GACTAAC	1	251233
chrVIII	255689	-	chrVIII:255689:255752:-	1	1	1	1	0	GTATGT	1	0	0	0	0	0	TACTAAC	0	255689
chrVIII	255706	-	chrVIII:255706:255753:-	1	0	0	0	3	GTCCAT	0	1	0	0	0	0	TTCTAAG	2	255702
chrVIII	262372	-	chrVIII:262372:262442:-	0	1	1	1	0	GTATGT	1	0	0	0	0	0	TATTAAC	1	262372
chrVIII	298418	-	chrVIII:298418:298487:-	1	1	1	1	0	GTATGT	1	0	0	0	0	0	TACTAAC	0	298418
chrVIII	315810	-	chrVIII:315810:315861:-	1	1	1	1	0	GTATGT	1	0	0	0	0	0	TACTAAC	0	315810
chrVIII	335608	-	chrVIII:335608:335675:-	0	1	0	0	1	GTACGT	0	1	1	0	1	1	TACTGAC	1	335608
chrVIII	354926	+	chrVIII:354868:354926:+	1	1	1	1	0	GTATGT	1	0	0	0	0	0	TACTAAC	0	354926
chrVIII	372284	+	chrVIII:372191:372284:+	0	1	0	0	1	GTTTGT	0	1	1	0	1	0	TACTAAC	0	372284
chrVIII	382356	-	chrVIII:382356:382410:-	0	1	1	0	4	ATACAA	1	0	0	0	0	0	TACTAAC	0	382356
chrVIII	400569	-	chrVIII:400569:400651:-	0	1	0	0	0	GTATGT	0	1	1	0	1	0	TACTGAC	1	400569
chrVIII	406673	-	chrVIII:406673:406756:-	1	0	0	0	1	GCATGT	0	1	1	0	1	0	TACTAAC	0	406675
chrVIII	442923	+	chrVIII:442871:442923:+	0	1	0	0	1	GTATAT	0	1	1	0	1	0	TATTAAC	1	442923
chrVIII	491867	-	chrVIII:491867:491919:-	0	1	0	0	0	GTATGT	0	1	1	0	1	0	TACTAAT	1	491867
chrVIII	498731	-	chrVIII:498731:498786:-	1	1	1	1	0	GTATGT	1	0	0	0	0	0	TACTAAC	0	498731
chrVIII	508825	+	chrVIII:508795:508825:+	1	0	0	0	6	CCGGCC	0	1	0	0	0	0	TTCTCAA	3	508835
chrIX	40246	+	chrIX:40178:40246:+	0	1	0	0	3	TCAAGT	0	1	0	0	0	0	TACTAAC	0	40246
chrIX	47743	+	chrIX:47699:47743:+	1	1	1	1	1	GTAAGT	1	0	0	0	0	0	TACTAAC	0	47743
chrIX	54025	+	chrIX:53941:54025:+	1	0	0	0	0	GTATGT	0	0	0	0	0	0	TTCTAAC	1	54027
chrIX	54027	+	chrIX:53941:54027:+	0	1	0	0	0	GTATGT	0	1	1	0	1	0	TTCTAAC	1	54027
chrIX	127052	-	chrIX:127052:127135:-	1	0	0	0	1	GTATAT	0	0	0	0	0	0	TATTAAC	1	127054
chrIX	127054	-	chrIX:127054:127135:-	0	1	0	0	1	GTATAT	0	1	1	0	1	0	TATTAAC	1	127054
chrIX	128117	+	chrIX:128061:128117:+	1	0	0	0	2	TTTTGT	0	0	0	0	0	0	TACTAAC	0	128119
chrIX	128119	+	chrIX:128061:128119:+	0	1	0	0	2	TTTTGT	0	1	0	0	0	0	TACTAAC	0	128119
chrIX	134038	+	chrIX:133971:134038:+	1	0	0	0	1	GTAAGT	0	0	0	0	0	0	CACTAAC	1	134041
chrIX	134041	+	chrIX:133971:134041:+	0	1	0	0	1	GTAAGT	0	1	1	0	1	0	CACTAAC	1	134041
chrIX	155276	+	chrIX:155220:155276:+	1	1	1	1	1	GCATGT	1	0	0	0	0	0	TACTAAC	0	155276
chrIX	155301	+	chrIX:155220:155301:+	1	0	0	1	1	GCATGT	0	1	1	1	0	0	TACAAGC	2	155293
chrIX	166484	+	chrIX:166432:166484:+	1	1	1	1	0	GTATGT	1	0	0	0	0	0	TATTAAC	1	166484
chrIX	166501	+	chrIX:166432:166501:+	1	0	0	1	0	GTATGT	0	1	1	0	1	0	GAGTTAC	3	166502
chrIX	183435	-	chrIX:183435:183500:-	1	0	0	0	4	CCCAGT	0	1	0	0	0	0	CACTTAT	3	183433
chrIX	225117	+	chrIX:225035:225117:+	0	1	0	0	1	GTATGA	0	1	1	0	1	0	TACTAAC	0	225117
chrIX	225834	-	chrIX:225834:225896:-	0	1	1	1	1	GTATAT	1	0	0	0	0	0	AACTAAC	1	225834
chrIX	232012	-	chrIX:232012:232070:-	1	1	1	0	3	GTACTG	1	0	0	0	0	0	TACTAAC	0	232012
chrIX	261764	+	chrIX:261723:261764:+	1	0	0	0	1	GTATGA	0	0	0	0	0	0	TACTAAT	1	261767
chrIX	261767	+	chrIX:261723:261767:+	0	1	0	0	1	GTATGA	0	1	1	0	1	0	TACTAAT	1	261767
chrIX	317136	+	chrIX:317062:317136:+	1	1	1	0	2	TTCTGT	1	0	0	0	0	0	TACTAAC	0	317136
chrIX	317159	+	chrIX:317107:317159:+	1	0	0	0	5	ATGAAA	0	1	0	0	0	0	TCCTCAT	3	317160
chrIX	334601	-	chrIX:334601:334643:-	0	1	0	0	1	GTTTGT	0	1	1	0	1	0	TACTAAT	1	334601
chrIX	348380	-	chrIX:348380:348491:-	0	1	1	1	1	GTATGA	1	0	0	0	0	0	TACTAAC	0	348380
chrIX	360695	-	chrIX:360695:360737:-	0	1	0	0	1	GCATGT	0	1	1	0	1	0	TACTAAC	0	360695
chrIX	363684	+	chrIX:363652:363684:+	0	1	0	0	4	TAACGC	0	1	0	0	0	0	TACTAAC	0	363684
chrIX	387166	+	chrIX:387136:387166:+	1	0	0	0	5	CCAACA	0	1	0	0	0	0	AAAAAAA	4	387166
chrX	31819	+	chrX:31768:31819:+	1	0	0	0	0	GTATGT	0	0	0	0	0	0	TATTAAC	1	31821
chrX	31821	+	chrX:31768:31821:+	0	1	0	0	0	GTATGT	0	1	1	0	1	0	TATTAAC	1	31821
chrX	50351	-	chrX:50351:50411:-	1	1	1	1	0	GTATGT	1	0	0	0	0	0	TACTAAC	0	50351
chrX	71474	+	chrX:71426:71474:+	1	0	0	0	2	GTTGGT	0	0	0	0	0	0	TACTAAC	0	71476
chrX	71476	+	chrX:71426:71476:+	0	1	0	0	2	GTTGGT	0	1	0	0	0	0	TACTAAC	0	71476
chrX	74178	+	chrX:74112:74178:+	1	1	1	0	2	GGTTGT	1	0	0	0	0	0	TACTAAC	0	74178
chrX	76268	+	chrX:76213:76268:+	0	1	1	0	2	GTATTG	1	0	0	0	0	0	TACTAAC	0	76268
chrX	119610	-	chrX:119610:119650:-	0	1	0	0	3	GAGTTT	0	1	0	0	0	0	TACTAAC	0	119610
chrX	165023	+	chrX:164962:165023:+	0	1	0	0	2	GTGGGT	0	1	0	0	0	0	CACTAAC	1	165023
chrX	172451	-	chrX:172451:172499:-	1	1	0	0	4	AGTTCT	0	1	0	0	0	0	TACTAAC	0	172451
chrX	209416	+	chrX:209358:209416:+	0	1	0	0	1	GTATGG	0	1	1	0	1	0	TACTAAC	0	209416
chrX	234005	+	chrX:233962:234005:+	1	0	0	0	4	CTGGCT	0	1	0	0	0	0	TCCTGGC	3	233999
chrX	237006	+	chrX:236962:237006:+	0	1	0	0	1	GTATGC	0	1	1	0	1	1	CACTGAC	2	237006
chrX	264006	-	chrX:264006:264058:-	1	0	0	0	2	GTGCGT	0	0	0	0	0	0	TACTAAC	0	264008
chrX	264008	-	chrX:264008:264058:-	0	1	0	0	2	GTGCGT	0	1	0	0	0	0	TACTAAC	0	264008
chrX	328113	-	chrX:328113:328177:-	0	1	0	0	2	GTAAGC	0	1	0	0	0	0	TACTAAC	0	328113
chrX	345274	+	chrX:345230:345274:+	0	1	0	0	3	GTAGAG	0	1	0	0	0	0	TACTAAC	0	345274
chrX	349226	+	chrX:349181:349226:+	0	1	0	0	0	GTATGT	0	1	1	0	1	0	CATTAAC	2	349226
chrX	365853	+	chrX:365780:365853:+	1	1	1	1	0	GTATGT	1	0	0	0	0	0	TACTAAC	0	365854
chrX	387380	-	chrX:387380:387430:-	1	1	1	1	0	GTATGT	1	0	0	0	0	0	TACTGAC	1	387381
chrX	396512	-	chrX:396512:396565:-	1	1	1	1	0	GTATGT	1	0	0	0	0	0	TACTAAC	0	396513
chrX	422629	+	chrX:422549:422629:+	1	0	0	0	1	GTATGA	0	0	0	0	0	0	TACTAAT	1	422632
chrX	422632	+	chrX:422549:422632:+	0	1	0	0	1	GTATGA	0	1	1	0	1	1	TACTAAT	1	422632
chrX	432390	-	chrX:432390:432464:-	1	0	0	0	2	GTATAC	0	0	0	0	0	0	TACTAAC	0	432392
chrX	432392	-	chrX:432392:432464:-	0	1	0	0	2	GTATAC	0	1	0	0	0	0	TACTAAC	0	432392
chrX	435281	+	chrX:435222:435281:+	1	0	0	1	0	GTATGT	0	1	1	0	1	0	AAGTAAA	3	435279
chrX	435302	+	chrX:435222:435302:+	1	1	1	1	0	GTATGT	1	0	0	0	0	0	TACTAAC	0	435303
chrX	455749	+	chrX:455690:455749:+	0	1	0	0	1	GTACGT	0	1	1	0	1	0	TACTAAC	0	455749
chrX	469190	-	chrX:469190:469256:-	1	1	1	1	2	GTTCGT	1	0	0	0	0	0	TACTAAC	0	469191
chrX	506240	+	chrX:506193:506240:+	0	1	0	0	1	GTATGA	0	1	1	0	1	0	TTCTAAC	1	506240
chrX	517546	-	chrX:517546:517607:-	1	1	0	0	2	GTACGC	0	1	0	0	0	0	AACTAAC	1	517546
chrX	526804	-	chrX:526804:526879:-	0	1	0	0	2	TAATGT	0	1	0	0	0	0	TACTAAC	0	526804
chrX	535287	-	chrX:535287:535343:-	0	1	0	0	1	GTAAGT	0	1	1	0	1	0	CACTAAC	1	535287
chrX	538617	+	chrX:538579:538617:+	1	0	0	0	5	TCCTAA	0	1	0	0	0	0	TACGGAA	3	538616
chrX	570579	-	chrX:570579:570633:-	1	0	0	0	3	GTAGTC	0	0	0	0	0	0	TACTAAC	0	570581
chrX	570581	-	chrX:570581:570633:-	0	1	0	0	3	GTAGTC	0	1	0	0	0	0	TACTAAC	0	570581
chrX	608540	+	chrX:608476:608540:+	0	1	1	0	1	GTAGGT	1	0	0	0	0	0	TACTAAC	0	608541
chrX	632997	-	chrX:632997:633051:-	1	1	0	0	1	GTATGC	0	1	1	0	1	1	AACTAAC	1	632997
chrX	633065	-	chrX:633065:633144:-	0	1	0	0	2	GTAAGC	0	1	0	0	0	0	TACTAAT	1	633065
chrX	649522	-	chrX:649522:649569:-	0	1	0	0	1	GCATGT	0	1	1	0	1	0	TACTAAC	0	649522
chrX	702871	-	chrX:702871:702937:-	0	1	1	0	1	TTATGT	1	0	0	0	0	0	TACTAAC	0	702872
chrX	712054	-	chrX:712054:712106:-	0	1	0	0	1	GTTTGT	0	1	1	0	1	0	TATTAAC	1	712054
chrXI	38910	+	chrXI:38829:38910:+	0	1	0	0	4	AGATAG	0	1	0	0	0	0	TACTGAC	1	38910
chrXI	67767	-	chrXI:67767:67805:-	1	0	0	0	4	GACTAA	0	1	0	0	0	0	AAAAAAG	4	67768
chrXI	74700	+	chrXI:74657:74700:+	1	0	0	0	4	GCGACT	0	1	0	0	0	0	TTTTAAC	2	74713
chrXI	83061	+	chrXI:83004:83061:+	1	1	1	1	0	GTATGT	1	0	0	0	0	0	TACTAAC	0	83061
chrXI	93382	-	chrXI:93382:93470:-	1	0	0	1	1	GTACGT	0	0	0	0	0	0	AACTAAC	1	93385
chrXI	93385	-	chrXI:93385:93470:-	0	1	0	1	1	GTACGT	0	1	1	0	1	0	AACTAAC	1	93385
chrXI	94082	-	chrXI:94082:94154:-	1	1	0	0	0	GTATGT	0	1	1	0	1	0	TACTAAC	0	94082
chrXI	96757	+	chrXI:96692:96757:+	1	0	0	0	1	GTAGGT	0	1	1	0	1	0	AACTTAC	2	96759
chrXI	158627	-	chrXI:158627:158679:-	0	1	0	0	1	ATATGT	0	1	1	0	1	0	TACTAAC	0	158627
chrXI	166477	+	chrXI:166405:166477:+	1	0	0	1	1	GTACGT	0	0	0	0	0	0	TACTAAC	0	166479
chrXI	166479	+	chrXI:166405:166479:+	0	1	0	1	1	GTACGT	0	1	1	0	1	0	TACTAAC	0	166479
chrXI	166501	+	chrXI:166452:166501:+	0	1	0	0	3	GTACTC	0	1	0	0	0	0	AACTAAC	1	166501
chrXI	191090	-	chrXI:191090:191173:-	0	1	0	0	1	GTAAGT	0	1	1	0	1	0	AATTAAC	2	191090
chrXI	193009	-	chrXI:193009:193071:-	1	0	0	0	0	GTATGT	0	0	0	0	0	0	CACTAAC	1	193011
chrXI	193011	-	chrXI:193011:193071:-	0	1	0	0	0	GTATGT	0	1	1	0	1	1	CACTAAC	1	193011
chrXI	225773	-	chrXI:225773:225852:-	1	0	0	0	1	GTAAGT	0	0	0	0	0	0	TATTAAC	1	225775
chrXI	225775	-	chrXI:225775:225852:-	0	1	0	0	1	GTAAGT	0	1	1	0	1	0	TATTAAC	1	225775
chrXI	231493	+	chrXI:231447:231493:+	1	1	0	0	1	GTATGA	0	1	1	0	1	0	TATTAAC	1	231493
chrXI	262173	+	chrXI:262138:262173:+	0	1	0	0	3	AGAAGT	0	1	0	0	0	0	GACTAAC	1	262173
chrXI	272946	-	chrXI:272946:272992:-	1	0	0	0	0	GTATGT	0	0	0	0	0	0	TTCTAAC	1	272948
chrXI	272948	-	chrXI:272948:272992:-	0	1	0	0	0	GTATGT	0	1	1	0	1	0	TTCTAAC	1	272948
chrXI	283016	+	chrXI:282962:283016:+	0	1	1	0	2	GGAAGT	1	0	0	0	0	0	TACTAAC	0	283016
chrXI	285869	+	chrXI:285816:285869:+	0	1	0	0	1	GTATGA	0	1	1	0	1	0	TACTAAC	0	285869
chrXI	290611	-	chrXI:290611:290705:-	1	1	0	0	1	GTAGGT	0	1	1	0	1	0	TACTAAC	0	290611
chrXI	302664	+	chrXI:302572:302664:+	1	0	0	0	4	CTCAAT	0	1	0	0	0	0	TCCTGTC	3	302659
chrXI	313868	+	chrXI:313796:313868:+	0	1	0	0	2	GTAGAT	0	1	0	0	0	0	TACTAAC	0	313868
chrXI	408145	+	chrXI:408101:408145:+	1	0	0	0	1	GTAAGT	0	0	0	0	0	0	AACTAAC	1	408147
chrXI	408147	+	chrXI:408101:408147:+	0	1	0	0	1	GTAAGT	0	1	1	0	1	0	AACTAAC	1	408147
chrXI	430163	-	chrXI:430163:430239:-	1	1	1	1	0	GTATGT	1	0	0	0	0	0	TACTAAC	0	430163
chrXI	437526	+	chrXI:437481:437526:+	1	1	1	1	0	GTATGT	1	0	0	0	0	0	TACTAAC	0	437526
chrXI	446831	-	chrXI:446831:446885:-	0	1	0	0	1	GTATGC	0	1	1	0	1	0	GACTAAC	1	446831
chrXI	447376	-	chrXI:447376:447453:-	1	1	1	1	0	GTATGT	1	0	0	0	0	0	TACTAAC	0	447376
chrXI	449611	-	chrXI:449611:449663:-	1	1	1	1	0	GTATGT	1	0	0	0	0	0	TACTGAC	1	449611
chrXI	465718	-	chrXI:465718:465764:-	0	1	0	0	2	GTAGGA	0	1	0	0	0	0	TATTAAC	1	465718
chrXI	468921	-	chrXI:468921:468975:-	1	0	0	0	1	GTATGC	0	1	1	0	1	0	TGCTAAC	1	468923
chrXI	490069	+	chrXI:489994:490069:+	1	0	0	0	0	GTATGT	0	0	0	0	0	0	TACTTAT	2	490067
chrXI	490072	+	chrXI:489994:490072:+	0	1	0	0	0	GTATGT	0	1	1	0	1	0	ATCTAAC	2	490072
chrXI	552232	+	chrXI:552176:552232:+	0	1	0	0	2	GTAAAT	0	1	0	0	0	0	TACTAAC	0	552232
chrXI	618096	-	chrXI:618096:618168:-	1	1	1	0	1	GTTTGT	1	0	0	0	0	0	TACTAAC	0	618096
chrXI	625594	+	chrXI:625544:625594:+	1	1	1	1	1	GTAAGT	1	0	0	0	0	0	TACTAAC	0	625594
chrXI	633805	-	chrXI:633805:633874:-	0	1	0	0	1	GTCTGT	0	1	1	0	1	0	TACTAAC	0	633805
chrXI	649450	+	chrXI:649382:649450:+	0	1	0	0	1	GTATGA	0	1	1	0	1	0	TACTAAC	0	649450
chrXII	40353	-	chrXII:40353:40399:-	1	1	1	1	1	GTATGC	1	0	0	0	0	0	TACTAAC	0	40353
chrXII	50295	+	chrXII:50224:50295:+	1	0	0	0	0	GTATGT	0	0	0	0	0	0	CATTAAC	2	50298
chrXII	50298	+	chrXII:50224:50298:+	0	1	0	0	0	GTATGT	0	1	1	0	1	0	CATTAAC	2	50298
chrXII	75836	-	chrXII:75836:75882:-	0	1	0	0	3	GTAAAC	0	1	0	0	0	0	TACTAAC	0	75836
chrXII	83743	-	chrXII:83743:83803:-	1	1	0	0	3	GTTGTT	0	1	0	0	0	0	TACTAAC	0	83743
chrXII	90639	+	chrXII:90568:90639:+	0	1	0	0	1	GTATGC	0	1	1	0	1	0	AACTAAC	1	90639
chrXII	155740	-	chrXII:155740:155813:-	1	0	0	0	1	GTAAGT	0	0	0	0	0	0	CACTAAC	1	155742
chrXII	155742	-	chrXII:155742:155813:-	0	1	0	0	1	GTAAGT	0	1	1	0	1	0	CACTAAC	1	155742
chrXII	232371	+	chrXII:232297:232371:+	0	1	0	0	1	GTAAGT	0	1	1	0	1	0	AACTAAT	2	232371
chrXII	242652	+	chrXII:242595:242652:+	0	1	1	0	2	GTACTT	1	0	0	0	0	0	TACTAAC	0	242652
chrXII	250899	-	chrXII:250899:250948:-	1	1	1	1	1	GTATGG	1	0	0	0	0	0	TACTAAC	0	250899
chrXII	263540	+	chrXII:263478:263540:+	0	1	1	0	4	GCAGTA	1	0	0	0	0	0	TACTAAC	0	263540
chrXII	286498	-	chrXII:286498:286557:-	1	1	1	1	0	GTATGT	1	0	0	0	0	0	TACTAAC	0	286498
chrXII	286519	-	chrXII:286519:286557:-	1	0	0	1	0	GTATGT	0	1	1	1	0	0	TGCTAAA	2	286516
chrXII	316898	+	chrXII:316853:316898:+	0	1	0	0	1	GTATGA	0	1	1	0	1	0	AACTAAT	2	316898
chrXII	327295	-	chrXII:327295:327400:-	1	1	1	1	0	GTATGT	1	0	0	0	0	0	GACTAAC	1	327295
chrXII	327338	-	chrXII:327338:327400:-	1	0	0	0	4	CCATTA	0	1	0	0	0	0	TGCTCAT	3	327339
chrXII	331860	-	chrXII:331860:331922:-	0	1	0	0	0	GTATGT	0	1	1	0	1	0	TACTGAC	1	331860
chrXII	333653	+	chrXII:333603:333653:+	0	1	0	0	3	GTAAAG	0	1	0	0	0	0	TATTAAC	1	333653
chrXII	366444	+	chrXII:366367:366444:+	0	1	0	0	2	GTATCG	0	1	0	0	0	0	AACTAAC	1	366444
chrXII	380685	+	chrXII:380627:380685:+	0	1	0	0	0	GTATGT	0	1	1	0	1	0	TTCTAAC	1	380685
chrXII	382367	+	chrXII:382302:382367:+	0	1	0	0	0	GTATGT	0	1	1	0	1	1	TATTAAC	1	382367
chrXII	382387	+	chrXII:382302:382387:+	1	0	0	0	0	GTATGT	0	1	1	0	1	1	TACTTAC	1	382389
chrXII	398583	+	chrXII:398534:398583:+	1	1	1	1	0	GTATGT	1	0	0	0	0	0	TACTAAC	0	398583
chrXII	491543	+	chrXII:491497:491543:+	1	0	0	0	1	GTATAT	0	0	0	0	0	0	TATTAAC	1	491546
chrXII	491546	+	chrXII:491497:491546:+	0	1	0	0	1	GTATAT	0	1	1	0	1	0	TATTAAC	1	491546
chrXII	522714	+	chrXII:522672:522714:+	1	0	0	1	0	GTATGT	0	0	0	0	0	0	TATTGAC	2	522716
chrXII	522716	+	chrXII:522672:522716:+	0	1	0	1	0	GTATGT	0	1	1	0	1	0	TATTGAC	2	522716
chrXII	522984	+	chrXII:522893:522984:+	0	1	1	0	1	GTATGC	1	0	0	0	0	0	TACTAAC	0	522984
chrXII	548706	-	chrXII:548706:548765:-	1	1	1	1	0	GTATGT	1	0	0	0	0	0	GACTAAC	1	548706
chrXII	564467	-	chrXII:564467:564515:-	1	1	1	1	1	GTAAGT	1	0	0	0	0	0	GACTAAC	1	564467
chrXII	605300	-	chrXII:605300:605434:-	1	0	0	0	3	GCTCGT	0	1	0	0	0	0	CACTTTC	3	605298
chrXII	609448	-	chrXII:609448:609498:-	1	1	0	0	1	GTATGA	0	1	1	0	1	0	ATCTAAC	2	609448
chrXII	694444	+	chrXII:694385:694444:+	1	1	1	1	0	GTATGT	1	0	0	0	0	0	TACTAAC	0	694444
chrXII	744185	+	chrXII:744185:744221:+	1	0	0	0	4	ATAATC	0	1	0	0	0	0	TTCTCAT	3	744189
chrXII	744219	+	chrXII:744156:744219:+	1	1	1	1	1	GTACGT	1	0	0	0	0	0	TACTAAC	0	744219
chrXII	766086	-	chrXII:766086:766129:-	1	1	1	1	0	GTATGT	1	0	0	0	0	0	AACTAAC	1	766086
chrXII	766205	-	chrXII:766205:766249:-	1	1	1	1	0	GTATGT	1	0	0	0	0	0	AACTAAC	1	766205
chrXII	783406	-	chrXII:783406:783492:-	0	1	0	0	2	TAATGT	0	1	0	0	0	0	TTCTAAC	1	783406
chrXII	786667	+	chrXII:786616:786667:+	1	1	1	1	0	GTATGT	1	0	0	0	0	0	TACTAAC	0	786667
chrXII	791912	-	chrXII:791912:791964:-	0	1	0	0	0	GTATGT	0	1	1	0	1	0	TACTAAT	1	791912
chrXII	818678	+	chrXII:818645:818678:+	1	0	0	0	3	GTGGCT	0	1	0	0	0	0	TTTTAAT	3	818685
chrXII	823171	+	chrXII:823108:823171:+	0	1	0	0	1	GTAAGT	0	1	1	0	1	0	TATTAAC	1	823171
chrXII	827562	-	chrXII:827562:827606:-	0	1	0	0	4	CGACTT	0	1	0	0	0	0	GACTAAC	1	827562
chrXII	857038	+	chrXII:856988:857038:+	1	1	1	0	2	GTAAGC	1	0	0	0	0	0	TACTAAC	0	857038
chrXII	898621	+	chrXII:898549:898621:+	1	0	0	0	2	GTATAA	0	0	0	0	0	0	TACTAAC	0	898624
chrXII	898624	+	chrXII:898549:898624:+	0	1	0	0	2	GTATAA	0	1	0	0	0	0	TACTAAC	0	898624
chrXII	907076	+	chrXII:907032:907076:+	0	1	0	0	3	GTCAGG	0	1	0	0	0	0	AACTAAC	1	907076
chrXII	918955	-	chrXII:918955:919021:-	0	1	0	0	1	ATATGT	0	1	1	0	1	0	CACTAAC	1	918955
chrXII	928302	-	chrXII:928302:928370:-	0	1	0	0	1	GTATAT	0	1	1	0	1	0	TACTAAC	0	928302
chrXII	965103	+	chrXII:965038:965103:+	0	1	0	0	1	GTATAT	0	1	1	0	1	0	TACTAAC	0	965103
chrXII	982467	-	chrXII:982467:982535:-	1	0	0	0	0	GTATGT	0	0	0	0	0	0	GACTAAC	1	982470
chrXII	982470	-	chrXII:982470:982535:-	0	1	0	0	0	GTATGT	0	1	1	0	1	1	GACTAAC	1	982470
chrXII	987191	+	chrXII:987139:987191:+	1	1	1	1	0	GTATGT	1	0	0	0	0	0	TACTAAC	0	987191
chrXII	987202	+	chrXII:987139:987202:+	1	0	0	1	0	GTATGT	0	0	0	0	0	0	AACTAAC	1	987204
chrXII	987204	+	chrXII:987139:987204:+	0	1	0	1	0	GTATGT	0	1	1	0	1	0	AACTAAC	1	987204
chrXII	987241	+	chrXII:987139:987241:+	0	1	0	1	0	GTATGT	0	1	1	0	1	0	GTCTAAC	2	987241
chrXII	988410	+	chrXII:988329:988410:+	0	1	0	0	2	GTAAGC	0	1	0	0	0	0	TACTAAT	1	988410
chrXII	1024631	+	chrXII:1024570:1024631:+	1	1	1	1	1	GTAAGT	1	0	0	0	0	0	TACTAAT	1	1024631
chrXIII	38610	-	chrXIII:38610:38680:-	0	1	0	0	2	GTATCG	0	1	0	0	0	0	TACTAAC	0	38610
chrXIII	56619	+	chrXIII:56557:56619:+	0	1	0	0	1	GTATTT	0	1	1	0	1	0	TATTAAC	1	56619
chrXIII	82343	+	chrXIII:82291:82343:+	1	1	1	1	0	GTATGT	1	0	0	0	0	0	TACTAAC	0	82343
chrXIII	99301	-	chrXIII:99301:99375:-	1	1	1	1	0	GTATGT	1	0	0	0	0	0	TACTAAC	0	99301
chrXIII	112661	-	chrXIII:112661:112715:-	0	1	0	0	1	GTATGA	0	1	1	0	1	0	GACTAAC	1	112661
chrXIII	114129	-	chrXIII:114129:114189:-	0	1	0	0	3	TTAAGA	0	1	0	0	0	0	TACTAAC	0	114129
chrXIII	123777	-	chrXIII:123777:123824:-	1	0	1	0	3	ATCTCT	1	0	0	0	0	0	TACTAAC	0	123777
chrXIII	140113	-	chrXIII:140113:140183:-	1	1	1	1	0	GTATGT	1	0	0	0	0	0	CACTAAC	1	140113
chrXIII	182669	+	chrXIII:182594:182669:+	1	0	0	0	0	GTATGT	0	1	1	1	0	0	TACTAAA	1	182675
chrXIII	204537	-	chrXIII:204537:204588:-	0	1	0	0	1	GTATGA	0	1	1	0	1	0	TACTAAC	0	204537
chrXIII	206162	+	chrXIII:206098:206162:+	1	1	1	1	0	GTATGT	1	0	0	0	0	0	TACTAAC	0	206162
chrXIII	211547	+	chrXIII:211502:211547:+	1	1	1	0	4	TTTTAA	1	0	0	0	0	0	TACTAAC	0	211547
chrXIII	223421	-	chrXIII:223421:223496:-	0	1	1	0	2	GTACGC	1	0	0	0	0	0	TACTAAC	0	223421
chrXIII	225264	-	chrXIII:225264:225338:-	1	1	1	1	1	GTACGT	1	0	0	0	0	0	TACTAAC	0	225264
chrXIII	242969	-	chrXIII:242969:243056:-	0	1	0	0	1	GTAAGT	0	1	1	0	1	0	TACTGAC	1	242969
chrXIII	273521	-	chrXIII:273521:273577:-	0	1	0	0	1	GTGTGT	0	1	1	0	1	0	CACTAAC	1	273521
chrXIII	290869	+	chrXIII:290835:290869:+	1	0	0	0	4	CACCGT	0	1	0	0	0	0	GACTCCC	3	290860
chrXIII	301517	-	chrXIII:301517:301586:-	0	1	0	0	1	GTAAGT	0	1	1	0	1	0	TACTAAC	0	301517
chrXIII	337886	+	chrXIII:337817:337886:+	1	1	1	1	1	GTACGT	1	0	0	0	0	0	TACTAAC	0	337886
chrXIII	425094	+	chrXIII:424997:425094:+	1	0	0	1	0	GTATGT	0	1	1	1	0	0	TATCAAT	3	425101
chrXIII	425113	+	chrXIII:425020:425113:+	0	1	1	0	3	TTTTCT	1	0	0	0	0	0	TACTAAC	0	425113
chrXIII	480618	-	chrXIII:480618:480665:-	1	0	0	0	4	ATGACT	0	1	0	0	0	0	TTCTTTT	4	480615
chrXIII	491154	+	chrXIII:491103:491154:+	0	1	0	0	3	GTACTG	0	1	0	0	0	0	TACTAAC	0	491154
chrXIII	493958	+	chrXIII:493909:493958:+	0	1	0	0	1	GTTTGT	0	1	1	0	1	0	TACTAAT	1	493958
chrXIII	499898	-	chrXIII:499898:499948:-	0	1	1	0	1	TTATGT	1	0	0	0	0	0	TACTAAC	0	499898
chrXIII	517842	+	chrXIII:517791:517842:+	0	1	1	0	3	GTTAGC	1	0	0	0	0	0	TACTAAC	0	517842
chrXIII	537527	+	chrXIII:537448:537527:+	1	1	1	1	0	GTATGT	1	0	0	0	0	0	TACTAAC	0	537527
chrXIII	551141	-	chrXIII:551141:551202:-	1	0	0	1	0	GTATGT	0	0	0	0	0	0	AACTAAT	2	551143
chrXIII	551143	-	chrXIII:551143:551202:-	0	1	0	1	0	GTATGT	0	1	1	0	1	0	AACTAAT	2	551143
chrXIII	552477	+	chrXIII:552425:552477:+	0	1	0	0	3	ATTTTT	0	1	0	0	0	0	AACTAAT	2	552477
chrXIII	559828	+	chrXIII:559782:559828:+	1	0	0	0	0	GTATGT	0	0	0	0	0	0	TACTAAC	0	559831
chrXIII	559831	+	chrXIII:559782:559831:+	0	1	0	0	0	GTATGT	0	1	1	0	1	0	TACTAAC	0	559831
chrXIII	608719	+	chrXIII:608660:608719:+	1	0	0	0	2	GTATTA	0	1	0	0	0	0	TGCTAAC	1	608722
chrXIII	637454	+	chrXIII:637403:637454:+	0	1	0	0	1	GTGTGT	0	1	1	0	1	0	AACTAAC	1	637454
chrXIII	647110	+	chrXIII:647059:647110:+	1	0	0	0	1	GCATGT	0	0	0	0	0	0	CACTAAC	1	647113
chrXIII	647113	+	chrXIII:647059:647113:+	0	1	0	0	1	GCATGT	0	1	1	0	1	0	CACTAAC	1	647113
chrXIII	649542	-	chrXIII:649542:649630:-	0	1	0	0	1	GTATGG	0	1	1	0	1	0	TACTAAC	0	649542
chrXIII	651593	+	chrXIII:651524:651593:+	0	1	1	0	2	GTACAT	1	0	0	0	0	0	TACTAAC	0	651593
chrXIII	652797	-	chrXIII:652797:652846:-	1	1	1	1	1	GTTTGT	1	0	0	0	0	0	CACTAAC	1	652797
chrXIII	652808	-	chrXIII:652808:652846:-	1	0	0	1	1	GTTTGT	0	1	1	1	0	0	CACTAAC	1	652797
chrXIII	653957	-	chrXIII:653957:654018:-	0	1	0	0	0	GTATGT	0	1	1	0	1	0	TATTAAC	1	653957
chrXIII	666961	-	chrXIII:666961:667016:-	1	1	1	1	0	GTATGT	1	0	0	0	0	0	TACTAAC	0	666961
chrXIII	701814	+	chrXIII:701740:701814:+	0	1	0	0	1	GTAGGT	0	1	1	0	1	0	TTCTAAC	1	701814
chrXIII	721231	-	chrXIII:721231:721344:-	1	1	1	1	0	GTATGT	1	0	0	0	0	0	TACTAAC	0	721231
chrXIII	727506	+	chrXIII:727436:727506:+	0	1	0	0	6	TCCCAA	0	1	0	0	0	0	TACTAAC	0	727506
chrXIII	732835	+	chrXIII:732773:732835:+	0	1	1	0	2	GTATTA	1	0	0	0	0	0	TACTAAC	0	732835
chrXIII	753788	-	chrXIII:753788:753832:-	0	1	1	0	4	ATAAAA	1	0	0	0	0	0	TACTAAC	0	753788
chrXIII	810475	-	chrXIII:810475:810549:-	0	1	0	0	1	GTATGA	0	1	1	0	1	0	GACTAAC	1	810475
chrXIII	822588	-	chrXIII:822588:822625:-	1	0	0	0	5	ATCAAA	0	1	0	0	0	0	AAAAAAG	4	822589
chrXIII	832410	+	chrXIII:832362:832410:+	1	0	0	0	2	GTAAAT	0	0	0	0	0	0	TACTGAC	1	832413
chrXIII	832413	+	chrXIII:832362:832413:+	0	1	0	0	2	GTAAAT	0	1	0	0	0	0	TACTGAC	1	832413
chrXIII	845439	-	chrXIII:845439:845541:-	0	1	0	0	1	TTATGT	0	1	1	0	1	0	TACTAAC	0	845439
chrXIII	854879	+	chrXIII:854816:854879:+	1	1	1	1	0	GTATGT	1	0	0	0	0	0	TACTAAC	0	854879
chrXIII	887492	+	chrXIII:887427:887492:+	0	1	0	0	3	CGTTGT	0	1	0	0	0	0	TACTAAC	0	887492
chrXIII	894576	-	chrXIII:894576:894616:-	0	1	0	0	4	CAATCA	0	1	0	0	0	0	TATTAAC	1	894576
chrXIII	910099	-	chrXIII:910099:910130:-	0	1	0	0	2	CGATGT	0	1	0	0	0	0	TAGTAAC	1	910099
chrXIV	17325	-	chrXIV:17325:17361:-	0	1	0	0	3	CCAAGT	0	1	0	0	0	0	CATTAAC	2	17325
chrXIV	48377	+	chrXIV:48293:48377:+	1	1	1	1	0	GTATGT	1	0	0	0	0	0	TACTAAC	0	48377
chrXIV	62407	-	chrXIV:62407:62472:-	0	1	1	0	3	AGTTGT	1	0	0	0	0	0	TACTAAC	0	62407
chrXIV	64389	-	chrXIV:64389:64425:-	0	1	0	0	3	TTTTCT	0	1	0	0	0	0	TATTAAC	1	64389
chrXIV	69245	+	chrXIV:69184:69245:+	0	1	0	0	0	GTATGT	0	1	1	0	1	0	CACTAAC	1	69245
chrXIV	145191	-	chrXIV:145191:145255:-	1	1	1	1	0	GTATGT	1	0	0	0	0	0	TACTAAC	0	145191
chrXIV	174520	-	chrXIV:174520:174572:-	1	0	0	0	2	GTATCG	0	0	0	0	0	0	AACTAAC	1	174522
chrXIV	174522	-	chrXIV:174522:174572:-	0	1	0	0	2	GTATCG	0	1	0	0	0	0	AACTAAC	1	174522
chrXIV	185553	+	chrXIV:185493:185553:+	1	1	1	1	0	GTATGT	1	0	0	0	0	0	TACTAAC	0	185553
chrXIV	217114	-	chrXIV:217114:217193:-	0	1	0	0	0	GTATGT	0	1	1	0	1	0	TTCTAAC	1	217114
chrXIV	224800	+	chrXIV:224764:224800:+	0	1	0	0	3	TTAAGA	0	1	0	0	0	0	TATTAAC	1	224800
chrXIV	227321	-	chrXIV:227321:227353:-	0	1	0	0	4	GTGATA	0	1	0	0	0	0	TACTAAC	0	227321
chrXIV	250195	-	chrXIV:250195:250238:-	0	1	0	0	1	GTATAT	0	1	1	0	1	0	CACTGAC	2	250195
chrXIV	273232	+	chrXIV:273189:273232:+	0	1	0	0	1	GTACGT	0	1	1	0	1	0	AACTAAC	1	273232
chrXIV	273585	-	chrXIV:273585:273650:-	0	1	0	0	2	GTATAA	0	1	0	0	0	0	TATTAAC	1	273585
chrXIV	324786	-	chrXIV:324786:324827:-	0	1	0	0	5	AGGTAG	0	1	0	0	0	0	CACTAAC	1	324786
chrXIV	331803	+	chrXIV:331744:331803:+	0	1	1	0	2	ATATGC	1	0	0	0	0	0	TACTAAC	0	331803
chrXIV	349281	-	chrXIV:349281:349355:-	0	1	0	0	1	GTATGG	0	1	1	0	1	0	GTCTAAC	2	349281
chrXIV	351021	+	chrXIV:350960:351021:+	1	1	1	1	0	GTATGT	1	0	0	0	0	0	TACTAAC	0	351021
chrXIV	359078	-	chrXIV:359078:359147:-	0	1	0	0	1	GTATAT	0	1	1	0	1	0	TACTAAC	0	359078
chrXIV	366096	+	chrXIV:366038:366096:+	1	1	1	1	0	GTATGT	1	0	0	0	0	0	TACTAAC	0	366096
chrXIV	369426	-	chrXIV:369426:369506:-	0	1	0	0	0	GTATGT	0	1	1	0	1	0	TTCTAAC	1	369426
chrXIV	373657	+	chrXIV:373596:373657:+	1	0	0	0	1	GTATGA	0	0	0	0	0	0	TACTAAT	1	373659
chrXIV	373659	+	chrXIV:373596:373659:+	0	1	0	0	1	GTATGA	0	1	1	0	1	0	TACTAAT	1	373659
chrXIV	380699	-	chrXIV:380699:380783:-	1	0	0	1	0	GTATGT	0	0	0	0	0	0	TACTAAT	1	380703
chrXIV	380703	-	chrXIV:380703:380783:-	0	1	0	1	0	GTATGT	0	1	1	0	1	0	TACTAAT	1	380703
chrXIV	380726	-	chrXIV:380726:380783:-	1	1	1	1	0	GTATGT	1	0	0	0	0	0	TACTAAC	0	380726
chrXIV	394038	+	chrXIV:393996:394038:+	0	1	0	0	1	GTATGC	0	1	1	0	1	0	GACTAAC	1	394038
chrXIV	401582	+	chrXIV:401504:401582:+	0	1	0	0	2	GTATCG	0	1	0	0	0	0	TATTAAC	1	401582
chrXIV	413438	-	chrXIV:413438:413482:-	1	0	0	0	4	CGGCGT	0	1	0	0	0	0	TAAAAAA	3	413441
chrXIV	415872	+	chrXIV:415827:415872:+	0	1	1	0	2	GCATGA	1	0	0	0	0	0	TACTAAC	0	415872
chrXIV	427176	+	chrXIV:427106:427176:+	1	0	0	0	1	GTATGA	0	0	0	0	0	0	GACTAAC	1	427178
chrXIV	427178	+	chrXIV:427106:427178:+	0	1	0	0	1	GTATGA	0	1	1	0	1	0	GACTAAC	1	427178
chrXIV	429574	-	chrXIV:429574:429637:-	1	0	0	0	0	GTATGT	0	0	0	0	0	0	TTCTAAC	1	429576
chrXIV	429576	-	chrXIV:429576:429637:-	0	1	0	0	0	GTATGT	0	1	1	0	1	0	TTCTAAC	1	429576
chrXIV	429600	-	chrXIV:429600:429637:-	0	1	0	0	0	GTATGT	0	1	1	0	1	0	TTCGGTC	4	429600
chrXIV	494551	-	chrXIV:494551:494633:-	1	1	1	0	3	GTAATG	1	0	0	0	0	0	TACTAAC	0	494551
chrXIV	534915	-	chrXIV:534915:534966:-	1	1	1	1	1	GTATGC	1	0	0	0	0	0	TACTAAC	0	534915
chrXIV	545341	+	chrXIV:545293:545341:+	1	1	1	1	1	GTAAGT	1	0	0	0	0	0	TACTAAC	0	545341
chrXIV	545603	+	chrXIV:545556:545603:+	0	1	0	0	2	GTAACT	0	1	0	0	0	0	TATTAAC	1	545603
chrXIV	557672	+	chrXIV:557612:557672:+	1	1	1	1	0	GTATGT	1	0	0	0	0	0	TACTAAC	0	557672
chrXIV	561151	-	chrXIV:561151:561218:-	0	1	0	0	3	AAATAT	0	1	0	0	0	0	CACTAAC	1	561151
chrXIV	573918	-	chrXIV:573918:573973:-	0	1	0	0	2	GTTTGA	0	1	0	0	0	0	TACTGAC	1	573918
chrXIV	583911	-	chrXIV:583911:583971:-	1	1	0	0	0	GTATGT	0	1	1	0	1	0	AACTAAC	1	583911
chrXIV	598313	+	chrXIV:598259:598313:+	0	1	0	0	2	GTTTGA	0	1	0	0	0	0	TACTGAC	1	598313
chrXIV	609837	+	chrXIV:609792:609837:+	1	1	1	1	1	GTAAGT	1	0	0	0	0	0	AACTAAC	1	609837
chrXIV	611577	+	chrXIV:611503:611577:+	1	0	0	0	0	GTATGT	0	0	0	0	0	0	TATTAAC	1	611580
chrXIV	611580	+	chrXIV:611503:611580:+	0	1	0	0	0	GTATGT	0	1	1	0	1	0	TATTAAC	1	611580
chrXIV	623270	+	chrXIV:623196:623270:+	0	1	1	0	3	GTACAG	1	0	0	0	0	0	TACTAAT	1	623270
chrXIV	724879	+	chrXIV:724794:724879:+	0	1	0	0	3	GGTAGT	0	1	0	0	0	0	TACTAAC	0	724879
chrXIV	726915	-	chrXIV:726915:726978:-	0	1	0	0	1	GTCTGT	0	1	1	0	1	0	TACTAAC	0	726915
chrXIV	763544	+	chrXIV:763498:763544:+	1	0	0	0	3	GTACAG	0	0	0	0	0	0	TACTAAC	0	763547
chrXIV	763547	+	chrXIV:763498:763547:+	0	1	0	0	3	GTACAG	0	1	0	0	0	0	TACTAAC	0	763547
chrXIV	767745	-	chrXIV:767745:767788:-	0	1	0	0	2	GTACGC	0	1	0	0	0	0	AACTAAC	1	767745
chrXV	87615	+	chrXV:87554:87615:+	0	1	0	0	1	GTATCT	0	1	1	0	1	0	TTCTAAC	1	87615
chrXV	92476	-	chrXV:92476:92521:-	1	1	1	0	3	GTAATG	1	0	0	0	0	0	TACTAAC	0	92476
chrXV	93868	-	chrXV:93868:93914:-	0	1	1	0	2	GTACGG	1	0	0	0	0	0	TACTAAC	0	93868
chrXV	117635	-	chrXV:117635:117684:-	1	0	0	0	1	GTATGC	0	1	1	0	1	0	GACTAGC	2	117636
chrXV	139435	+	chrXV:139377:139435:+	0	1	0	0	1	GTAAGT	0	1	1	0	1	0	TACTGAC	1	139435
chrXV	240976	-	chrXV:240976:241024:-	1	1	1	1	1	GTAAGT	1	0	0	0	0	0	GACTAAC	1	240976
chrXV	242453	-	chrXV:242453:242503:-	1	1	1	1	0	GTATGT	1	0	0	0	0	0	TACTAAC	0	242453
chrXV	249914	+	chrXV:249872:249914:+	0	1	0	0	3	ATCGGT	0	1	0	0	0	0	TATTAAC	1	249914
chrXV	325376	-	chrXV:325376:325450:-	1	1	0	0	2	GTATCG	0	1	0	0	0	0	TACTAAC	0	325376
chrXV	349520	-	chrXV:349520:349598:-	1	0	0	0	0	GTATGT	0	1	1	0	1	0	TACTAAG	1	349522
chrXV	418634	+	chrXV:418565:418634:+	0	1	0	0	1	GTATGA	0	1	1	0	1	0	TTCTAAC	1	418634
chrXV	423676	-	chrXV:423676:423735:-	1	1	0	0	1	GTATGG	0	1	1	0	1	0	TACTGAC	1	423676
chrXV	437797	-	chrXV:437797:437846:-	0	1	0	0	1	GTATAT	0	1	1	0	1	0	TACTAAC	0	437797
chrXV	448694	+	chrXV:448667:448694:+	1	0	0	0	3	TAATAT	0	1	0	0	0	0	AAAAAAA	4	448694
chrXV	505980	+	chrXV:505939:505980:+	1	0	0	1	0	GTATGT	0	1	1	1	0	0	GAGTAAC	2	505983
chrXV	506800	-	chrXV:506800:506870:-	1	0	0	0	1	GTATTT	0	0	0	0	0	0	TACTAAC	0	506802
chrXV	506802	-	chrXV:506802:506870:-	0	1	0	0	1	GTATTT	0	1	1	0	1	0	TACTAAC	0	506802
chrXV	518763	-	chrXV:518763:518826:-	1	0	0	0	1	ATATGT	0	0	0	0	0	0	TACTAAC	0	518765
chrXV	518765	-	chrXV:518765:518826:-	0	1	0	0	1	ATATGT	0	1	1	0	1	0	TACTAAC	0	518765
chrXV	527238	+	chrXV:527186:527238:+	0	1	0	0	1	GTATGA	0	1	1	0	1	0	TACTAAT	1	527238
chrXV	594353	-	chrXV:594353:594426:-	1	0	0	0	5	GCGCAA	0	1	0	0	0	0	TGCAAAA	3	594341
chrXV	605430	+	chrXV:605379:605430:+	0	1	0	0	1	GTACGT	0	1	1	0	1	0	AACTAAC	1	605430
chrXV	630886	-	chrXV:630886:630936:-	0	1	0	0	2	GTATAG	0	1	0	0	0	0	AACTAAC	1	630886
chrXV	674438	-	chrXV:674438:674504:-	0	1	0	0	1	GTATGA	0	1	1	0	1	0	GACTAAC	1	674438
chrXV	720497	+	chrXV:720444:720497:+	1	0	0	0	0	GTATGT	0	0	0	0	0	0	TATTAAC	1	720500
chrXV	720500	+	chrXV:720444:720500:+	0	1	0	0	0	GTATGT	0	1	1	0	1	0	TATTAAC	1	720500
chrXV	733353	-	chrXV:733353:733417:-	1	0	0	0	1	GCATGT	0	0	0	0	0	0	AACTAAC	1	733356
chrXV	733356	-	chrXV:733356:733417:-	0	1	0	0	1	GCATGT	0	1	1	0	1	0	AACTAAC	1	733356
chrXV	754238	-	chrXV:754238:754290:-	0	1	0	0	1	GTAAGT	0	1	1	0	1	0	AACTAAC	1	754238
chrXV	778910	-	chrXV:778910:778959:-	0	1	1	0	4	GTCGAA	1	0	0	0	0	0	TACTAAC	0	778910
chrXV	791704	-	chrXV:791704:791753:-	1	1	0	0	2	TTACGT	0	1	0	0	0	0	TACTAAC	0	791704
chrXV	819160	+	chrXV:819077:819160:+	0	1	0	0	1	GTCTGT	0	1	1	0	1	0	TACTGAC	1	819160
chrXV	836399	-	chrXV:836399:836448:-	0	1	0	0	2	ATATTT	0	1	0	0	0	0	ATCTAAC	2	836399
chrXV	845020	+	chrXV:844959:845020:+	1	0	0	0	0	GTATGT	0	0	0	0	0	0	ATCTAAC	2	845023
chrXV	845023	+	chrXV:844959:845023:+	0	1	0	0	0	GTATGT	0	1	1	0	1	0	ATCTAAC	2	845023
chrXV	867516	+	chrXV:867439:867516:+	0	1	1	0	3	GTAAAA	1	0	0	0	0	0	TACTAAC	0	867516
chrXV	900802	-	chrXV:900802:900850:-	1	1	1	0	2	GTAATT	1	0	0	0	0	0	TACTAAC	0	900802
chrXV	930113	+	chrXV:930063:930113:+	1	0	0	0	1	GTAAGT	0	1	1	1	0	1	CGCTAAC	2	930116
chrXV	1003995	-	chrXV:1003995:1004066:-	0	1	0	0	2	GTGAGT	0	1	0	0	0	0	TACTAAC	0	1003995
chrXV	1030464	-	chrXV:1030464:1030507:-	0	1	0	0	4	ATCTAA	0	1	0	0	0	0	AACTAAC	1	1030464
chrXV	1059710	-	chrXV:1059710:1059794:-	0	1	0	0	1	GTAAGT	0	1	1	0	1	0	TACTGAC	1	1059710
chrXV	1062513	-	chrXV:1062513:1062560:-	1	1	0	0	1	GTATGC	0	1	1	0	1	0	TACTAAC	0	1062513
chrXVI	76014	-	chrXVI:76014:76071:-	0	1	1	0	2	GTCTTT	1	0	0	0	0	0	TACTAAC	0	76014
chrXVI	76164	-	chrXVI:76164:76223:-	1	0	0	1	0	GTATGT	0	1	1	0	1	0	CACTAAG	2	76166
chrXVI	96189	-	chrXVI:96189:96233:-	1	1	1	1	0	GTATGT	1	0	0	0	0	0	AATTAAC	2	96189
chrXVI	101223	+	chrXVI:101139:101223:+	0	1	0	0	1	GTAAGT	0	1	1	0	1	0	TATTAAC	1	101223
chrXVI	115267	+	chrXVI:115219:115267:+	1	0	0	1	0	GTATGT	0	0	0	0	0	0	TACTAAC	0	115270
chrXVI	115270	+	chrXVI:115219:115270:+	0	1	0	1	0	GTATGT	0	1	1	0	1	0	TACTAAC	0	115270
chrXVI	146508	-	chrXVI:146508:146597:-	1	1	0	0	1	GTATGA	0	1	1	0	1	0	TACTAAC	0	146508
chrXVI	159663	+	chrXVI:159585:159663:+	0	1	0	0	1	GTAAGT	0	1	1	0	1	0	TACTAAC	0	159663
chrXVI	174036	+	chrXVI:173971:174036:+	1	1	1	0	3	GTTTTA	1	0	0	0	0	0	TACTAAC	0	174036
chrXVI	196571	-	chrXVI:196571:196616:-	0	1	0	0	1	GTATGG	0	1	1	0	1	0	ATCTAAC	2	196571
chrXVI	218695	+	chrXVI:218646:218695:+	1	0	0	1	0	GTATGT	0	1	1	1	0	0	GAAGATC	4	218690
chrXVI	218711	+	chrXVI:218646:218711:+	1	1	1	1	0	GTATGT	1	0	0	0	0	0	TACTAAC	0	218711
chrXVI	231558	+	chrXVI:231499:231558:+	1	0	0	0	2	GTAAGA	0	0	0	0	0	0	TACTAAC	0	231561
chrXVI	231561	+	chrXVI:231499:231561:+	0	1	0	0	2	GTAAGA	0	1	0	0	0	0	TACTAAC	0	231561
chrXVI	281450	-	chrXVI:281450:281502:-	1	0	0	1	0	GTATGT	0	1	1	0	1	0	CAATAAT	3	281450
chrXVI	305374	+	chrXVI:305306:305374:+	1	1	1	1	0	GTATGT	1	0	0	0	0	0	TACTAAC	0	305374
chrXVI	335968	+	chrXVI:335905:335968:+	1	0	0	0	0	GTATGT	0	1	1	0	1	0	TACTTAC	1	335970
chrXVI	339246	+	chrXVI:339174:339246:+	0	1	0	0	1	GTATAT	0	1	1	0	1	0	TATTAAC	1	339246
chrXVI	339306	+	chrXVI:339230:339306:+	0	1	0	0	1	GTAAGT	0	1	1	0	1	0	TACTGAC	1	339306
chrXVI	345483	-	chrXVI:345483:345574:-	0	1	1	0	4	TAACGG	1	0	0	0	0	0	TACTAAC	0	345483
chrXVI	405426	+	chrXVI:405372:405426:+	0	1	1	0	3	ATTTAT	1	0	0	0	0	0	CACTAAC	1	405426
chrXVI	407002	+	chrXVI:406952:407002:+	1	1	1	0	1	GTGTGT	1	0	0	0	0	0	TACTAAC	0	407002
chrXVI	412958	+	chrXVI:412887:412958:+	1	1	1	0	2	TAATGT	1	0	0	0	0	0	TACTAAC	0	412958
chrXVI	445520	-	chrXVI:445520:445573:-	1	1	0	0	1	GTGTGT	0	1	1	0	1	0	GACTAAC	1	445520
chrXVI	481182	-	chrXVI:481182:481238:-	1	0	0	0	1	GTACGT	0	0	0	0	0	0	CACTAAC	1	481184
chrXVI	481184	-	chrXVI:481184:481238:-	0	1	0	0	1	GTACGT	0	1	1	0	1	0	CACTAAC	1	481184
chrXVI	490810	-	chrXVI:490810:490857:-	0	1	0	0	1	GTAAGT	0	1	1	0	1	0	TATTAAC	1	490810
chrXVI	492958	-	chrXVI:492958:493018:-	1	1	1	1	0	GTATGT	1	0	0	0	0	0	TACTAAC	0	492958
chrXVI	513416	-	chrXVI:513416:513466:-	0	1	0	0	1	GTATGG	0	1	1	1	0	0	TACTAAA	1	513407
chrXVI	560471	+	chrXVI:560413:560471:+	0	1	0	0	1	GTAAGT	0	1	1	0	1	0	TACTAAT	1	560471
chrXVI	579896	-	chrXVI:579896:579965:-	0	1	0	0	1	GTATGA	0	1	1	0	1	0	TATTAAC	1	579896
chrXVI	584022	-	chrXVI:584022:584078:-	1	0	0	0	2	GTATTG	0	0	0	0	0	0	TACTGAC	1	584024
chrXVI	584024	-	chrXVI:584024:584078:-	0	1	0	0	2	GTATTG	0	1	0	0	0	0	TACTGAC	1	584024
chrXVI	590145	-	chrXVI:590145:590200:-	0	1	0	0	1	ATATGT	0	1	1	0	1	0	TACTGAC	1	590145
chrXVI	593080	-	chrXVI:593080:593139:-	1	0	0	0	2	GTATAA	0	0	0	0	0	0	AACTAAC	1	593082
chrXVI	593082	-	chrXVI:593082:593139:-	0	1	0	0	2	GTATAA	0	1	0	0	0	0	AACTAAC	1	593082
chrXVI	602284	-	chrXVI:602284:602338:-	1	0	0	0	0	GTATGT	0	1	1	0	1	0	TACTAAA	1	602282
chrXVI	616652	+	chrXVI:616593:616652:+	0	1	0	0	0	GTATGT	0	1	1	0	1	0	TACTAAT	1	616652
chrXVI	617123	+	chrXVI:617066:617123:+	0	1	0	0	1	GTAAGT	0	1	1	0	1	0	TATTAAC	1	617123
chrXVI	623662	+	chrXVI:623575:623662:+	1	1	1	1	0	GTATGT	1	0	0	0	0	0	TACTAAC	0	623662
chrXVI	654534	+	chrXVI:654471:654534:+	0	1	1	0	2	GTATAA	1	0	0	0	0	0	TACTAAC	0	654534
chrXVI	656521	-	chrXVI:656521:656572:-	1	1	0	0	2	GTAGTT	0	1	0	0	0	0	TACTAAC	0	656521
chrXVI	678219	-	chrXVI:678219:678276:-	1	1	1	1	0	GTATGT	1	0	0	0	0	0	TACTAAC	0	678219
chrXVI	685776	+	chrXVI:685691:685776:+	0	1	0	0	1	GTAGGT	0	1	1	0	1	0	AACTAAT	2	685776
chrXVI	717058	-	chrXVI:717058:717144:-	0	1	0	0	1	GTATGC	0	1	1	0	1	1	TACTAAC	0	717058
chrXVI	729395	-	chrXVI:729395:729479:-	1	0	0	1	0	GTATGT	0	1	1	0	1	0	TACCAAC	1	729397
chrXVI	729414	-	chrXVI:729414:729479:-	1	1	1	1	0	GTATGT	1	0	0	0	0	0	GACTAAC	1	729414
chrXVI	739748	-	chrXVI:739748:739794:-	1	0	0	0	2	GTAAGC	0	0	0	0	0	0	TATTAAC	1	739750
chrXVI	739750	-	chrXVI:739750:739794:-	0	1	0	0	2	GTAAGC	0	1	0	0	0	0	TATTAAC	1	739750
chrXVI	745392	+	chrXVI:745342:745392:+	0	1	0	0	2	TAATGT	0	1	0	0	0	0	CACTAAC	1	745392
chrXVI	777582	-	chrXVI:777582:777639:-	1	0	0	0	1	GTAAGT	0	1	1	0	1	0	AACTAGC	2	777580
chrXVI	800194	+	chrXVI:800147:800194:+	0	1	0	0	5	AACTTC	0	1	0	0	0	0	TACTAAT	1	800194
chrXVI	824942	-	chrXVI:824942:825021:-	0	1	0	0	2	GTGCGT	0	1	0	0	0	0	CACTAAC	1	824942
chrXVI	833779	+	chrXVI:833690:833779:+	1	1	1	1	0	GTATGT	1	0	0	0	0	0	AACTAAC	1	833779
chrXVI	841160	+	chrXVI:841109:841160:+	0	1	0	0	2	GAAAGT	0	1	0	0	0	0	AACTAAC	1	841160
chrXVI	883453	+	chrXVI:883384:883453:+	1	1	1	1	0	GTATGT	1	0	0	0	0	0	TACTAAC	0	883453
chrXVI	883586	-	chrXVI:883586:883649:-	1	0	0	0	1	GTATAT	0	0	0	0	0	0	GACTAAC	1	883588
chrXVI	883588	-	chrXVI:883588:883649:-	0	1	0	0	1	GTATAT	0	1	1	0	1	0	GACTAAC	1	883588
chrXVI	911328	+	chrXVI:911273:911328:+	1	1	1	1	0	GTATGT	1	0	0	0	0	0	TACTAAC	0	911328
chrXVI	937232	-	chrXVI:937232:937285:-	0	1	0	0	2	GTATAC	0	1	0	0	0	0	TACTAAT	1	937232
chrXVI	937537	-	chrXVI:937537:937617:-	1	0	0	0	0	GTATGT	0	1	1	0	1	0	TACTAAA	1	937535
chrXVI	939905	-	chrXVI:939905:939951:-	1	0	0	0	3	GTACCG	0	0	0	0	0	0	TACTAAC	0	939907
chrXVI	939907	-	chrXVI:939907:939951:-	0	1	0	0	3	GTACCG	0	1	0	0	0	0	TACTAAC	0	939907
totals										198	430	268	21	247	22
5ss_bp_pair is in the format chr:nt1:nt2:strand
nt1 < nt2
On the plus strand, nt1 is the 5'ss and nt2 is the BP
On the reverse strand, nt1 is the BP and nt2 is the 5'SS
In general 1=true, 0=false, excepet for 5ss_mm, the number of mismatches at the 5'ss from GTATGT, and best_bp_mm from TACTAAC
u_a and u_n are the union of annotated and novel BP, respectively, of both peak callers
lcnBP= low confidence novel BP (see supplemental methods for details)
hcnBP = high confidence novel BP (see supplemental methods for details)
