# Supplementary material
Source: HighWire-hosted journal article supplement (doi:10.1101/rna.057216.116)
Supplement: Supplemental_TableS3.xlsx [file Supplemental_TableS3.xlsx]

## Sheet: Sheet1
Table S3. GTATGT motif frequency at 5'SS and generally in introns.
No. mismatches from /GTATGT	0	1	2	3	4	5	6	total	0 or 1 mut	% 0 or 1 mut
Annotated 5'SS	216	73	6	18	7	7	3	330	289	87.58
Annotated 5'SS, no chrM	216	73	6	1	2	0	0	298	289	96.98
Arbitrary intron positions	10	24	130	471	982	973	390	2980	34	1.1
