# Supplementary material
Source: HighWire-hosted journal article supplement (doi:10.1101/rna.057216.116)
Supplement: Supplemental_TableS4.xlsx [file Supplemental_TableS4.xlsx]

## Sheet: Sheet1
Table S4. Branch-seq CPMs.
bp_id	branch_seq_cpm	gene_name	bp_type
chrVII:497961:-	476.727	YGR001C	annotated
chrXIII:123777:-	1.12652	YML073C	annotated
chrV:433162:+	0.292061	YER133W	annotated
chrV:308040:+	205.903	YER074W-A	annotated
chrV:307801:+	248.126	YER074W-A	annotated
chrV:269803:-	0.0834459	YER056C-A	annotated
chrV:348217:-	221.758	YER093C-A	annotated
chrV:148254:+	301.991	YEL003W	annotated
chrV:239667:-	0.751013	YER044C-A	annotated
chrV:131853:+	160.383	YEL012W	annotated
chrV:159013:-	674.452	YER003C	annotated
chrV:548611:+	1.37686	YER179W	annotated
chrV:166786:-	251.256	YER007C-A	annotated
chrV:397225:+	0.333784	YER117W	annotated
chrII:462255:+	274.036	YBR111W-A	annotated
chrII:479389:+	247.96	YBR119W	annotated
chrII:602175:+	2.71199	YBR186W	annotated
chrII:606615:+	0.917905	YBR191W	annotated
chrII:653429:+	196.307	YBR215W	annotated
chrII:170771:+	29.9571	YBL026W	annotated
chrII:110932:+	198.518	YBL059W	annotated
chrII:333365:+	7.0929	YBR048W	annotated
chrII:110451:-	375.59	YBL059C-A	annotated
chrII:186375:-	513.151	YBL018C	annotated
chrII:462472:+	79.1902	YBR111W-A	annotated
chrII:142787:-	241.993	YBL040C	annotated
chrII:47071:-	44.4767	YBL091C-A	annotated
chrII:168770:+	0.166892	YBL027W	annotated
chrII:426524:-	0.458953	YBR090C	annotated
chrII:125234:+	112.193	YBL050W	annotated
chrII:366534:-	129.049	YBR062C	annotated
chrII:726947:-	120.997	YBR255C-A	annotated
chrII:679973:-	102.68	YBR230C	annotated
chrII:407047:-	2316.33	YBR082C	annotated
chrVI:64615:-	0.458953	YFL034C-A	annotated
chrVI:221291:-	3.00405	YFR031C-A	annotated
chrVI:242044:+	349.597	YFR045W	annotated
chrVI:63915:-	332.365	YFL034C-B	annotated
chrVI:203304:-	787.229	YFR024C-A	annotated
chrXIV:62407:-	0.166892	YNL302C	annotated
chrXIV:534915:-	362.197	YNL050C	annotated
chrXIV:494551:-	3.50473	YNL069C	annotated
chrXIV:623270:+	0.0834459	YNL004W	annotated
chrXIV:351021:+	438.216	YNL147W	annotated
chrXIV:545341:+	1186.73	YNL044W	annotated
chrXIV:48377:+	87.7851	YNL312W	annotated
chrXIV:331803:+	0.500676	YNL162W	annotated
chrXIV:185553:+	134.306	YNL246W	annotated
chrXIV:145191:-	172.942	YNL265C	annotated
chrXIV:609837:+	1.25169	YNL012W	annotated
chrXIV:366096:+	225.137	YNL138W-A	annotated
chrXIV:380726:-	537.434	YNL130C	annotated
chrXIV:415872:+	0.292061	YNL112W	annotated
chrXIV:557672:+	334.66	YNL038W	annotated
chrXVI:96189:-	218.837	YPL241C	annotated
chrXVI:492958:-	403.211	YPL031C	annotated
chrXVI:623662:+	391.153	YPR028W	annotated
chrXVI:729414:-	126.379	YPR098C	annotated
chrXVI:407002:+	9.67973	YPL079W	annotated
chrXVI:305374:+	165.932	YPL129W	annotated
chrXVI:883453:+	202.148	YPR170W-B	annotated
chrXVI:678219:-	565.471	YPR063C	annotated
chrXVI:345483:-	0.0834459	YPL109C	annotated
chrXVI:76014:-	0.166892	YPL249C-A	annotated
chrXVI:218711:+	254.385	YPL175W	annotated
chrXVI:654534:+	0.292061	YPR043W	annotated
chrXVI:405426:+	0.0834459	YPL081W	annotated
chrXVI:911328:+	1047.66	YPR187W	annotated
chrXVI:833779:+	136.893	YPR153W	annotated
chrXVI:412958:+	28.8723	YPL075W	annotated
chrXVI:174036:+	0.792736	YPL198W	annotated
chrXI:625594:+	630.601	YKR095W-A	annotated
chrXI:447376:-	229.268	YKR004C	annotated
chrXI:430163:-	132.137	YKL006C-A	annotated
chrXI:283016:+	0.292061	YKL081W	annotated
chrXI:437526:+	592.633	YKL002W	annotated
chrXI:449611:-	5.13193	YKR005C	annotated
chrXI:83061:+	319.473	YKL190W	annotated
chrXI:618096:-	15.6461	YKR094C	annotated
chrVII:543708:+	129.633	YGR029W	annotated
chrVII:946407:+	1.00135	YGR225W	annotated
chrVII:497394:-	401.959	YGR001C	annotated
chrVII:157245:-	3.21267	YGL183C	annotated
chrVII:435728:+	0.166892	YGL033W	annotated
chrVII:346854:-	32.085	YGL087C	annotated
chrVII:73034:-	19.6515	YGL226C-A	annotated
chrVII:311486:+	0.667567	YGL103W	annotated
chrVII:556282:+	0.625845	YGR034W	annotated
chrVII:62173:+	317.095	YGL232W	annotated
chrX:702871:-	0.166892	YJR145C	annotated
chrX:387380:-	414.559	YJL031C	annotated
chrX:435302:+	207.321	YJL001W	annotated
chrX:76268:+	0.0834459	YJL189W	annotated
chrX:74178:+	31.3339	YJL191W	annotated
chrX:365853:+	441.012	YJL041W	annotated
chrX:608540:+	0.792736	YJR094W-A	annotated
chrX:396512:-	329.319	YJL024C	annotated
chrX:469190:-	15.4792	YJR021C	annotated
chrX:50351:-	77.0206	YJL205C	annotated
chrXV:93868:-	0.0834459	YOL120C	annotated
chrXV:240976:-	344.966	YOL048C	annotated
chrXV:778910:-	0.0834459	YOR234C	annotated
chrXV:867516:+	0.542399	YOR293W	annotated
chrXV:242453:-	19.6098	YOL047C	annotated
chrXV:92476:-	51.4444	YOL121C	annotated
chrXV:900802:-	1.58547	YOR312C	annotated
chrIX:166484:+	603.314	YIL106W	annotated
chrIX:232012:-	1.29341	YIL069C	annotated
chrIX:225834:-	0.0834459	YIL073C	annotated
chrIX:317136:+	0.542399	YIL018W	annotated
chrIX:47743:+	547.113	YIL156W-B	annotated
chrIX:155276:+	275.33	YIL111W	annotated
chrIX:348380:-	0.500676	YIL004C	annotated
chrXII:522984:+	0.292061	YLR185W	annotated
chrXII:766205:-	535.806	YLR316C	annotated
chrXII:564467:-	31.1253	YLR211C	annotated
chrXII:548706:-	175.153	YLR199C	annotated
chrXII:1024631:+	1.91926	YLR445W	annotated
chrXII:398583:+	89.2872	YLR128W	annotated
chrXII:286498:-	113.028	YLR078C	annotated
chrXII:786667:+	10.848	YLR329W	annotated
chrXII:857038:+	81.4015	YLR367W	annotated
chrXII:40353:-	2850.18	YLL050C	annotated
chrXII:694444:+	310.502	YLR275W	annotated
chrXII:250899:-	1.71064	YLR054C	annotated
chrXII:327295:-	10.5142	YLR093C	annotated
chrXII:744219:+	171.69	YLR306W	annotated
chrXII:766086:-	482.151	YLR316C	annotated
chrXII:987191:+	193.803	YLR426W	annotated
chrXII:242652:+	0.584122	YLR048W	annotated
chrXII:263540:+	0.166892	YLR061W	annotated
chrXIII:337886:+	835.628	YMR033W	annotated
chrXIII:666961:-	225.429	YMR201C	annotated
chrXIII:223421:-	0.292061	YML026C	annotated
chrXIII:499898:-	0.208615	YMR116C	annotated
chrXIII:732835:+	0.0834459	YMR230W	annotated
chrXIII:651593:+	0.166892	YMR194W	annotated
chrXIII:854879:+	223.677	YMR292W	annotated
chrXIII:425113:+	0.0834459	YMR079W	annotated
chrXIII:82343:+	217.293	YML094W	annotated
chrXIII:206162:+	118.452	YML036W	annotated
chrXIII:140113:-	99.5927	YML067C	annotated
chrXIII:537527:+	1.54375	YMR133W	annotated
chrXIII:517842:+	0.0834459	YMR125W	annotated
chrXIII:721231:-	1.4603	YMR225C	annotated
chrXIII:753788:-	0.125169	YMR242C	annotated
chrXIII:652797:-	114.989	YMR194C-B	annotated
chrXIII:211547:+	59.9559	YML034W	annotated
chrXIII:99301:-	437.298	YML085C	annotated
chrXIII:225264:-	634.565	YML025C	annotated
chrIII:111588:-	118.243	YCL002C	annotated
chrIII:177952:-	1.91926	YCR031C	annotated
chrIII:173137:-	618.293	YCR028C-A	annotated
chrIII:101646:-	93.6681	YCL012C	annotated
chrIII:107089:+	297.61	YCL005W-A	annotated
chrIII:107255:+	352.434	YCL005W-A	annotated
chrIV:1212941:+	276.331	YDR367W	annotated
chrIV:1266790:-	144.946	YDR397C	annotated
chrIV:1237581:+	3.37956	YDR381W	annotated
chrIV:1103871:+	150.829	YDR318W	annotated
chrIV:1073346:-	150.912	YDR305C	annotated
chrIV:1450485:-	1.96098	YDR500C	annotated
chrIV:491873:+	0.166892	YDR025W	annotated
chrIV:65358:+	205.986	YDL219W	annotated
chrIV:1238769:-	150.787	YDR381C-A	annotated
chrIV:1319751:-	113.278	YDR424C	annotated
chrIV:254999:-	439.134	YDL115C	annotated
chrIV:267780:+	101.554	YDL108W	annotated
chrIV:239421:-	415.269	YDL125C	annotated
chrIV:217970:+	0.41723	YDL136W	annotated
chrIV:431423:-	1294.87	YDL012C	annotated
chrIV:337596:+	331.698	YDL064W	annotated
chrIV:715265:-	166.475	YDR129C	annotated
chrIV:579963:+	20.6529	YDR064W	annotated
chrIV:399468:+	10.389	YDL029W	annotated
chrIV:630016:+	0.70929	YDR092W	annotated
chrIV:733713:-	307.79	YDR139C	annotated
chrIV:569665:-	153.749	YDR059C	annotated
chrIV:458048:-	576.653	YDR005C	annotated
chrIV:307375:-	0.250338	YDL083C	annotated
chrIV:230262:+	0.0834459	YDL130W	annotated
chrIV:1319627:-	157.254	YDR424C	annotated
chrI:151022:-	100.427	YAL001C	annotated
chrI:87439:+	179.617	YAL030W	annotated
chrVIII:354926:+	255.678	YHR123W	annotated
chrVIII:129611:+	89.1203	YHR012W	annotated
chrVIII:187613:-	1389.92	YHR039C-A	annotated
chrVIII:498731:-	30.4578	YHR199C-A	annotated
chrVIII:382356:-	0.0834459	YHR141C	annotated
chrVIII:298418:-	198.977	YHR097C	annotated
chrVIII:104751:+	0.292061	YHL001W	annotated
chrVIII:255689:-	528.129	YHR077C	annotated
chrVIII:107875:+	674.035	YHR001W-A	annotated
chrVIII:315810:-	286.386	YHR101C	annotated
chrVIII:189778:-	151.788	YHR041C	annotated
chrVIII:251233:+	92.4164	YHR076W	annotated
chrVIII:262372:-	0.0834459	YHR079C-A	annotated
chrVIII:138274:-	0.0834459	YHR016C	annotated
chrV:151105:+	0.625845	not_in_intron_or_TIF	cnBP
chrV:166806:-	0.625845	YER007C-A	cnBP
chrV:540383:-	1.0848	YER175C	cnBP
chrII:115534:+	15.4792	YBL056W	cnBP
chrII:170731:+	24.4497	YBL026W	cnBP
chrII:221024:+	3.0875	not_in_intron_or_TIF	cnBP
chrII:606346:+	0.70929	YBR191W	cnBP
chrII:291715:-	1.00135	YBR025C	cnBP
chrII:592709:-	6.42534	YBR181C	cnBP
chrXVI:218695:+	0.876182	YPL175W	cnBP
chrXVI:335968:+	1.33513	YPL114W	cnBP
chrXVI:76164:-	0.667567	YPL249C-A	cnBP
chrXVI:281450:-	0.667567	snR17b	cnBP
chrXVI:602284:-	4.83986	not_in_intron_or_TIF	cnBP
chrXVI:729395:-	1.4603	YPR098C	cnBP
chrXVI:777582:-	0.834459	not_in_intron_or_TIF	cnBP
chrXVI:937537:-	1.25169	not_in_intron_or_TIF	cnBP
chrXI:96757:+	2.79544	YKL184W	cnBP
chrXI:468921:-	0.917905	YKR015C	cnBP
chrVII:439462:+	5.25709	YGL030W	cnBP
chrVII:543691:+	2.41993	YGR029W	cnBP
chrVII:555885:+	0.542399	YGR034W	cnBP
chrVII:143935:-	6.175	not_in_intron_or_TIF	cnBP
chrVII:497408:-	1.54375	YGR001C	cnBP
chrVII:859434:-	5.79949	YGR183C	cnBP
chrXIII:182669:+	0.959628	YML046W	cnBP
chrXIII:425094:+	0.375507	YMR079W	cnBP
chrXIII:652808:-	3.50473	YMR194C-B	cnBP
chrXV:505980:+	4.96503	YOR096W	cnBP
chrXV:930113:+	2.08615	YOR326W	cnBP
chrXV:117635:-	0.792736	not_in_intron_or_TIF	cnBP
chrXV:349520:-	1.20997	not_in_intron_or_TIF	cnBP
chrIX:155301:+	1.0848	YIL111W	cnBP
chrIX:166501:+	0.70929	YIL106W	cnBP
chrXII:382387:+	3.71334	YLR116W	cnBP
chrXII:286519:-	3.21267	YLR078C	cnBP
chrX:435281:+	1.37686	YJL001W	cnBP
chrIV:107156:+	1.71064	YDL195W	cnBP
chrIV:392638:+	0.500676	not_in_intron_or_TIF	cnBP
chrIV:438275:+	1.75236	YDL007W	cnBP
chrIV:655244:+	1.96098	YDR100W	cnBP
chrIV:1145148:+	30.3743	YDR336W	cnBP
chrIV:22303:-	3.75507	not_in_intron_or_TIF	cnBP
chrIV:451430:-	4.13057	YDR001C	cnBP
chrVIII:129590:+	0.751013	YHR012W	cnBP
chrVIII:406673:-	0.959628	not_in_intron_or_TIF	cnBP
chrV:61194:+	0.166892	not_in_intron_or_TIF	cnBP
chrV:124638:-	0.667567	YEL016C	cnBP
chrV:160514:+	0.375507	YER004W, YER005W	cnBP
chrV:201997:+	46.4377	YER023W	cnBP
chrV:203928:+	0.333784	YER024W	cnBP
chrV:305684:+	9.2625	YER073W	cnBP
chrV:336936:+	1.54375	YER088W-B	cnBP
chrV:362830:+	1.75236	YER102W	cnBP
chrV:374671:-	2.46166	YER107C	cnBP
chrV:487859:+	0.625845	not_in_intron_or_TIF	cnBP
chrV:517901:+	395.367	YER167W	cnBP
chrV:561245:+	0.0834459	not_in_intron_or_TIF	cnBP
chrII:13949:-	0.959628	not_in_intron_or_TIF	cnBP
chrII:76231:+	0.751013	not_in_intron_or_TIF	cnBP
chrII:167927:+	0.166892	not_in_intron_or_TIF	cnBP
chrII:206284:+	0.125169	not_in_intron_or_TIF	cnBP
chrII:290470:-	0.0834459	YBR025C	cnBP
chrII:331391:-	5.0902	YBR046C	cnBP
chrII:341038:-	0.751013	not_in_intron_or_TIF	cnBP
chrII:342756:+	5.50743	not_in_intron_or_TIF	cnBP
chrII:431594:-	0.500676	not_in_intron_or_TIF	cnBP
chrII:443734:-	32.2936	YBR101C	cnBP
chrII:519067:-	0.292061	not_in_intron_or_TIF	cnBP
chrII:756982:-	0.250338	not_in_intron_or_TIF	cnBP
chrVI:32028:-	0.625845	not_in_intron_or_TIF	cnBP
chrVI:96258:+	1.20997	YFL021W	cnBP
chrVI:109969:-	0.292061	not_in_intron_or_TIF	cnBP
chrVI:176327:-	3.75507	YFR015C	cnBP
chrVI:268722:+	0.375507	not_in_intron_or_TIF	cnBP
chrXIV:69244:+	0.834459	YNL298W	cnBP
chrXIV:217113:-	0.542399	YNL231C	cnBP
chrXIV:250194:-	0.0834459	YNL211C	cnBP
chrXIV:273231:+	0.125169	not_in_intron_or_TIF	cnBP
chrXIV:349280:-	0.125169	YNL149C	cnBP
chrXIV:359077:-	0.0834459	not_in_intron_or_TIF	cnBP
chrXIV:369425:-	0.125169	YNL137C	cnBP
chrXIV:373658:+	2.08615	not_in_intron_or_TIF	cnBP
chrXIV:380702:-	16.6057	YNL130C	cnBP
chrXIV:394037:+	0.584122	YNL124W	cnBP
chrXIV:427177:+	1.71064	not_in_intron_or_TIF	cnBP
chrXIV:429575:-	8.88699	not_in_intron_or_TIF	cnBP
chrXIV:429599:-	0.458953	not_in_intron_or_TIF	cnBP
chrXIV:583910:-	3.54645	YNL025C	cnBP
chrXIV:611579:+	4.46436	YNL012W	cnBP
chrXIV:726914:-	0.125169	not_in_intron_or_TIF	cnBP
chrXVI:101222:+	0.208615	YPL237W	cnBP
chrXVI:115269:+	65.7554	YPL230W	cnBP
chrXVI:146507:-	10.9314	not_in_intron_or_TIF	cnBP
chrXVI:159662:+	0.208615	YPL208W	cnBP
chrXVI:196570:-	0.125169	YPL184C	cnBP
chrXVI:339245:+	0.0834459	not_in_intron_or_TIF	cnBP
chrXVI:339305:+	0.0834459	not_in_intron_or_TIF	cnBP
chrXVI:445519:-	3.6299	not_in_intron_or_TIF	cnBP
chrXVI:481183:-	4.0054	YPL037C	cnBP
chrXVI:490809:-	0.333784	YPL032C	cnBP
chrXVI:513415:-	0.125169	YPL020C	cnBP
chrXVI:560470:+	0.500676	not_in_intron_or_TIF	cnBP
chrXVI:579895:-	0.333784	YPR010C	cnBP
chrXVI:590144:-	0.125169	YPR015C	cnBP
chrXVI:616651:+	0.125169	not_in_intron_or_TIF	cnBP
chrXVI:617122:+	0.125169	not_in_intron_or_TIF	cnBP
chrXVI:685775:+	0.0834459	YPR070W	cnBP
chrXVI:717057:-	0.41723	YPR091C	cnBP
chrXVI:883587:-	2.04443	not_in_intron_or_TIF	cnBP
chrXI:93384:-	13.3931	YKL186C	cnBP
chrXI:94081:-	5.21537	not_in_intron_or_TIF	cnBP
chrXI:158626:-	0.0834459	not_in_intron_or_TIF	cnBP
chrXI:166478:+	4.46436	YKL150W	cnBP
chrXI:191089:-	0.0834459	YKL134C	cnBP
chrXI:193010:-	38.8024	YKL133C	cnBP
chrXI:225774:-	3.67162	not_in_intron_or_TIF	cnBP
chrXI:231492:+	0.458953	YKL109W	cnBP
chrXI:272947:-	0.834459	not_in_intron_or_TIF	cnBP
chrXI:285868:+	0.625845	YKL080W	cnBP
chrXI:290610:-	0.959628	not_in_intron_or_TIF	cnBP
chrXI:408146:+	25.7431	YKL015W	cnBP
chrXI:446830:-	0.292061	YKR004C	cnBP
chrXI:490071:+	6.7174	not_in_intron_or_TIF	cnBP
chrXI:633804:-	0.208615	YKR098C	cnBP
chrXI:649449:+	0.0834459	not_in_intron_or_TIF	cnBP
chrVII:51958:+	0.375507	YGL238W	cnBP
chrVII:59556:+	0.125169	YGL233W	cnBP
chrVII:140633:+	0.0834459	not_in_intron_or_TIF	cnBP
chrVII:167430:+	6.00811	YGL178W	cnBP
chrVII:253205:-	95.1701	YGL136C	cnBP
chrVII:262616:-	0.0834459	not_in_intron_or_TIF	cnBP
chrVII:293422:+	0.0834459	YGL114W	cnBP
chrVII:293817:+	0.751013	YGL114W	cnBP
chrVII:345543:-	0.125169	not_in_intron_or_TIF	cnBP
chrVII:380660:-	0.0834459	YGL065C	cnBP
chrVII:383554:+	94.4608	YGL063W	cnBP
chrVII:414313:+	0.041723	YGL045W	cnBP
chrVII:423867:-	0.333784	not_in_intron_or_TIF	cnBP
chrVII:427172:-	0.375507	YGL037C	cnBP
chrVII:436364:+	39.9289	not_in_intron_or_TIF	cnBP
chrVII:504217:-	0.125169	not_in_intron_or_TIF	cnBP
chrVII:574777:+	1.91926	not_in_intron_or_TIF	cnBP
chrVII:593472:+	0.292061	not_in_intron_or_TIF	cnBP
chrVII:594140:-	1.04307	not_in_intron_or_TIF	cnBP
chrVII:607018:-	0.375507	not_in_intron_or_TIF	cnBP
chrVII:658296:+	0.0834459	YGR089W	cnBP
chrVII:682969:-	0.0834459	not_in_intron_or_TIF	cnBP
chrVII:730063:+	0.0834459	not_in_intron_or_TIF	cnBP
chrVII:772104:+	0.41723	YGR141W	cnBP
chrVII:792327:-	0.625845	YGR150C	cnBP
chrVII:875660:+	0.125169	not_in_intron_or_TIF	cnBP
chrVII:914790:-	0.667567	YGR210C	cnBP
chrVII:962303:+	0.667567	not_in_intron_or_TIF	cnBP
chrVII:1002936:+	0.166892	not_in_intron_or_TIF	cnBP
chrVII:1052638:-	0.333784	not_in_intron_or_TIF	cnBP
chrXIII:56618:+	0.250338	YML106W	cnBP
chrXIII:112660:-	0.208615	YML076C	cnBP
chrXIII:204536:-	0.584122	not_in_intron_or_TIF	cnBP
chrXIII:242968:-	0.500676	YML015C	cnBP
chrXIII:273520:-	0.458953	not_in_intron_or_TIF	cnBP
chrXIII:301516:-	0.41723	YMR015C	cnBP
chrXIII:493957:+	0.125169	not_in_intron_or_TIF	cnBP
chrXIII:551142:-	6.04983	YMR142C	cnBP
chrXIII:559830:+	128.548	not_in_intron_or_TIF	cnBP
chrXIII:637453:+	0.667567	YMR189W	cnBP
chrXIII:647112:+	1.16824	YMR192W	cnBP
chrXIII:649541:-	0.125169	not_in_intron_or_TIF	cnBP
chrXIII:653956:-	0.166892	not_in_intron_or_TIF	cnBP
chrXIII:701813:+	0.166892	YMR217W	cnBP
chrXIII:810474:-	0.292061	YMR272C	cnBP
chrXIII:845438:-	0.0834459	not_in_intron_or_TIF	cnBP
chrXV:87614:+	0.667567	YOL123W	cnBP
chrXV:139434:+	0.208615	not_in_intron_or_TIF	cnBP
chrXV:418633:+	0.125169	not_in_intron_or_TIF	cnBP
chrXV:423675:-	1.29341	YOR049C	cnBP
chrXV:437796:-	0.458953	not_in_intron_or_TIF	cnBP
chrXV:506801:-	16.6892	YOR097C	cnBP
chrXV:518764:-	2.71199	not_in_intron_or_TIF	cnBP
chrXV:527237:+	0.41723	YOR109W	cnBP
chrXV:605429:+	0.292061	not_in_intron_or_TIF	cnBP
chrXV:674437:-	0.0834459	YOR180C	cnBP
chrXV:720499:+	2.75372	not_in_intron_or_TIF	cnBP
chrXV:733355:-	7.76047	YOR207C	cnBP
chrXV:754237:-	0.166892	not_in_intron_or_TIF	cnBP
chrXV:819159:+	0.125169	YOR264W	cnBP
chrXV:845022:+	13.0593	not_in_intron_or_TIF	cnBP
chrXV:1059709:-	0.125169	not_in_intron_or_TIF	cnBP
chrXV:1062512:-	1.87753	not_in_intron_or_TIF	cnBP
chrIX:54026:+	0.834459	YIL153W	cnBP
chrIX:127053:-	1.12652	not_in_intron_or_TIF	cnBP
chrIX:134040:+	8.63665	YIL121W	cnBP
chrIX:225116:+	0.166892	not_in_intron_or_TIF	cnBP
chrIX:261766:+	1.71064	not_in_intron_or_TIF	cnBP
chrIX:334600:-	0.208615	not_in_intron_or_TIF	cnBP
chrIX:360694:-	0.166892	not_in_intron_or_TIF	cnBP
chrXII:50297:+	1.87753	YLL043W	cnBP
chrXII:90638:+	0.250338	YLL026W	cnBP
chrXII:155741:-	0.792736	YLR002C	cnBP
chrXII:232370:+	0.166892	not_in_intron_or_TIF	cnBP
chrXII:316897:+	0.292061	YLR088W	cnBP
chrXII:331859:-	0.584122	YLR095C	cnBP
chrXII:380684:+	0.458953	YLR115W	cnBP
chrXII:382366:+	1.41858	YLR116W	cnBP
chrXII:491545:+	3.83851	not_in_intron_or_TIF	cnBP
chrXII:522715:+	14.5613	YLR185W	cnBP
chrXII:609447:-	7.88564	YLR233C	cnBP
chrXII:791911:-	0.0834459	not_in_intron_or_TIF	cnBP
chrXII:823170:+	0.292061	not_in_intron_or_TIF	cnBP
chrXII:918954:-	0.458953	YLR398C	cnBP
chrXII:928301:-	0.667567	not_in_intron_or_TIF	cnBP
chrXII:965102:+	0.0834459	not_in_intron_or_TIF	cnBP
chrXII:982469:-	71.847	not_in_intron_or_TIF	cnBP
chrXII:987203:+	7.96909	YLR426W	cnBP
chrXII:987240:+	0.542399	YLR426W	cnBP
chrIII:84709:+	0.0834459	not_in_intron_or_TIF	cnBP
chrIII:120379:+	0.125169	not_in_intron_or_TIF	cnBP
chrIII:169189:-	0.208615	not_in_intron_or_TIF	cnBP
chrIII:228656:+	0.834459	YCR063W	cnBP
chrIII:290580:+	0.166892	YCR095W-A	cnBP
chrX:31820:+	12.1831	YJL213W	cnBP
chrX:209415:+	0.333784	YJL111W	cnBP
chrX:237005:+	0.250338	YJL100W	cnBP
chrX:349225:+	0.500676	not_in_intron_or_TIF	cnBP
chrX:422631:+	4.63125	not_in_intron_or_TIF	cnBP
chrX:455748:+	0.0834459	not_in_intron_or_TIF	cnBP
chrX:506239:+	0.125169	not_in_intron_or_TIF	cnBP
chrX:535286:-	0.125169	not_in_intron_or_TIF	cnBP
chrX:632996:-	59.1632	YJR109C	cnBP
chrX:649521:-	0.125169	not_in_intron_or_TIF	cnBP
chrX:712053:-	0.125169	not_in_intron_or_TIF	cnBP
chrIV:104615:+	0.625845	not_in_intron_or_TIF	cnBP
chrIV:122159:+	465.461	YDL189W	cnBP
chrIV:130328:+	0.208615	YDL185W	cnBP
chrIV:188133:-	0.166892	YDL148C	cnBP
chrIV:232837:+	1.00135	YDL128W	cnBP
chrIV:235107:+	4.63125	YDL127W	cnBP
chrIV:247245:-	0.125169	YDL119C	cnBP
chrIV:268933:-	2.12787	not_in_intron_or_TIF	cnBP
chrIV:331277:+	31.8763	YDL070W	cnBP
chrIV:333709:+	0.250338	not_in_intron_or_TIF	cnBP
chrIV:381064:-	0.166892	YDL040C	cnBP
chrIV:392681:+	0.584122	not_in_intron_or_TIF	cnBP
chrIV:456688:-	1.37686	YDR005C	cnBP
chrIV:540585:+	1.29341	YDR041W	cnBP
chrIV:676357:+	1.33513	YDR110W	cnBP
chrIV:698041:-	0.125169	YDR123C	cnBP
chrIV:721691:-	0.125169	not_in_intron_or_TIF	cnBP
chrIV:768400:-	1.50203	not_in_intron_or_TIF	cnBP
chrIV:929253:+	2.08615	YDR232W	cnBP
chrIV:1021386:+	0.125169	YDR280W	cnBP
chrIV:1080238:-	0.125169	YDR309C	cnBP
chrIV:1081204:+	0.500676	not_in_intron_or_TIF	cnBP
chrIV:1111887:+	0.458953	not_in_intron_or_TIF	cnBP
chrIV:1114334:+	2.37821	not_in_intron_or_TIF	cnBP
chrIV:1333316:-	0.125169	YDR435C	cnBP
chrIV:1490517:-	1.0848	not_in_intron_or_TIF	cnBP
chrIV:1519505:-	0.125169	YDR541C	cnBP
chrI:126071:+	0.166892	YAL016W	cnBP
chrI:134871:-	0.0834459	YAL010C	cnBP
chrI:142343:+	4.29747	YAL003W	cnBP
chrVIII:97941:-	0.166892	YHL007C	cnBP
chrVIII:148769:-	5.67432	not_in_intron_or_TIF	cnBP
chrVIII:335607:-	0.751013	YHR112C	cnBP
chrVIII:372283:+	0.292061	YHR134W	cnBP
chrVIII:400568:-	0.250338	YHR151C	cnBP
chrVIII:442922:+	0.0834459	YHR169W	cnBP
chrVIII:491866:-	0.0834459	not_in_intron_or_TIF	cnBP
The format of the bp_id is chromsome:bp_nucleotide:strand_of_bp
Branch_seq_cpm are the counts per million calculated from all data (top, middle, and bottom slices of gel arc combined).
If the gene_name is “not_in_intron_or_TIF” it did not fall inside a gene according to Pelechano et al. (2013).
Bp_type is “annotated” if the peak fell within 3nt of an annotated BP location according to Meyer et al. (2011).
