# Supplementary material
Source: HighWire-hosted journal article supplement (doi:10.1101/rna.057216.116)
Supplement: Supplemental_TableS6.xlsx [file Supplemental_TableS6.xlsx]

## Sheet: Sheet1
Table S6. Novel splice junctions with entropy ≥ 2bits.
Junction field is the chromosome, first splice site coordinate, second splice site coordinate, and strand joined by colons. The first splice site is always the one more 5' on the chromosome (lower number), so if the strand is “+” the first SS is the 5'SS and if the strand is “-” the first SS is the 3'SS. a_ss1 and a_ss2 are 0 for unannotated splice sites and 1 for annotated splice sites. a_ss_pai…
junction	a_SS1	a_SS2	a_SS_pair	strand	entropy	5ss_long	3ss_long	k_SS1	k_SS2	k_SS_pair	intron_containing_gene	lib_discovered
chrXVI:717048:717146:-	0	0	0	-	2.61058	GTATGCTTTT	CGCTATAAAG	0	0	0	0	polyA
chrVII:72983:73137:-	0	1	0	-	4.2057	GTACGTTGCC	CTTAAGAAAG	2	1	2	1	polyA
chrXIV:494321:494973:-	0	1	0	-	3.23908	GTACGTAAAA	CTCCATCTAG	3	1	3	1	polyA
chrIV:1401795:1402184:+	0	1	0	+	3.66305	GTTGGTACGT	ATTATCGTAG	2	1	2	1	polyA
chrXVI:406645:407019:+	1	0	0	+	3.54093	GTATGTCCAT	AATTTAAAAG	1	2	0	1	polyA
chrXI:618373:618526:-	1	0	0	-	4.1899	GTTTGTTTGT	TTTTGTACAG	1	2	0	1	polyA
chrV:131775:131880:+	1	0	0	+	3.49648	GTATGTTTGA	AACTTCAAAG	1	2	0	1	polyA
chrXIV:443658:444171:-	0	1	0	-	2.32193	GTATGTTAAA	AACCATCTAG	0	1	0	1	polyA
chrIV:601387:601496:+	0	0	0	+	3.72821	ATTGACTATC	AACCAACCAC	0	0	0	0	polyA
chrII:110218:110505:-	0	1	0	-	2.85539	GTAAGTATCC	ATTGAGGAAG	3	1	3	1	polyA
chrXIV:557609:557698:+	1	0	0	+	2.15564	GTATGTATTC	ATTTGCCCAG	1	2	0	1	polyA
chrII:426515:426630:-	2	0	0	-	3.88439	GTAAGTCAGG	ATTAACTTAG	1	2	0	1	polyA
chrXII:242320:242690:+	1	0	0	+	2	GTATGTACAC	GTCCACCAAG	1	2	0	1	polyA
chrII:393179:393507:+	1	0	0	+	4.78195	GTATGTACAC	TTTATCTAAG	1	2	0	1	polyA
chrV:423823:423951:+	0	1	0	+	2.85222	GTAGAGGCAA	TAATTTTTAG	0	1	0	0	polyA
chrX:608481:608581:+	0	1	0	+	2.71929	GTAGGTCCAC	TTTTTTGCAG	0	1	0	1	polyA
chrXIV:331451:331837:+	0	1	0	+	3.38418	GTATAATCTG	TTCTATTTAG	2	1	2	1	polyA
chrXVI:138724:138868:+	1	0	0	+	4.10311	GTATGTTATC	GTACAGTCAG	1	3	0	1	polyA
chrVII:436311:436374:+	0	0	0	+	3.90244	GTATGTATTT	ATCTTTACAG	0	0	0	1	polyA
chrXVI:412311:412995:+	0	0	0	+	3.22872	GTATGGAGTT	ATTGGAACAG	2	2	2	1	polyA
chrIV:308521:308792:+	0	1	0	+	2.48171	GCATGCATAA	ATTATATCAG	0	1	0	1	polyA
chrIII:107032:107304:+	1	0	0	+	2.25163	GTATGTGTCA	AGAAGTACAG	1	0	0	1	polyA
chrII:60188:60697:-	0	1	0	-	2.11808	GTATGTTAAA	AACTAGTTAG	2	1	2	1	polyA
chrXVI:412255:412995:+	0	0	0	+	2.9458	GTATGGTATG	ATTGGAACAG	2	2	2	1	polyA
chrXIII:23359:23654:-	1	0	0	-	3.03064	GTATGCGTTC	TTTACAACAG	1	2	0	1	polyA
chrXII:28461:28834:-	0	0	0	-	2.25163	GTATGACACA	GGATATTAAG	0	0	0	0	polyA
chrIV:1359968:1360373:+	1	0	0	+	4.1003	GTATGTTTAT	TATCAATAAG	1	2	0	1	polyA
chrXIII:551950:552507:+	1	0	0	+	4.12972	GTATGTTTTC	TTTTGGTAAG	1	2	0	1	polyA
chrXIV:185490:185566:+	1	0	0	+	3.78464	GTATGTAGGA	ATGCACTTAG	1	2	0	1	polyA
chrII:168647:168808:+	0	1	0	+	2.59491	GTACGTGTCT	TTTTTCACAG	0	1	0	1	polyA
chrXIII:914403:914648:-	0	0	0	-	2.15597	GTAAGTAAGT	ATGTGGTCAG	0	0	0	0	polyA
chrXIII:424996:425124:+	1	0	0	+	4.52158	GTATGTTGTT	CAAACACAAG	1	2	0	1	polyA
chrIV:216156:216512:+	1	0	0	+	2.92323	GTATGTAACG	AGGAATTAAG	1	0	0	0	polyA
chrVII:311227:311526:+	0	1	0	+	3.44644	GTACTCTTCC	TTTTGTACAG	3	1	3	1	polyA
chrXVI:271302:271896:+	0	0	0	+	2.41938	GTAAGTATGA	GTTCATCAAG	0	0	0	0	polyA
chrVII:365508:365985:-	0	1	0	-	3.19089	GTATGTATAC	TTGACCCCAG	3	1	3	1	polyA
chrXI:551679:552043:+	1	0	0	+	3.02699	GTATGTTCGA	CTACCAACAG	1	2	0	1	polyA
chrXII:242320:243162:+	1	0	0	+	2.48171	GTATGTACAC	TGGTCGACAG	1	3	0	1	polyA
chrVII:555829:556109:+	1	0	0	+	2.98739	GTATGTTTGG	CCGGCTTTAG	1	2	0	1	polyA
chrVII:497364:497999:-	1	1	0	-	2.32193	GTAAGTACAG	TATAAAATAG	1	1	0	1	polyA
chrXI:155270:155636:+	1	0	0	+	4.45807	GTATGTTTAC	AAGTACGAAG	1	2	0	1	polyA
chrVIII:498706:498786:-	0	1	0	-	3.90322	GTATGTCACC	GAAACAACAG	2	1	2	1	polyA
chrVII:253184:253248:-	0	0	0	-	4.79689	GTATGAACCC	CTTATTTTAG	0	0	0	0	polyA
chrIV:417220:417626:-	0	0	0	-	3.28609	GTATGTATTT	ATTGTTATAG	0	0	0	0	polyA
chrIV:629904:630056:+	1	0	0	+	2.66353	GTATGTTCAA	TTTTGTCCAG	1	3	0	1	polyA
chrIV:601314:601470:+	0	0	0	+	3.43162	ATACTACTTA	CACTGAGTAC	0	0	0	0	polyA
chrII:691965:692125:+	0	0	0	+	2.45943	GTATGGAAAC	AGTTTAGAAG	0	0	0	0	polyA
chrXII:233641:233885:-	0	0	0	-	3.45353	GTATGTCTTG	ACCGCCCCAG	0	0	0	0	polyA
chrXI:437836:437925:+	1	0	0	+	2.90161	GTATGTTGTT	CTTTAGAAAG	1	2	0	1	polyA
chrXII:766185:766249:-	0	1	0	-	3.20489	GTATGTATCT	CATATATAAG	3	1	3	1	polyA
chrXIV:557573:557684:+	0	1	0	+	2.75	GTACGTAAAT	AACAATGCAG	2	1	2	1	polyA
chrVII:534472:534781:-	1	0	0	-	2.93558	GTATCTATAA	TTTATCATAG	1	2	0	0	polyA
chrXII:242320:242826:+	1	0	0	+	2.29248	GTATGTACAC	TCTCTTCCAG	1	2	0	1	polyA
chrII:393179:393669:+	1	0	0	+	2.52164	GTATGTACAC	AGTATCCAAG	1	0	0	1	polyA
chrII:691965:692133:+	0	0	0	+	3.86549	GTATGGAAAC	AGGTAAGCAG	0	0	0	0	polyA
chrX:74112:74204:+	0	1	0	+	4.43637	GTTGTTAGAT	TCATGTATAG	2	1	2	1	polyA
chrII:653367:653524:+	1	0	0	+	3.61151	GTATGTTCTG	ACGCAAACAG	1	3	0	1	polyA
chrIV:399360:399495:+	1	0	0	+	2.67034	GTATGTTGTT	CCTTGATCAG	1	2	0	1	polyA
chrI:128520:129021:-	0	0	0	-	3.9554	GTATGGATGT	GCAACAGCAG	0	0	0	0	polyA
chrXIV:616065:616412:+	0	0	0	+	2.97018	GTATGTGCAA	ACTATCAAAG	0	0	0	0	polyA
chrIV:733684:733775:-	0	1	0	-	2.96939	GTATGTTCAT	AAATTAACAG	3	1	3	1	polyA
chrXII:281426:281628:-	0	0	0	-	2.82579	GTAGGTCATG	AACTATCTAG	0	0	0	0	polyA
chrII:142752:142846:-	0	1	0	-	4.03277	GTATGTTACT	GACCATCAAG	2	1	2	1	polyA
chrXIV:185490:185578:+	1	0	0	+	3.96331	GTATGTAGGA	AGTGCGGTAG	1	2	0	1	polyA
chrIV:306804:307073:-	0	0	0	-	3.45656	GTACGTTGAC	GTTAATTTAG	0	0	0	1	polyA
chrI:128523:129021:-	0	0	0	-	3.11058	GTATGGATGT	CCAGCAACAG	0	0	0	0	polyA
chrXIII:557827:558001:-	0	0	0	-	2.6416	GTAAGATCAG	AGTTCTTAAG	0	0	0	0	polyA
chrXVI:729352:729481:-	0	1	0	-	2.72472	GTATGTACAG	TCCTATGTAG	2	1	2	1	polyA
chrVII:62130:62196:+	1	0	0	+	3.86218	GTATGTCTGT	TAGTTTAAAG	1	2	0	1	polyA
chrIV:307015:307765:-	0	1	0	-	2.62352	GTATGTTAAA	CTTACGACAG	0	1	0	1	polyA
chrIV:1406991:1407231:+	0	0	0	+	2.15564	GTATGTTACG	ACTCACTTAG	0	0	0	0	polyA
chrX:649513:649657:-	0	0	0	-	2.23593	GTAAGTTATG	ATACAAAAAG	0	0	0	0	polyA
chrXII:982457:982538:-	0	0	0	-	2.77736	GTATGTATGA	GTTTGAGTAG	0	0	0	0	polyA
chrXVI:673747:674376:+	0	0	0	+	2.4997	GTATGTCTGA	TGAACAAAAG	0	0	0	0	polyA
chrXII:856568:857057:+	0	1	0	+	3.18083	GCATGGTATG	CCTTATTTAG	2	1	2	1	polyA
chrXV:867396:867586:+	0	1	0	+	3.88261	GTATGAAATA	TTTTATACAG	2	1	2	1	polyA
chrVI:223439:223727:-	1	0	0	-	3.0503	GCAGGTAGCC	TCTTCTCCAG	1	3	0	0	polyA
chrVI:64352:64920:-	0	1	0	-	3.28284	GTACGTTAAT	TTTGAAGAAG	2	1	2	1	polyA
chrII:604513:604930:+	1	0	0	+	2.54952	GTACGTATTA	TTTTTAGGAG	1	0	0	1	polyA
chrVII:439096:439323:+	0	1	0	+	4.16212	GTATAACATG	ATTTCAACAG	2	1	2	1	polyA
chrVII:439098:439313:+	0	0	0	+	3.79571	ATAACATGAT	TATCGTTTAC	2	2	2	1	polyA
chrXIV:62360:62923:-	0	1	0	-	3.5901	GTACGTATAA	GACGTTGCAG	2	1	2	1	polyA
chrXV:505936:505995:+	1	0	0	+	3.34045	GTATGTTATT	AGGAAAAAAG	1	2	0	1	polyA
chrII:170619:170804:+	0	1	0	+	4.07385	GTATGCTTTT	TTCCACTCAG	0	1	0	1	polyA
chrVIII:505242:505516:-	0	1	0	-	3.08142	GTATGTTGAT	ATATAGAAAG	2	1	2	1	polyA
chrII:342697:342789:+	0	0	0	+	3.63041	GTGTGTTAGT	TATAATCAAG	0	0	0	0	polyA
chrXIV:272386:273601:-	0	0	0	-	2.28259	GTTTGTGTAC	ATTTCGACAG	0	0	0	0	polyA
chrII:170675:170757:+	1	0	0	+	3.87325	GTATGTTCAT	TTGAAAAAAG	1	2	0	1	polyA
chrXIV:728553:728921:+	0	0	0	+	3.35021	GTAAGTATTT	GCCAGCACAG	0	0	0	0	polyA
chrXIII:559781:560157:+	0	0	0	+	5.141	GTATGTCTGT	ATTTTTGAAG	0	0	0	0	polyA
chrII:565749:566935:+	0	0	0	+	2.25163	ATGGATTTTT	CTGTACGGAC	0	0	0	0	polyA
chrXII:898547:898645:+	0	1	0	+	3.50869	GTATAAAAAA	ATTATTGCAG	2	1	2	0	polyA
chrVII:439380:439479:+	0	0	0	+	4.35239	GTAAGTACAC	TTTGAGAAAG	2	2	2	1	polyA
chrXII:457115:466254:-	0	0	0	-	2.92193	GTTAAAAAGC	GTTGTTGCAG	0	0	0	0	polyA
chrIV:340809:341183:-	1	0	0	-	3.81587	GTATGCAGAA	TTGGTTATAG	1	0	0	0	polyA
chrII:60207:60697:-	0	1	0	-	2.64644	GTATGTTAAA	CGATATTGAG	3	1	3	1	polyA
chrXI:109576:109890:+	1	0	0	+	2.82258	GTATGTCAAG	CAGGCTAAAG	1	2	0	1	polyA
chrXV:423656:423734:-	0	0	0	-	2.84535	GTATGGTACC	TGTCGTACAG	0	0	0	0	polyA
chrIX:317016:317171:+	0	1	0	+	4.39047	GTATGAGAAT	ATTTAAACAG	2	1	2	1	polyA
chrV:362911:363092:+	0	1	0	+	2.37095	GTACTGCAAT	ATTAAAATAG	3	1	3	0	polyA
chrXIII:551950:552510:+	1	0	0	+	2.15564	GTATGTTTTC	TGGTAAGAAG	1	0	0	1	polyA
chrIII:101604:101700:-	0	1	0	-	2.58689	GTATGTATAT	TGCGTTCAAG	3	1	3	1	polyA
chrII:168553:168808:+	0	1	0	+	3.45282	GTTGGTAGCA	TTTTTCACAG	3	1	3	1	polyA
chrXI:93365:93465:-	0	1	0	-	5.05755	GTACGTATAA	GTTTTTATAG	2	1	2	0	polyA
chrIV:216156:216521:+	1	0	0	+	3.08496	GTATGTAACG	GATTTCATAG	1	0	0	0	polyA
chrXII:855876:856427:+	1	0	0	+	4.37263	GTATGTGGAC	CAAAACATAG	1	0	0	0	polyA
chrXI:437836:437913:+	1	0	0	+	2.98523	GTATGTTGTT	AGAATCAAAG	1	2	0	1	polyA
chrXVI:795028:795377:+	1	0	0	+	2.66123	GTATGTACAA	TTGTCAAAAG	1	2	0	1	polyA
chrXIV:494523:494632:-	1	0	0	-	2.12193	GTAATGGTAA	TTTATTATAG	1	0	0	1	polyA
chrIV:491687:491898:+	0	1	0	+	4.33402	GCATGTTTAT	CTTTTTTTAG	2	1	2	1	polyA
chrXV:778858:779252:-	1	0	0	-	4.31043	GTATGAATAT	ATTTTGATAG	1	3	0	1	polyA
chrX:469182:469405:-	1	0	0	-	3.1037	GCAGGTAAAC	TGTAGTATAG	1	2	2	1	polyA
chrVIII:148115:148508:-	1	0	0	-	4.0217	GTATGCGTTT	TTCATTACAG	1	2	0	1	polyA
chrVIII:103616:103856:-	0	0	0	-	3.10869	GTAAGGTGAG	GTAACTTGAG	0	0	0	0	polyA
chrVII:383484:383580:+	0	0	0	+	3.30875	GTATGTATGA	ATGGTAGTAG	0	0	0	0	polyA
chrXVI:795133:795394:+	0	1	0	+	3.90241	GTAAGGGAGA	TTTAAAACAG	2	1	2	1	polyA
chrXV:349496:349598:-	0	0	0	-	2.72548	GTATGTTTTT	TTACTTTTAG	0	0	0	0	polyA
chrXIV:144846:145254:-	0	1	0	-	3.20285	GTATGTTTAT	AAGCTATCAG	2	1	2	1	polyA
chrXII:242320:242775:+	1	0	0	+	3.32782	GTATGTACAC	TGGCTGCTAG	1	0	0	1	polyA
chrXI:625900:625986:+	1	0	0	+	3.17512	GTAAGTAGAA	AGAACTAAAG	1	2	0	1	polyA
chrVII:62130:62183:+	1	0	0	+	3.91462	GTATGTCTGT	CGATCAAAAG	1	2	0	1	polyA
chrVII:920663:921129:+	1	0	0	+	2.64644	GTATGTTATA	GTTCACCAAG	1	2	0	1	polyA
chrXII:522889:523028:+	0	1	0	+	3.42162	GTATGCCTGA	TTTTAAATAG	3	1	3	1	polyA
chrVII:365525:365969:-	1	0	0	-	2.82218	GTCTATTTTA	ATTATTACAG	1	2	0	1	polyA
chrXIV:62369:62923:-	0	1	0	-	2.4956	GTACGTATAA	TCAATTAGAG	0	1	0	1	polyA
chrIV:122076:122167:+	1	0	0	+	2.11328	GTATGTTGAA	AACAACTAAG	1	0	0	0	polyA
chrIV:306804:307765:-	0	1	0	-	3.76001	GTATGTTAAA	GTTAATTTAG	0	1	0	1	polyA
chrXVI:303560:303624:+	0	0	0	+	2	ATTGGTTTGC	TGCTTCTGAC	0	0	0	0	polyA
chrXV:505936:506252:+	1	0	0	+	2.33957	GTATGTTATT	CATTTACAAG	1	0	0	1	polyA
chrIV:655202:655272:+	0	0	0	+	3.05656	GTATGCTTCC	TGATAATCAG	0	0	0	0	polyA
chrXII:987140:987349:+	1	0	0	+	3.45141	GTATGTAAAG	AATGGCATAG	1	2	0	1	polyA
chrIV:122076:122194:+	1	0	0	+	2	GTATGTTGAA	AGTATATAAG	1	0	0	0	polyA
chrXVI:243488:244025:-	0	0	0	-	3.55119	GTATGTTTCT	TACTTAGAAG	0	0	0	0	polyA
chrII:168599:168808:+	0	1	0	+	2.68872	GTACGAATTG	TTTTTCACAG	0	1	0	1	polyA
chrXV:373898:374122:+	0	0	0	+	2.48171	GTAAGCATTC	ATCCTATAAG	0	0	0	0	polyA
chrXIII:666921:667017:-	0	1	0	-	2.03876	GTATGTGTGA	AGGCTAACAG	2	1	2	1	polyA
chrXII:453363:462502:-	0	0	0	-	2	GTTTTCATGC	GAAGGAATAG	0	0	0	0	riboZero
chrX:50320:50411:-	0	1	0	-	3.83496	GTATGTTCAT	TGTTTCGAAG	2	1	2	1	riboZero
chrXII:593144:599068:+	0	0	0	+	2.11751	GTTGGAATAG	CTCAGAATAG	0	0	0	0	riboZero
chrXI:447150:447242:-	0	0	0	-	2.52164	GTATGCCAGC	ATAAATAAAG	0	3	0	1	riboZero
chrXIV:282743:282804:-	0	0	0	-	4.04267	GTCTTGTTGA	GGATTTGGAG	0	0	0	0	riboZero
chrXII:453697:462836:-	0	0	0	-	2.25163	GTGGGGAAAG	AAGACTGAAG	0	0	0	0	riboZero
chrIV:122076:122201:+	1	0	0	+	2.40564	GTATGTTGAA	AAGGAGTTAG	1	0	0	0	riboZero
chrII:592415:592689:-	1	0	0	-	2.45083	GTATACCCAC	TTTATAACAG	1	0	0	1	riboZero
chrVII:937211:937320:+	0	0	0	+	3.10689	GTAAGATTTC	TGTGATAAAG	0	0	0	0	riboZero
chrXV:29674:30635:+	0	0	0	+	2.51197	GTGGAACCGG	AGAAAGAGAG	0	0	0	0	riboZero
chrIV:1329745:1329815:+	0	0	0	+	2.45083	GTGGTTACGG	GGCTCCAGAG	0	0	0	0	riboZero
chrXV:296674:297192:+	0	0	0	+	2.32193	GTAAGTATCA	CAAAAATTAG	0	0	0	0	riboZero
chrX:50318:50411:-	0	1	0	-	3.43994	GTATGTTCAT	TTTCGAAGAG	0	1	2	1	riboZero
chrX:400191:400255:+	0	0	0	+	3.99173	GTGCTGAAGA	AGTGCTGGAG	0	0	0	0	riboZero
chrI:128513:129021:-	0	0	0	-	2	GTATGGATGT	CAGTTGTTAG	0	0	0	0	riboZero
chrVII:62130:62214:+	1	0	0	+	2.64644	GTATGTCTGT	GGATTCTTAG	1	0	0	1	riboZero
chrX:503769:503981:+	0	0	0	+	4.13144	GTAAGTTGAG	AACATTATAG	0	0	0	0	riboZero
chrXV:31111:31214:+	0	0	0	+	3.12193	GTTGAACCGG	AGTGGCGGAG	0	0	0	0	riboZero
chrXI:220776:220831:+	0	0	0	+	4.38652	GTGCTGGAGG	ATGATGGGAG	0	0	0	0	riboZero
chrIV:1329769:1329872:+	0	0	0	+	3.6645	GTGGCTACGG	TATTCCAGAG	0	0	0	0	riboZero
chrXII:789112:789218:-	0	0	0	-	4.14863	GTTTGTTGGA	TCCTCCACAG	0	0	0	0	riboZero
chrXIII:610806:611036:+	0	0	0	+	4.1788	GTATGTAAAA	GATGAATAAG	0	0	0	0	riboZero
chrIV:122076:122186:+	1	0	0	+	3.27291	GTATGTTGAA	TCTCTTCAAG	1	0	0	0	riboZero
chrXII:458101:467240:+	0	0	0	+	3.73632	GTTTGAATTC	TTCCCCCAAG	0	0	0	0	riboZero
chrX:400245:400309:+	0	0	0	+	2.63584	GTGCTGGAGG	GGTACTGGAG	0	0	0	0	riboZero
chrI:12486:12775:+	0	0	0	+	4.14908	GTGGTAATGA	CTGGTAACAG	0	0	0	0	riboZero
chrXVI:656504:656575:-	0	0	0	-	2.25	GTAGTTGAGT	CGGAGGACAG	0	0	0	0	riboZero
chrXII:564435:564513:-	0	1	0	-	3.71851	GTAAGTTTTT	TATTATTGAG	0	1	0	1	riboZero
chrXVI:29539:29658:+	0	0	0	+	2	GTATGAAATA	ATTTATCCAG	0	0	0	0	riboZero
chrXI:155412:155654:+	0	1	0	+	4.32015	GTGAGTTCTC	AAATGACCAG	0	1	0	1	riboZero
chrXII:452056:461195:-	0	0	0	-	2.25163	GTCAGAATCC	CGCCTCTAAG	0	0	0	0	riboZero
chrIV:601072:601139:-	0	0	0	-	3.19716	GTACCGTTAG	TTCAGTAGAG	0	0	0	0	riboZero
chrXII:789133:789197:-	0	0	0	-	4.05252	GTTTGTTGGA	TCCTTCACAG	0	0	0	0	riboZero
chrXI:155412:155636:+	0	0	0	+	4.58644	GTGAGTTCTC	AAGTACGAAG	0	2	0	1	riboZero
chrIX:23755:23864:-	0	0	0	-	2.66596	GTTCCAAAGA	ACCTCTGAAG	0	0	0	0	riboZero
chrIV:169349:169601:+	0	0	0	+	3.02206	GTAAGTTGAA	GCTTCTTTAG	0	0	0	0	riboZero
chrXIV:282623:282759:-	0	0	0	-	2.72548	GTCTTGGATT	AGACTTGGAG	0	0	0	0	riboZero
chrVII:946323:946420:+	0	1	0	+	3.18201	GTGGTACGTT	TTTTCTACAG	0	1	0	1	riboZero
chrV:369419:369488:-	0	0	0	-	2	GTATTTTTTT	TTAATAAAAG	0	0	0	0	riboZero
chrXVI:582557:583088:-	1	0	0	-	2.23593	GTATGTGATT	AAAAAACTAG	1	0	0	1	riboZero
chrX:570566:570640:-	0	0	0	-	2	GTAGTCCTTC	CATTTCCAAG	0	0	0	0	riboZero
chrIV:427465:427574:+	0	0	0	+	2	GTGGCTTCGG	GGCTCCAGAG	0	0	0	0	riboZero
chrXIV:282623:282684:-	0	0	0	-	3.82994	GTCTTGTTGA	AGACTTGGAG	0	0	0	0	riboZero
chrXIV:427102:427192:+	0	0	0	+	2.68872	GTATGACACA	ACTGTCTCAG	0	0	0	0	riboZero
chrIV:601362:601517:-	0	0	0	-	2.58496	GTCTTACCGT	ACGGTGTAAG	0	0	0	0	riboZero
chrX:637808:638041:+	1	0	0	+	3.02699	GTATGTATAT	TATGCGCAAG	1	0	0	1	riboZero
chrVII:682947:683065:-	0	0	0	-	2	GTATGTTCCA	GTTTATATAG	0	0	0	0	riboZero
chrXVI:445501:445576:-	0	0	0	-	3.41175	GTGTGTTCAT	AGCTTCGCAG	0	0	0	0	riboZero
chrXII:987140:987221:+	1	0	0	+	2.12809	GTATGTAAAG	GGTCTCTAAG	1	2	2	1	riboZero
chrXII:456443:465582:-	0	0	0	-	2.84644	GTTGGTGGAG	CCGTTCTTAG	0	0	0	0	riboZero
chrVII:937211:937335:+	0	0	0	+	3.26083	GTAAGATTTC	GATGTTGTAG	0	0	0	0	riboZero
chrXII:454262:463401:+	0	0	0	+	2.58496	GTCTTTCGCC	GTTCGATTAG	0	0	0	0	riboZero
chrXIV:283722:283808:+	0	0	0	+	3.69595	GTATCTTCGT	CAAGTAGTAG	0	0	0	0	riboZero
chrII:170619:170757:+	0	0	0	+	2.64644	GTATGCTTTT	TTGAAAAAAG	0	2	0	1	riboZero
chrVII:946319:946420:+	0	1	0	+	3.60566	GTCTGTGGTA	TTTTCTACAG	0	1	0	1	riboZero
chrXII:452964:462103:-	0	0	0	-	2.52164	GTGAAGAAAT	AATGTCAAAG	0	0	0	0	riboZero
chrII:60148:60697:-	0	1	0	-	2.75	GTATGTTAAA	CTGACAACAG	2	1	2	1	riboZero
chrXVI:697962:698314:-	0	0	0	-	2	GTAAGTATAA	TTTCTGACAG	0	0	0	0	riboZero
chrIV:451410:451490:-	0	0	0	-	3.59436	GTATGGTGGA	ATCTATGTAG	0	0	0	0	riboZero
chrXII:458296:467435:-	0	0	0	-	2.25163	GTCTCTATAC	ATCTGCCTAG	0	0	0	0	riboZero
chrXII:787693:788228:+	0	0	0	+	2.58496	GTAAGTTGGA	GAAATTTCAG	0	0	0	0	riboZero
chrVI:109957:110032:-	0	0	0	-	2.28104	GTAAGTAAAG	AAATCGAAAG	0	0	0	0	riboZero
chrIV:601030:601139:-	0	0	0	-	3.29503	GTACCGTTAG	TTCAGTAGAG	0	0	0	0	riboZero
chrIX:23442:23764:+	0	0	0	+	4.14523	GTGACAGTCT	AGCTTCAGAG	0	0	0	0	riboZero
chrV:468240:468387:+	0	0	0	+	2.75	GTAAGTATAT	TAACGCTAAG	0	0	0	0	riboZero
chrXIV:282623:282744:-	0	0	0	-	3.38327	GTCTTGTTGA	AGACTTGGAG	0	0	0	0	riboZero
chrII:115473:115569:+	0	0	0	+	2.25163	GTATGTATAT	GCACCAATAG	0	0	0	0	riboZero
chrXII:244384:245149:-	0	0	0	-	3.03915	GTACGTACCA	TTGTATCTAG	0	0	0	0	riboZero
chrV:348200:348286:-	1	0	0	-	2.52164	GTACGAAAAT	CTGAAAGCAG	1	0	0	1	riboZero
chrXIV:283722:283805:+	0	0	0	+	3.78347	GTATCTTCGT	TATCAAGTAG	0	0	0	0	riboZero
chrVIII:526102:526206:-	0	0	0	-	3.57662	GTATGTATTG	GTACCATCAG	0	0	0	0	riboZero
chrVI:109947:110032:-	0	0	0	-	2.9183	GTAAGTAAAG	CTAAATAAAG	0	0	0	0	riboZero
chrIX:47701:47764:+	0	0	0	+	3.48503	GTACCCAAAT	GGTTAGGTAG	0	3	0	1	riboZero
chrIX:390678:390811:+	0	0	0	+	2.70928	GTAGTTTCAC	GCATCCAGAG	0	0	0	0	riboZero
chrIV:1329745:1329836:+	0	0	0	+	2.79479	GTGGTTACGG	AGTCCTAGAG	0	0	0	0	riboZero
chrXII:457962:467101:+	0	0	0	+	2.32193	GTTTCCTCTA	ACTCTTTGAG	0	0	0	0	riboZero
chrIV:60477:61787:-	0	0	0	-	4.98357	GTTCGTTAAT	GTAACTGTAG	0	0	0	0	riboZero
chrIV:1329724:1329815:+	0	0	0	+	2.58496	GTGGATTTGG	GGCTCCAGAG	0	0	0	0	riboZero
