# Supplementary material
Source: HighWire-hosted journal article supplement (doi:10.1101/rna.057216.116)
Supplement: Supplemental_TableS7.xlsx [file Supplemental_TableS7.xlsx]

## Sheet: table_x1_y0_n20_ciRange0.5.filt
Table S7. Figure 6A PSI values
Intron coordinates	exp1	exp3	alpha1	alpha2	sorbitol1	sorbitol2	exp2	salt1	salt2	DNA1	DNA2	ox1	ox2	heat1	heat2	stationary1	stationary2	sc1	sc2	gylcerol1	gylcerol2	calcium1	calcium2	lowN1	lowN2	lowPhos1	lowPhos2	calcofluor1	calcofluor2	urea1	urea2	juice1	juice2	benomyl1	benomyl2	cRed1	cRed2
chrI:142053:142253:+@chrI:142620:142820:+	0.04	0.03	0.01	0.03	0.02	0.03	0.05	0.04	0.04	0.03	0.03	0.01	0.01	0.03	0.03	0.15	0.15	0.03	0.03	0.04	0.03	0.03	0.02	0.05	0.03	0.02	0.03	0.04	0.05	0.02	0.02	0.04	0.04	0.03	0.03	0.03	0.02
chrI:87187:87387:+@chrI:87501:87701:+	0.14	0.05	0.03	0.06	0.08	0.11	0.06	0.19	0.14	0.13	0.04	0.08	0.09	0.09	0.1	0.48	0.44	0.13	0.08	0.08	0.09	0.16	0.05	0.11	0.11	0.14	0.07	0.05	0.04	0.1	0.07	0.07	0.04	0.1	0.08	0.18	0.08
chrII:124954:125154:+@chrII:125271:125471:+	0.31	0.25	-1	0.42	0.35	0.42	0.29	0.42	0.39	0.33	0.28	0.41	-1	0.34	0.43	0.94	0.93	0.43	0.44	0.31	0.46	0.42	0.42	0.66	0.37	0.33	0.38	0.5	0.43	0.54	0.41	0.47	0.58	0.64	-1	0.48	0.49
chrII:186428:186628:-@chrII:186152:186352:-	0.47	0.39	-1	-1	-1	-1	-1	-1	-1	-1	-1	-1	-1	-1	-1	0.91	0.93	-1	-1	-1	-1	-1	-1	-1	-1	-1	-1	-1	-1	-1	-1	-1	-1	-1	-1	-1	-1
chrII:332675:332875:+@chrII:333387:333587:+	0.14	0.21	0.14	0.11	0.2	0.14	0.15	0.26	0.26	0.12	0.14	0.11	0.07	0.17	0.18	0.39	0.35	0.14	0.15	0.2	0.23	0.13	0.16	0.18	0.22	0.17	0.15	0.2	0.18	0.1	0.09	0.09	0.08	0.17	0.16	0.11	0.14
chrII:342498:342698:+@chrII:342790:342990:+	-1	-1	0.85	-1	-1	-1	0.9	-1	-1	-1	-1	NA	NA	-1	-1	-1	-1	-1	-1	-1	-1	-1	-1	-1	-1	-1	-1	NA	NA	-1	-1	-1	-1	-1	NA	-1	NA
chrII:407123:407323:-@chrII:406827:407027:-	0.14	0.11	0.09	0.13	0.15	0.1	0.12	0.09	0.08	0.1	0.09	0.11	0.08	0.13	0.11	0.63	0.64	0.18	0.15	0.14	0.11	0.1	0.1	0.11	0.16	0.13	0.12	0.15	0.17	0.08	0.1	0.12	0.14	0.15	0.08	0.13	0.13
chrII:415260:415460:-@chrII:414553:414753:-	0.06	0.07	0.03	0.04	0.06	0.05	0.06	0.11	0.12	0.05	0.05	0.02	0.02	0.07	0.08	0.29	0.23	0.03	0.03	0.05	0.05	0.05	0.03	0.08	0.07	0.05	0.05	0.05	0.07	0.03	0.04	0.05	0.04	0.07	0.07	0.05	0.05
chrII:45444:45644:+@chrII:45978:46178:+	0.06	0.09	0.05	0.05	0.07	0.06	0.06	0.08	0.11	0.05	0.05	0.04	0.05	0.08	0.07	0.6	0.56	0.04	0.04	0.04	0.04	0.03	0.03	0.06	0.06	0.04	0.04	0.04	0.06	0.03	0.03	0.05	0.05	0.04	0.04	0.04	0.04
chrII:462009:462209:+@chrII:462290:462490:+	0.95	0.95	0.95	0.95	0.97	0.92	0.95	-1	-1	-1	0.9	0.93	-1	0.95	0.94	0.99	0.93	0.93	0.93	-1	-1	0.91	-1	-1	-1	0.93	0.92	-1	0.92	-1	0.91	0.94	0.93	-1	-1	0.92	-1
chrII:462229:462429:+@chrII:462500:462700:+	-1	-1	-1	-1	-1	-1	-1	-1	-1	-1	-1	-1	-1	-1	-1	0.56	0.47	-1	-1	-1	-1	-1	-1	-1	-1	-1	-1	-1	-1	-1	-1	-1	-1	-1	-1	-1	-1
chrII:47147:47347:-@chrII:46858:47058:-	0.93	0.91	-1	0.78	0.57	0.63	0.74	0.82	0.84	0.87	-1	-1	-1	-1	-1	0.93	0.95	-1	-1	-1	-1	-1	-1	-1	-1	-1	0.89	-1	-1	-1	-1	-1	0.42	-1	-1	-1	-1
chrII:479145:479345:+@chrII:479435:479635:+	-1	-1	-1	-1	-1	-1	-1	-1	-1	-1	-1	-1	-1	-1	-1	-1	-1	-1	-1	-1	-1	-1	-1	-1	-1	-1	-1	-1	-1	-1	-1	-1	-1	-1	-1	-1	-1
chrII:592769:592969:-@chrII:592216:592416:-	0.03	0.04	0.02	0.02	0.04	0.03	0.03	0.05	0.05	0.02	0.03	0.02	0.02	0.07	0.06	0.36	0.37	0.02	0.02	0.04	0.04	0.03	0.03	0.04	0.05	0.03	0.03	0.06	0.07	0.02	0.02	0.03	0.02	0.04	0.03	0.03	0.03
chrII:606080:606280:+@chrII:606669:606869:+	0.04	0.05	0.02	0.03	0.05	0.04	0.05	0.11	0.09	0.03	0.03	0.02	0.01	0.06	0.05	0.41	0.35	0.03	0.03	0.05	0.06	0.04	0.03	0.05	0.05	0.04	0.05	0.07	0.07	0.03	0.03	0.02	0.02	0.05	0.04	0.03	0.03
chrII:680040:680240:-@chrII:679742:679942:-	0.1	0.11	0.14	0.08	0.13	0.11	0.14	0.14	0.16	0.08	-1	-1	-1	0.1	0.07	0.32	0.32	-1	0.17	-1	-1	-1	-1	0.1	0.08	-1	-1	-1	-1	-1	-1	0.18	0.14	-1	-1	-1	-1
chrII:89441:89641:-@chrII:88932:89132:-	0.01	0.02	0.01	0.01	0.02	0.02	0.01	0.02	0.02	0.01	0.02	0.01	0.01	0.04	0.04	0.17	0.14	0.02	0.01	0.02	0.02	0.02	0.02	0.02	0.01	0.01	0.02	0.02	0.02	0.01	0.01	0.03	0.02	0.02	0.02	0.02	0.02
chrIII:111634:111834:-@chrIII:111357:111557:-	0.96	0.94	0.96	0.92	0.97	0.93	0.97	0.92	-1	0.93	0.94	0.91	-1	0.88	0.94	0.94	0.92	-1	0.85	0.95	0.96	0.92	0.89	-1	-1	0.94	0.95	0.9	0.94	0.9	0.92	0.86	0.82	0.92	0.93	0.89	0.94
chrIII:178214:178414:-@chrIII:177706:177906:-	0.01	0.01	0	0.01	0.01	0.01	0.01	0.02	0.02	-1	-1	-1	0.01	0.02	0.02	0.15	0.13	-1	-1	0.01	0.01	-1	-1	-1	-1	-1	-1	-1	0.01	-1	0.01	-1	-1	0.01	-1	0.01	0.01
chrIV:1103609:1103809:+@chrIV:1103893:1104093:+	-1	-1	-1	-1	-1	0.89	-1	-1	-1	-1	-1	-1	-1	-1	-1	-1	-1	-1	-1	-1	-1	-1	-1	-1	-1	-1	-1	-1	-1	-1	-1	-1	-1	-1	-1	-1	-1
chrIV:117466:117666:+@chrIV:118158:118358:+	0.01	0.01	0	0.01	0.01	0.01	0.01	0.01	0.02	0.01	0.01	0	0	0.02	0.02	0.2	0.17	0.01	0.01	0.01	0.01	0.01	0.01	0.01	0.01	-1	0.01	0.01	0.01	0.01	0.01	0	0.01	0.01	0.01	0.01	0.01
chrIV:1212677:1212877:+@chrIV:1212979:1213179:+	-1	-1	-1	-1	-1	-1	-1	0.83	0.76	-1	-1	-1	-1	-1	-1	-1	-1	-1	-1	-1	-1	-1	-1	-1	-1	-1	-1	-1	-1	-1	-1	-1	-1	-1	-1	-1	-1
chrIV:1236642:1236842:+@chrIV:1237609:1237809:+	0.16	0.17	0.15	0.18	0.2	0.13	0.16	0.28	0.2	0.14	0.12	0.03	0.02	0.14	0.12	0.37	0.47	0.18	0.14	0.17	0.15	0.1	0.09	0.1	0.09	0.24	0.22	0.23	0.25	0.18	0.18	0.15	0.14	0.26	0.27	0.21	0.22
chrIV:1266862:1267062:-@chrIV:1266569:1266769:-	0.79	0.92	0.75	0.48	0.79	0.67	0.88	0.63	-1	0.66	0.87	-1	-1	0.64	0.62	0.9	0.94	-1	0.79	0.9	0.84	0.77	0.81	0.56	0.55	0.65	-1	0.81	0.93	-1	0.52	0.64	0.62	0.93	0.85	0.79	0.77
chrIV:1319698:1319898:-@chrIV:1319417:1319617:-	0.08	0.07	-1	-1	-1	-1	0.15	-1	-1	-1	-1	-1	-1	-1	-1	-1	-1	-1	-1	-1	-1	-1	-1	-1	-1	-1	-1	-1	-1	-1	-1	-1	-1	-1	-1	-1	-1
chrIV:1319817:1320017:-@chrIV:1319520:1319720:-	-1	-1	-1	-1	-1	-1	-1	-1	-1	-1	-1	-1	-1	-1	-1	-1	-1	-1	-1	-1	-1	-1	-1	-1	-1	-1	-1	-1	-1	-1	-1	-1	-1	-1	-1	-1	-1
chrIV:1355551:1355751:-@chrIV:1355036:1355236:-	0.06	0.11	0.04	0.03	0.09	0.09	0.07	0.14	0.14	0.09	0.1	0.04	0.05	0.14	0.15	0.76	0.84	0.04	0.05	0.1	0.09	0.09	0.11	0.12	0.12	0.09	0.08	0.13	0.12	0.08	0.05	0.07	0.04	0.13	0.12	0.1	0.1
chrIV:1406792:1406992:+@chrIV:1407232:1407432:+	0.92	0.95	0.86	0.87	0.91	0.91	0.92	-1	-1	-1	-1	-1	NA	-1	0.89	-1	-1	-1	0.88	-1	0.89	-1	-1	-1	-1	-1	0.9	-1	-1	-1	-1	-1	0.89	0.88	-1	-1	-1
chrIV:1450847:1451047:-@chrIV:1450257:1450457:-	0.05	0.07	0.04	0.04	0.08	0.07	0.06	0.1	0.09	0.05	0.06	0.03	0.02	0.13	0.11	0.46	0.4	0.06	0.08	0.08	0.08	0.08	0.06	0.11	0.12	0.08	0.08	0.1	0.08	0.06	0.07	0.05	0.03	0.07	0.07	0.06	0.07
chrIV:217402:217602:+@chrIV:218008:218208:+	0.02	0.03	0.01	0.01	0.02	0.02	0.02	0.06	0.04	0.01	0.02	0.01	0.01	0.03	0.03	0.27	0.24	0.01	0.01	0.02	0.01	0.01	0.01	0.04	0.02	0.01	0.01	0.02	0.02	0.02	0.01	0.02	0.02	0.02	0.02	0.01	0.02
chrIV:229819:230019:+@chrIV:230321:230521:+	0.08	0.09	0.05	0.08	0.05	0.07	0.08	0.06	0.07	0.06	0.04	0.04	0.04	0.08	0.07	0.14	0.14	0.05	0.05	0.06	0.06	0.05	0.05	0.08	0.08	0.05	0.05	0.07	0.08	0.04	0.06	0.05	0.06	0.07	0.05	0.05	0.06
chrIV:255045:255245:-@chrIV:254774:254974:-	0.93	0.95	0.92	0.91	0.93	0.9	0.94	0.89	0.88	-1	-1	0.91	-1	-1	0.73	0.96	0.95	-1	0.94	0.9	0.92	0.77	-1	-1	-1	0.89	0.89	-1	0.92	-1	0.91	-1	0.57	0.91	-1	0.88	-1
chrIV:267525:267725:+@chrIV:267807:268007:+	-1	-1	-1	-1	-1	-1	-1	-1	-1	-1	-1	-1	-1	-1	-1	-1	-1	-1	-1	-1	-1	-1	-1	-1	-1	-1	-1	-1	-1	-1	-1	-1	-1	-1	-1	-1	-1
chrIV:308227:308427:+@chrIV:308793:308993:+	0.03	0.02	0.01	0.01	0.02	0.01	0.03	0.06	0.04	-1	0.02	0.01	0.01	0.04	0.04	0.42	0.52	-1	0.01	0.03	0.03	0.02	0.02	0.06	0.05	-1	-1	0.04	0.04	0.02	0.01	-1	0.02	0.03	0.02	0.03	0.02
chrIV:314337:314537:-@chrIV:313844:314044:-	-1	-1	-1	-1	-1	-1	-1	-1	-1	-1	-1	-1	NA	-1	-1	0.95	0.91	-1	-1	-1	-1	-1	NA	-1	-1	-1	-1	NA	-1	NA	-1	NA	NA	-1	NA	-1	-1
chrIV:322082:322282:+@chrIV:322704:322904:+	0.01	0.01	0.01	0.01	0.01	0.01	0.01	0.02	0.02	0.01	0.01	0.01	0.01	0.02	0.02	0.28	0.26	0.01	0.01	0.01	0.01	0.01	0.01	0.02	0.02	0.01	0.01	0.01	0.01	0.01	0.01	0.01	0.01	0.01	0.01	0.01	0.01
chrIV:337324:337524:+@chrIV:337635:337835:+	-1	0.31	-1	-1	-1	-1	0.26	-1	-1	-1	-1	-1	-1	-1	-1	0.91	0.94	-1	-1	-1	-1	-1	-1	-1	-1	-1	-1	-1	-1	-1	-1	-1	-1	-1	-1	-1	-1
chrIV:417627:417827:-@chrIV:417021:417221:-	0.21	-1	-1	0.42	0.29	-1	0.21	0.17	0.19	-1	-1	0.18	-1	-1	-1	0.45	-1	-1	-1	-1	-1	-1	-1	-1	-1	-1	-1	-1	-1	-1	-1	-1	-1	-1	-1	-1	-1
chrIV:431473:431673:-@chrIV:431186:431386:-	0.3	0.29	0.23	0.19	0.2	0.2	0.24	0.48	0.3	0.23	0.28	0.19	0.09	0.26	0.28	0.63	0.75	0.15	0.15	0.34	0.33	0.36	0.24	0.24	0.13	0.29	0.38	0.23	0.39	0.2	0.26	0.14	0.16	0.25	0.33	0.29	0.27
chrIV:458098:458298:-@chrIV:457817:458017:-	0.93	0.94	0.93	-1	0.92	0.88	0.92	-1	-1	-1	-1	-1	-1	-1	-1	-1	0.83	-1	0.86	-1	-1	-1	-1	-1	-1	-1	-1	-1	-1	-1	-1	-1	0.83	-1	-1	-1	-1
chrIV:491359:491559:+@chrIV:491899:492099:+	0.07	0.08	0.05	0.05	0.07	0.05	0.06	0.12	0.1	0.05	0.05	0.04	0.03	0.09	0.1	0.77	0.7	0.05	0.06	0.07	0.08	0.06	0.06	0.11	0.09	0.05	0.07	0.08	0.09	0.03	0.05	0.04	0.05	0.07	0.06	0.05	0.06
chrIV:569724:569924:-@chrIV:569433:569633:-	-1	-1	-1	-1	-1	-1	-1	-1	-1	-1	-1	-1	-1	-1	-1	0.32	0.4	-1	-1	-1	-1	-1	-1	-1	-1	-1	-1	-1	-1	-1	-1	-1	-1	-1	-1	-1	-1
chrIV:579278:579478:+@chrIV:580018:580218:+	0.42	0.52	0.24	0.26	0.56	0.49	0.43	0.6	0.87	0.37	0.39	0.19	0.11	0.31	0.28	0.32	0.27	0.26	0.34	0.51	0.52	0.44	0.46	0.59	0.62	0.35	0.33	0.59	0.56	0.34	0.28	0.52	0.35	0.48	0.42	0.28	0.36
chrIV:65106:65306:+@chrIV:65378:65578:+	-1	-1	-1	-1	-1	-1	-1	-1	-1	-1	-1	-1	-1	-1	-1	-1	-1	-1	-1	-1	-1	-1	-1	-1	-1	-1	-1	-1	-1	-1	-1	-1	-1	-1	-1	-1	-1
chrIV:655003:655203:+@chrIV:655273:655473:+	0.97	0.99	0.99	0.99	0.99	0.98	0.99	0.94	0.96	0.99	0.97	0.98	0.97	0.98	0.98	0.95	0.92	0.97	0.98	0.97	0.96	0.96	0.93	0.97	0.95	0.96	0.97	0.95	0.95	0.96	0.97	0.96	0.99	0.95	0.95	0.97	0.95
chrIX:127461:127661:+@chrIX:128149:128349:+	0.04	0.02	-1	0.04	0.02	0.03	0.03	-1	-1	0.05	0.03	0.04	-1	0.05	0.07	0.28	0.24	0.03	0.02	0.03	0.02	-1	-1	0.04	-1	0.02	0.03	0.03	0.02	-1	0.02	0.04	0.05	0.03	0.03	0.04	0.03
chrIX:166234:166434:+@chrIX:166520:166720:+	-1	-1	-1	-1	-1	-1	-1	-1	-1	-1	-1	-1	-1	-1	-1	-1	-1	-1	-1	-1	-1	-1	-1	-1	-1	-1	-1	-1	-1	-1	-1	-1	-1	-1	-1	-1	-1
chrIX:232367:232567:-@chrIX:231757:231957:-	0.03	0.06	0.03	0.03	0.05	0.04	0.04	0.08	0.1	0.04	0.04	0.02	0.02	0.08	0.08	0.47	0.42	0.03	0.03	0.04	0.05	0.03	0.03	0.08	0.08	0.04	0.04	0.06	0.08	0.03	0.02	0.03	0.03	0.05	0.06	0.04	0.05
chrIX:257027:257227:-@chrIX:256354:256554:-	0.03	0.03	0.02	0.02	0.03	0.02	0.02	0.05	0.05	0.02	0.02	0.01	0.01	0.05	0.05	0.25	0.21	0.02	0.02	0.02	0.02	0.02	0.02	0.03	0.02	0.03	0.02	0.02	0.03	0.03	0.02	0.03	0.02	0.03	0.02	0.02	0.02
chrIX:348495:348695:-@chrIX:348163:348363:-	0.24	0.24	0.16	0.11	0.37	0.13	0.22	0.36	-1	-1	0.23	-1	-1	0.2	0.17	0.26	0.33	-1	0.29	-1	0.23	-1	-1	0.17	-1	0.17	-1	-1	0.21	-1	-1	0.11	0.08	0.15	-1	0.22	-1
chrIX:47498:47698:+@chrIX:47761:47961:+	0.28	0.17	-1	0.26	-1	-1	0.24	-1	-1	-1	-1	-1	-1	-1	0.22	0.85	0.61	-1	-1	-1	-1	-1	-1	-1	-1	-1	-1	-1	-1	-1	-1	-1	0.2	-1	-1	-1	-1
chrIX:68515:68715:+@chrIX:69150:69350:+	0.02	0.02	0.01	0.01	0.02	0.02	0.01	0.03	0.04	0.01	0.02	0.01	0.01	0.02	0.02	0.2	0.16	0.01	0.01	0.02	0.02	0.01	0.01	0.02	0.02	0.02	0.02	0.02	0.02	0.01	0.01	0.01	0.01	0.02	0.02	0.02	0.01
chrIX:99386:99586:-@chrIX:98895:99095:-	0.05	0.06	0.03	0.04	0.04	0.06	0.05	0.15	0.08	0.08	0.08	0.03	0.03	0.09	0.07	0.49	0.53	0.03	0.05	0.05	0.07	0.04	0.05	0.08	0.05	0.04	0.04	0.08	0.07	0.04	0.04	0.07	0.03	0.05	0.05	0.05	0.05
chrV:159088:159288:-@chrV:158794:158994:-	0.65	0.47	-1	0.45	0.5	0.46	0.43	-1	-1	0.42	0.66	0.63	0.73	0.53	0.4	-1	0.7	-1	0.47	-1	0.49	-1	-1	0.39	-1	0.69	-1	0.5	0.42	-1	-1	0.44	0.51	0.52	-1	0.75	0.49
chrV:166875:167075:-@chrV:166571:166771:-	-1	-1	-1	-1	-1	-1	-1	-1	-1	-1	-1	-1	-1	-1	-1	-1	-1	-1	-1	-1	-1	-1	-1	-1	-1	-1	-1	-1	-1	-1	-1	-1	-1	-1	-1	-1	-1
chrV:270149:270349:-@chrV:269551:269751:-	0.02	0.02	0.01	0.02	0.02	0.02	0.02	0.07	0.05	0.03	0.03	0.02	0.02	0.05	0.06	0.28	0.24	0.02	0.02	0.02	0.02	0.02	0.01	0.03	0.02	0.02	0.01	0.02	0.03	0.02	0.03	0.04	0.03	0.02	0.02	0.02	0.02
chrV:306125:306325:+@chrV:306792:306992:+	0.02	0.04	0.02	0.02	0.05	0.04	0.02	0.04	0.04	0.01	0.02	0.01	0.01	0.04	0.03	0.25	0.24	0.02	0.02	0.03	0.03	0.02	0.02	0.03	0.03	0.02	0.02	0.03	0.04	0.02	0.02	0.01	0.01	0.03	0.02	0.03	0.02
chrV:307546:307746:+@chrV:307849:308049:+	0.17	-1	-1	-1	-1	-1	-1	-1	-1	-1	-1	-1	-1	-1	-1	0.83	0.63	-1	-1	-1	-1	-1	-1	-1	-1	-1	-1	-1	-1	-1	-1	-1	-1	-1	-1	-1	-1
chrV:307756:307956:+@chrV:308068:308268:+	0.11	-1	-1	0.18	-1	0.14	0.16	-1	-1	-1	-1	-1	-1	-1	-1	0.67	0.6	-1	-1	-1	-1	-1	-1	-1	-1	-1	-1	-1	-1	-1	-1	-1	0.14	-1	-1	0.22	-1
chrV:348277:348477:-@chrV:348001:348201:-	0.13	-1	-1	-1	0.18	-1	0.1	-1	0.09	0.09	0.08	-1	-1	0.07	0.1	0.59	0.53	-1	-1	-1	-1	-1	-1	0.12	0.04	-1	-1	0.08	-1	-1	-1	-1	0.09	-1	-1	-1	-1
chrV:396610:396810:+@chrV:397282:397482:+	0.07	0.07	0.07	0.08	0.07	0.07	0.07	0.08	0.08	0.07	0.06	0.06	0.06	0.07	0.09	0.34	0.3	0.06	0.05	0.06	0.06	0.05	0.05	0.08	0.08	0.04	0.05	0.05	0.06	0.06	0.05	0.08	0.07	0.07	0.05	0.06	0.06
chrV:432471:432671:+@chrV:433197:433397:+	0.03	0.03	0.02	0.03	0.02	0.02	0.03	0.04	0.03	0.02	0.01	0.03	-1	0.02	0.02	0.18	0.16	0.02	0.02	0.02	0.03	0.02	0.01	0.03	0.02	-1	0.01	0.01	0.02	0.02	0.02	0.01	0.01	0.02	0.02	0.02	0.02
chrVI:203387:203587:-@chrVI:203092:203292:-	0.9	0.97	0.95	0.95	0.82	0.95	0.95	-1	0.92	0.88	0.91	-1	-1	0.87	0.88	0.9	0.84	-1	-1	-1	0.9	-1	-1	-1	-1	-1	0.89	-1	0.89	-1	-1	0.88	0.9	-1	-1	0.79	-1
chrVI:221415:221615:-@chrVI:221067:221267:-	0.39	0.33	0.27	0.48	0.23	0.29	0.37	0.28	0.25	0.27	0.24	0.22	0.24	0.31	0.29	0.59	0.46	0.27	0.22	0.26	0.31	0.27	0.23	0.28	0.33	0.31	0.29	0.26	0.3	0.28	0.27	0.25	0.26	0.27	0.28	0.24	0.22
chrVI:223772:223972:-@chrVI:223240:223440:-	0.06	0.08	0.07	0.06	0.07	0.08	0.07	0.07	0.1	0.06	0.07	0.07	0.06	0.12	0.12	0.47	0.53	0.07	0.07	0.08	0.07	0.06	0.05	0.07	0.08	0.07	0.07	0.06	0.08	0.06	0.06	0.07	0.07	0.06	0.05	0.07	0.06
chrVI:241809:242009:+@chrVI:242082:242282:+	0.89	-1	-1	-1	-1	-1	-1	-1	-1	-1	-1	NA	NA	0.83	-1	-1	-1	-1	-1	NA	NA	NA	NA	-1	-1	-1	-1	-1	-1	-1	-1	-1	0.68	-1	-1	-1	-1
chrVI:63974:64174:-@chrVI:63659:63859:-	-1	-1	-1	-1	-1	-1	-1	-1	-1	-1	-1	-1	-1	-1	-1	-1	-1	-1	-1	-1	-1	-1	-1	-1	-1	-1	-1	-1	-1	-1	-1	-1	-1	-1	-1	-1	-1
chrVI:64921:65121:-@chrVI:64153:64353:-	0.71	0.72	0.59	0.62	0.61	0.78	0.68	0.9	0.9	0.88	0.63	0.52	0.56	0.93	0.96	0.93	0.95	0.63	0.61	0.61	0.55	0.39	0.43	0.79	0.58	0.52	0.41	0.59	0.49	0.51	0.5	0.98	0.97	0.57	0.53	0.68	0.66
chrVII:148967:149167:-@chrVII:148398:148598:-	0.04	0.04	0.01	0.03	0.05	0.04	0.04	0.08	0.1	0.03	0.03	0.02	0.02	0.07	0.06	0.31	0.29	0.04	0.04	0.05	0.06	0.04	0.04	0.04	0.04	0.04	0.05	0.07	0.07	0.04	0.04	0.04	0.04	0.05	0.04	0.04	0.04
chrVII:150526:150726:-@chrVII:149983:150183:-	0.14	0.16	0.15	0.13	0.17	0.16	0.14	0.43	0.31	0.15	-1	-1	-1	0.19	0.16	0.41	0.35	0.18	0.2	-1	-1	-1	-1	0.05	0.06	-1	0.19	0.21	0.22	-1	0.22	-1	0.06	0.16	0.21	0.14	-1
chrVII:249686:249886:+@chrVII:250087:250287:+	-1	-1	-1	-1	-1	-1	-1	-1	-1	-1	-1	-1	-1	-1	-1	-1	-1	-1	-1	-1	-1	-1	-1	-1	-1	-1	-1	-1	-1	-1	-1	-1	-1	-1	-1	-1	-1
chrVII:253249:253449:-@chrVII:252985:253185:-	0.92	0.94	0.93	0.9	0.91	0.94	0.89	0.91	0.91	0.87	-1	0.94	-1	0.87	0.94	0.96	0.93	0.91	0.85	-1	0.91	-1	-1	-1	-1	0.94	0.89	0.8	0.92	-1	0.85	0.87	0.96	0.85	0.91	0.91	0.82
chrVII:365433:365633:-@chrVII:364764:364964:-	0.03	0.04	0.03	0.03	0.03	0.04	0.03	0.04	0.04	0.02	0.03	0.02	0.02	0.03	0.03	0.19	0.16	0.03	0.04	0.03	0.03	0.02	0.02	0.03	0.04	0.03	0.02	0.03	0.03	0.02	0.03	0.04	0.03	0.03	0.03	0.03	0.03
chrVII:383285:383485:+@chrVII:383581:383781:+	-1	0.88	-1	-1	0.82	0.94	0.91	0.91	0.87	-1	-1	-1	-1	-1	-1	-1	-1	-1	-1	-1	-1	-1	-1	-1	-1	-1	-1	-1	-1	-1	-1	-1	-1	-1	-1	-1	-1
chrVII:436112:436312:+@chrVII:436375:436575:+	-1	-1	-1	0.52	-1	-1	-1	-1	-1	-1	-1	-1	-1	-1	-1	-1	-1	-1	-1	-1	-1	-1	-1	-1	-1	-1	-1	-1	-1	-1	-1	-1	-1	-1	-1	-1	-1
chrVII:438398:438598:-@chrVII:437741:437941:-	0.02	0.03	0.02	0.02	0.03	0.03	0.02	0.05	0.03	0.03	0.02	0.02	0.02	0.05	0.06	0.27	0.2	0.02	0.02	0.03	0.02	0.02	0.02	0.04	0.04	0.02	0.03	0.03	0.03	0.02	0.02	0.03	0.03	0.03	0.02	0.02	0.03
chrVII:439181:439381:+@chrVII:439480:439680:+	1	1	1	1	1	1	1	1	1	1	1	1	1	1	1	1	0.99	1	1	1	1	1	1	1	1	1	1	1	1	1	1	1	1	1	1	1	1
chrVII:543438:543638:+@chrVII:543722:543922:+	0.11	0.08	0.14	0.08	0.1	0.11	0.1	0.61	0.25	0.12	0.12	0.21	0.13	0.17	0.19	0.4	0.31	0.16	0.15	-1	0.19	-1	-1	-1	0.05	0.12	0.17	0.16	0.11	-1	0.14	0.07	0.14	0.07	-1	0.25	0.1
chrVII:726838:727038:+@chrVII:727358:727558:+	0.04	0.05	0.03	0.02	0.04	0.03	0.04	0.05	0.06	0.03	0.03	0.02	0.02	0.03	0.03	0.21	0.19	0.02	0.03	0.03	0.03	0.03	0.03	0.03	0.03	0.04	0.03	0.03	0.04	0.02	0.02	0.02	0.02	0.03	0.03	0.03	0.03
chrVII:859474:859674:-@chrVII:859060:859260:-	0.17	0.14	0.18	0.1	0.19	0.17	0.14	0.18	0.23	-1	-1	-1	-1	0.2	0.13	0.54	0.51	-1	-1	-1	-1	-1	-1	0.07	0.11	-1	-1	-1	-1	-1	-1	-1	0.08	-1	-1	0.22	-1
chrVIII:103857:104057:-@chrVIII:103417:103617:-	0.99	0.99	0.99	0.99	0.99	0.99	0.99	0.99	0.98	0.98	0.98	0.98	0.96	0.98	0.99	0.97	0.97	0.98	0.97	0.97	0.97	0.97	0.98	0.96	0.98	0.99	0.98	0.98	0.98	0.97	0.99	0.99	0.99	0.99	0.95	0.98	0.98
chrVIII:104205:104405:+@chrVIII:104804:105004:+	0.02	0.03	0.01	0.01	0.02	0.02	0.02	0.04	0.04	0.02	0.03	0.01	0.01	0.02	0.03	0.29	0.25	0.02	0.02	0.03	0.04	0.03	0.03	0.05	0.06	0.03	0.03	0.04	0.05	0.02	0.02	0.02	0.01	0.03	0.03	0.02	0.03
chrVIII:107631:107831:+@chrVIII:107895:108095:+	-1	-1	-1	0.6	0.73	0.44	-1	-1	-1	-1	-1	-1	-1	-1	0.61	0.99	0.99	-1	-1	-1	-1	-1	-1	0.38	0.36	-1	-1	-1	-1	-1	-1	0.31	0.27	-1	-1	-1	-1
chrVIII:126351:126551:+@chrVIII:127113:127313:+	0.08	0.11	0.09	0.08	0.08	0.08	0.08	0.1	0.12	0.07	0.07	0.05	0.05	0.07	0.09	0.51	0.42	0.05	0.06	0.06	0.06	0.06	0.05	0.06	0.09	0.06	0.06	0.06	0.07	0.05	0.05	0.06	0.05	0.07	0.06	0.06	0.06
chrVIII:129328:129528:+@chrVIII:129648:129848:+	-1	-1	-1	-1	-1	-1	-1	-1	-1	-1	-1	-1	-1	-1	-1	-1	-1	-1	-1	-1	-1	-1	-1	-1	-1	-1	-1	-1	-1	-1	-1	-1	-1	-1	-1	-1	-1
chrVIII:138409:138609:-@chrVIII:138040:138240:-	-1	-1	-1	-1	-1	-1	-1	-1	0.62	-1	-1	-1	-1	-1	-1	0.79	0.81	-1	-1	-1	-1	-1	-1	-1	-1	-1	-1	-1	-1	-1	-1	-1	0.43	-1	-1	-1	-1
chrVIII:187677:187877:-@chrVIII:187314:187514:-	0.03	0.02	-1	-1	0.02	-1	0.03	-1	-1	-1	-1	-1	-1	0.04	-1	0.35	0.23	-1	-1	0.04	-1	-1	-1	-1	-1	-1	-1	-1	0.04	-1	-1	0.03	0.03	-1	-1	0.03	-1
chrVIII:250955:251155:+@chrVIII:251249:251449:+	0.95	0.91	0.91	0.91	0.93	0.93	0.94	0.9	-1	-1	-1	-1	-1	0.94	0.82	-1	-1	-1	0.9	0.93	-1	-1	-1	-1	-1	-1	0.85	-1	-1	-1	0.86	-1	0.83	-1	-1	-1	-1
chrVIII:255751:255951:-@chrVIII:255437:255637:-	-1	-1	-1	-1	-1	-1	-1	-1	-1	-1	-1	NA	NA	-1	-1	-1	-1	-1	-1	-1	-1	-1	-1	-1	-1	-1	-1	-1	-1	-1	-1	-1	-1	-1	-1	-1	-1
chrVIII:298485:298685:-@chrVIII:298160:298360:-	-1	-1	-1	-1	-1	-1	-1	-1	-1	-1	-1	-1	-1	-1	-1	0.33	0.31	-1	-1	-1	-1	-1	-1	-1	-1	-1	-1	-1	-1	-1	-1	-1	-1	-1	-1	-1	-1
chrVIII:354664:354864:+@chrVIII:354956:355156:+	-1	-1	-1	-1	-1	-1	-1	-1	-1	-1	-1	-1	-1	-1	-1	-1	NA	-1	-1	-1	-1	-1	-1	-1	-1	-1	-1	-1	-1	-1	-1	-1	-1	-1	-1	-1	-1
chrVIII:382748:382948:-@chrVIII:382106:382306:-	0.1	0.13	0.08	0.07	0.12	0.07	0.11	0.12	0.12	0.05	0.08	0.06	0.04	0.12	0.11	0.46	0.35	0.07	0.07	0.09	0.1	0.08	0.05	0.08	0.09	0.1	0.11	0.08	0.12	0.09	0.07	0.04	0.04	0.08	0.08	0.07	0.09
chrX:157250:157450:-@chrX:156589:156789:-	0.02	0.02	0.01	0.01	0.03	0.02	0.02	0.04	0.04	0.02	0.02	0.01	0.01	0.03	0.03	0.37	0.34	0.01	0.02	0.03	0.03	0.02	0.02	0.03	0.03	0.02	0.03	0.03	0.03	0.02	0.02	0.01	0.01	0.03	0.03	0.02	0.02
chrX:172753:172953:-@chrX:172232:172432:-	0.31	0.49	0.29	0.24	0.29	0.29	0.39	-1	-1	0.32	-1	0.87	-1	0.18	0.2	1	1	0.17	0.26	0.14	0.17	0.37	-1	0.27	0.27	0.23	0.2	0.25	0.2	-1	0.23	0.58	0.5	0.28	0.17	0.3	0.2
chrX:365584:365784:+@chrX:365903:366103:+	0.56	0.5	-1	-1	0.51	0.34	0.54	-1	-1	-1	-1	-1	-1	-1	-1	-1	-1	-1	-1	-1	-1	-1	-1	-1	-1	-1	-1	-1	-1	-1	-1	-1	-1	-1	-1	-1	-1
chrX:387436:387636:-@chrX:387148:387348:-	0.92	-1	-1	-1	-1	0.87	0.79	-1	-1	-1	-1	-1	-1	-1	-1	-1	-1	-1	-1	-1	-1	-1	-1	-1	-1	-1	-1	-1	-1	-1	-1	-1	-1	-1	-1	-1	-1
chrX:396571:396771:-@chrX:396293:396493:-	-1	-1	-1	-1	-1	-1	-1	-1	-1	-1	-1	-1	-1	-1	-1	-1	-1	-1	-1	-1	-1	-1	-1	-1	-1	-1	-1	-1	-1	-1	-1	0.1	-1	-1	-1	-1	-1
chrX:435027:435227:+@chrX:435344:435544:+	0.08	0.09	0.06	0.05	0.08	0.09	0.06	0.12	0.1	0.07	0.06	0.05	-1	0.06	0.08	0.15	0.2	0.06	0.06	0.1	0.11	0.09	0.04	0.11	0.09	0.02	0.04	0.05	0.15	-1	0.04	0.04	0.03	0.11	0.12	0.12	0.06
chrX:469264:469464:-@chrX:468983:469183:-	0.83	-1	-1	-1	0.68	0.69	-1	0.82	-1	-1	-1	-1	-1	-1	-1	0.9	0.94	-1	-1	-1	-1	-1	-1	-1	0.84	-1	-1	-1	-1	-1	-1	-1	0.82	-1	-1	-1	-1
chrX:50412:50612:-@chrX:50068:50268:-	0.27	0.3	0.26	0.31	0.17	0.18	0.26	-1	-1	0.25	-1	0.32	-1	0.32	0.21	0.6	0.66	-1	-1	-1	0.36	-1	-1	-1	-1	-1	0.29	-1	0.47	-1	0.33	0.35	0.52	0.44	-1	0.28	0.37
chrX:608282:608482:+@chrX:608582:608782:+	0.06	0.07	0.04	0.04	0.07	0.08	0.05	0.1	-1	0.06	-1	0.05	0.04	0.1	0.11	0.52	0.44	0.05	0.08	0.05	0.07	0.07	0.08	0.1	0.09	0.09	0.08	0.08	0.09	0.05	0.05	0.06	0.03	0.08	0.09	0.08	0.07
chrX:649658:649858:-@chrX:649314:649514:-	-1	-1	-1	-1	-1	-1	-1	-1	-1	-1	-1	-1	-1	-1	-1	-1	-1	-1	-1	-1	-1	-1	-1	-1	-1	-1	-1	-1	-1	-1	-1	-1	-1	-1	-1	-1	-1
chrX:703055:703255:-@chrX:702598:702798:-	0.05	0.09	0.07	0.04	0.1	0.05	0.05	0.04	0.06	0.03	0.05	0.04	0.03	0.08	0.05	0.2	0.24	0.05	0.06	0.09	0.11	0.08	0.13	0.05	0.08	0.12	0.1	0.11	0.13	0.07	0.07	0.03	0.02	0.08	0.07	0.04	0.05
chrX:75738:75938:+@chrX:76325:76525:+	0.01	0.01	0.01	0.01	0.01	0.01	0.01	0.02	0.02	0.01	0.01	0.01	0.01	0.01	0.02	0.21	0.22	0.01	0.01	0.01	0.01	0.01	0.01	0.02	0.01	0.01	0.01	0.01	0.01	0.01	0.01	0.01	0.01	0.01	0.01	0.01	0.01
chrX:90894:91094:+@chrX:91412:91612:+	0.02	0.02	0.01	0.01	0.03	0.02	0.02	0.05	0.04	0.02	0.02	0.01	0.02	0.03	0.03	0.17	0.17	0.02	0.01	0.03	0.02	0.03	0.02	0.02	0.02	0.02	0.02	0.04	0.04	0.02	0.02	0.02	0.01	0.03	0.03	0.02	0.02
chrXI:166199:166399:+@chrXI:166488:166688:+	-1	-1	-1	-1	0.37	-1	-1	0.3	-1	-1	-1	-1	-1	-1	-1	0.28	0.26	-1	-1	-1	-1	-1	-1	-1	-1	-1	-1	-1	-1	-1	-1	-1	-1	-1	-1	-1	-1
chrXI:282895:283095:+@chrXI:283422:283622:+	0.05	0.04	0.02	0.03	0.03	0.02	0.03	0.05	-1	0.04	-1	0.02	-1	0.05	0.06	0.39	-1	0.03	-1	0.04	0.04	-1	-1	-1	-1	-1	-1	0.05	0.04	0.02	-1	0.07	0.06	0.03	0.05	0.02	0.03
chrXI:430597:430797:-@chrXI:430255:430455:-	0.38	0.32	0.4	0.31	0.3	0.37	0.36	0.51	0.44	0.39	0.27	0.4	0.38	0.45	0.26	0.67	0.75	0.38	0.36	0.58	0.48	0.31	0.45	0.26	0.22	0.24	0.28	0.46	0.34	0.4	0.31	0.12	0.1	0.47	0.47	0.46	0.39
chrXI:431834:432034:+@chrXI:432433:432633:+	0.02	0.03	0.01	0.01	0.03	0.02	0.03	0.04	0.05	0.02	0.02	0.01	0.01	0.04	0.04	0.18	0.17	0.02	0.02	0.03	0.04	0.02	0.03	0.04	0.04	0.02	0.03	0.03	0.04	0.02	0.02	0.02	0.01	0.03	0.03	0.03	0.03
chrXI:93466:93666:-@chrXI:93166:93366:-	0.16	0.1	0.27	0.28	0.25	0.14	0.23	-1	0.33	0.28	-1	0.31	-1	-1	0.34	0.69	0.92	-1	0.22	-1	-1	-1	-1	-1	0.33	-1	0.27	0.29	0.42	-1	0.26	0.32	0.37	0.24	-1	0.31	0.31
chrXII:1028668:1028868:+@chrXII:1029253:1029453:+	0.06	0.07	0.04	0.04	0.07	0.06	0.07	0.1	0.1	0.05	0.05	0.04	0.04	0.06	0.08	0.66	0.49	0.05	0.06	0.09	0.08	0.06	0.09	0.04	0.05	0.11	0.11	0.11	0.11	0.07	0.07	0.05	0.04	0.08	0.1	0.06	0.06
chrXII:233886:234086:-@chrXII:233442:233642:-	1	1	1	1	1	1	1	1	1	1	1	1	1	1	1	1	1	1	1	1	1	1	1	1	1	1	1	1	1	1	1	1	1	1	1	1	1
chrXII:263005:263205:+@chrXII:263595:263795:+	0.15	0.14	0.14	0.14	0.16	0.15	0.16	0.22	0.25	0.19	0.19	0.18	0.15	0.27	0.24	0.37	0.36	0.18	0.13	0.18	0.19	0.18	0.13	0.23	0.22	0.13	0.14	0.21	0.22	0.15	0.18	0.45	0.31	0.22	0.2	0.17	0.22
chrXII:281629:281829:-@chrXII:281227:281427:-	0.98	0.97	0.96	0.98	0.96	0.98	0.98	0.89	-1	0.87	0.92	0.95	0.92	0.97	0.97	0.94	0.97	0.85	0.93	0.95	0.94	0.92	0.93	0.97	0.95	0.94	0.91	0.98	0.97	0.95	0.97	0.96	0.98	0.92	0.97	0.95	0.98
chrXII:286557:286757:-@chrXII:286267:286467:-	-1	-1	-1	-1	-1	-1	-1	-1	-1	-1	-1	-1	-1	-1	-1	0.73	0.93	-1	-1	-1	-1	-1	-1	-1	-1	-1	-1	-1	-1	-1	-1	-1	-1	-1	-1	-1	-1
chrXII:28835:29035:-@chrXII:28262:28462:-	0.9	0.96	0.85	0.94	0.92	0.91	0.92	0.92	0.93	0.86	0.9	NA	NA	0.94	0.91	0.94	0.97	-1	0.91	-1	0.92	NA	-1	0.84	0.83	0.88	0.9	0.88	-1	-1	0.94	0.92	0.95	0.76	-1	0.85	0.87
chrXII:40401:40601:-@chrXII:40021:40221:-	-1	0.02	-1	0.01	0.02	0.02	0.02	-1	-1	-1	-1	-1	-1	0.03	0.03	0.19	0.15	-1	-1	-1	-1	-1	-1	-1	-1	-1	-1	-1	-1	-1	-1	-1	0.01	-1	-1	-1	-1
chrXII:466255:466455:-@chrXII:456916:457116:-	0.99	0.89	1	1	1	1	0.99	0.82	0.87	0.97	0.95	0.98	0.99	0.96	0.97	1	1	1	1	0.95	0.87	0.96	0.97	1	1	0.95	0.93	0.99	0.99	0.94	0.94	0.97	1	1	1	1	1
chrXII:564514:564714:-@chrXII:564254:564454:-	-1	-1	-1	-1	-1	-1	-1	-1	-1	-1	-1	-1	-1	-1	-1	-1	-1	-1	-1	-1	-1	-1	-1	-1	-1	-1	-1	-1	-1	-1	-1	-1	-1	-1	NA	-1	-1
chrXII:694182:694382:+@chrXII:694473:694673:+	-1	-1	-1	-1	-1	-1	-1	-1	-1	-1	-1	-1	-1	-1	-1	-1	-1	-1	-1	-1	-1	-1	-1	-1	-1	-1	-1	-1	-1	-1	-1	-1	-1	-1	-1	-1	-1
chrXII:713156:713356:-@chrXII:712525:712725:-	0.04	0.04	0.03	0.02	0.04	0.03	0.03	0.07	0.06	0.03	0.03	0.01	0.01	0.06	0.07	0.42	0.31	0.02	0.02	0.03	0.03	0.03	0.02	0.04	0.03	0.02	0.03	0.03	0.04	0.03	0.03	0.03	0.02	0.04	0.03	0.04	0.04
chrXII:766130:766330:-@chrXII:765873:766073:-	-1	-1	-1	-1	-1	-1	-1	-1	-1	-1	-1	-1	-1	-1	-1	-1	-1	-1	-1	-1	-1	-1	-1	-1	-1	-1	-1	-1	-1	-1	-1	-1	-1	-1	-1	-1	-1
chrXII:796336:796536:-@chrXII:795712:795912:-	0.05	0.08	0.04	0.03	0.06	0.04	0.05	0.09	0.12	0.04	0.05	0.03	0.02	0.1	0.09	0.48	0.5	0.05	0.05	0.06	0.05	0.05	0.06	0.07	0.07	0.06	0.05	0.06	0.1	0.04	0.05	0.03	0.02	0.05	0.05	0.05	0.05
chrXII:819130:819330:+@chrXII:819778:819978:+	0.06	0.08	0.04	0.03	0.08	0.05	0.05	0.08	0.07	0.04	0.05	0.03	0.03	0.06	0.06	0.53	0.45	0.01	0.03	0.06	0.07	0.05	0.04	0.04	0.04	0.05	0.05	0.07	0.06	0.03	0.04	0.03	0.03	0.05	0.04	0.04	0.05
chrXII:856374:856574:+@chrXII:857058:857258:+	0.13	0.13	0.08	0.09	0.11	0.09	0.13	0.11	0.1	0.07	0.09	0.08	0.09	0.09	0.09	0.23	0.22	0.09	0.1	0.11	0.1	0.1	0.07	0.07	0.04	0.08	0.08	0.09	0.11	0.08	0.1	0.1	0.12	0.09	0.09	0.11	0.1
chrXII:931699:931899:-@chrXII:931149:931349:-	0.02	0.03	0.01	0.01	0.03	0.03	0.02	0.05	0.06	0.03	0.03	0.01	0.01	0.05	0.04	0.33	0.31	0.02	0.02	0.02	0.02	0.02	0.02	0.03	0.04	0.02	0.02	0.03	0.03	0.02	0.02	-1	0.03	0.03	0.02	0.02	0.02
chrXII:982539:982739:-@chrXII:982258:982458:-	0.96	0.95	0.97	0.95	0.94	0.94	0.96	-1	-1	0.95	NA	-1	-1	-1	0.93	0.95	0.94	-1	-1	-1	-1	-1	-1	NA	-1	NA	0.93	NA	-1	NA	-1	0.93	0.97	-1	-1	-1	-1
chrXIII:124158:124358:-@chrXIII:123542:123742:-	0.03	0.07	0.02	0.02	0.04	0.04	0.04	0.09	0.09	0.03	0.04	0.02	0.01	0.08	0.07	0.38	0.4	0.03	0.04	0.07	0.06	0.04	0.06	0.07	0.1	0.03	0.04	0.06	0.09	0.03	0.03	0.03	0.02	0.07	0.05	0.04	0.04
chrXIII:140184:140384:-@chrXIII:139890:140090:-	-1	-1	-1	-1	-1	-1	-1	-1	-1	-1	-1	-1	-1	-1	-1	-1	-1	-1	-1	-1	-1	-1	-1	-1	-1	-1	-1	-1	-1	-1	-1	-1	-1	-1	-1	-1	-1
chrXIII:163717:163917:-@chrXIII:163108:163308:-	0.26	0.28	0.15	0.2	0.15	0.14	0.24	0.17	0.13	0.18	0.22	0.13	0.05	0.16	0.22	-1	-1	0.11	0.1	0.24	0.39	0.21	0.19	-1	0.38	0.14	0.14	0.16	0.21	0.14	0.13	0.13	0.08	0.17	0.15	0.12	0.15
chrXIII:205897:206097:+@chrXIII:206204:206404:+	0.38	-1	-1	-1	0.42	-1	0.34	-1	-1	-1	-1	-1	-1	-1	-1	-1	-1	-1	-1	-1	-1	-1	-1	-1	-1	-1	-1	-1	-1	-1	-1	-1	-1	-1	-1	-1	-1
chrXIII:223782:223982:-@chrXIII:223180:223380:-	0.01	0.02	0.01	0.01	0.01	0.01	0.01	0.02	0.03	0.01	0.01	0.01	0	0.02	0.02	0.3	0.22	0.01	0.01	0.01	0.01	0.01	0.01	0.03	0.03	0.01	0.01	0.02	0.02	0.01	0	0.01	0.01	0.01	0.01	0.01	0.01
chrXIII:225691:225891:+@chrXIII:226290:226490:+	0	0.01	0	0	0.01	0.01	0.01	0.01	0.02	0.01	0.01	0	0	0.01	0.01	0.22	0.19	0	0	0.01	0.01	0	-1	0.01	0.01	0.01	0.01	0.01	0.01	0.01	0.01	0.01	0	0.01	0.01	0.01	0.01
chrXIII:236391:236591:+@chrXIII:236954:237154:+	0.16	0.09	-1	0.2	0.09	0.11	0.12	0.33	-1	-1	-1	-1	-1	-1	-1	0.71	0.83	-1	-1	-1	-1	-1	-1	-1	-1	-1	-1	-1	-1	-1	-1	0.59	0.52	0.21	-1	-1	-1
chrXIII:337617:337817:+@chrXIII:337904:338104:+	-1	-1	-1	-1	-1	-1	-1	-1	-1	-1	-1	-1	-1	-1	-1	-1	-1	-1	-1	-1	-1	-1	-1	-1	-1	-1	-1	-1	-1	-1	-1	-1	-1	-1	-1	-1	-1
chrXIII:500152:500352:-@chrXIII:499678:499878:-	0.03	0.02	0.02	0.02	0.03	0.03	0.03	0.03	0.03	0.02	0.04	0.03	0.03	0.04	0.04	0.2	0.22	0.03	0.03	0.03	0.04	0.03	0.03	0.04	0.03	0.04	0.02	0.04	0.03	0.03	0.03	0.04	0.04	0.04	0.03	0.03	0.03
chrXIII:558002:558202:-@chrXIII:557628:557828:-	0.99	0.99	0.99	0.99	0.99	0.99	0.99	0.97	0.94	0.97	0.98	0.99	0.99	0.98	0.99	0.96	0.97	0.98	0.99	0.98	0.96	0.97	0.97	0.97	0.98	0.97	0.98	0.94	0.96	0.97	0.94	0.98	0.99	0.97	0.96	0.98	0.98
chrXIII:559582:559782:+@chrXIII:560158:560358:+	0.62	0.54	0.37	0.29	0.59	0.39	0.38	0.78	0.71	-1	-1	-1	-1	-1	0.22	0.33	0.72	-1	-1	0.74	0.83	-1	-1	-1	-1	-1	-1	-1	-1	-1	-1	-1	-1	0.68	-1	-1	-1
chrXIII:650960:651160:+@chrXIII:651624:651824:+	0.14	0.15	0.07	0.08	0.12	0.1	0.13	0.21	0.23	0.14	0.15	0.07	0.04	0.24	0.22	0.74	0.63	0.13	0.11	0.18	0.17	0.22	0.2	0.22	0.23	0.19	0.17	0.23	0.24	0.14	0.11	0.17	0.11	0.2	0.2	0.12	0.16
chrXIII:652848:653048:-@chrXIII:652575:652775:-	0.32	-1	-1	-1	0.32	0.23	-1	0.53	0.35	-1	-1	-1	-1	-1	-1	0.4	0.35	-1	-1	-1	-1	-1	-1	-1	0.09	-1	-1	-1	-1	-1	-1	0.18	0.14	-1	-1	-1	-1
chrXIII:721346:721546:-@chrXIII:720998:721198:-	0.09	0.1	0.05	0.09	0.1	0.11	0.07	0.32	0.21	0.11	0.09	0.08	0.09	0.13	0.12	0.42	0.47	0.06	0.1	0.12	0.12	0.1	0.11	0.11	0.09	0.05	0.08	0.13	0.1	0.05	0.1	0.15	0.12	0.08	0.06	0.09	0.08
chrXIII:732265:732465:+@chrXIII:732876:733076:+	0.02	0.03	0.02	0.02	0.02	0.03	0.02	0.05	0.05	0.02	0.02	0.02	0.02	0.05	0.05	0.49	0.36	0.03	0.02	0.02	0.02	0.01	0.01	0.05	0.04	0.02	0.02	0.03	0.04	0.02	0.02	0.02	0.02	0.03	0.03	0.03	0.02
chrXIII:754220:754420:-@chrXIII:753542:753742:-	0.2	0.25	0.1	0.11	0.19	0.18	0.2	0.29	0.54	0.18	0.15	0.06	0.04	0.43	0.42	0.84	0.83	0.16	0.21	0.18	0.19	0.18	0.24	0.24	0.28	0.28	0.25	0.26	0.26	0.22	0.15	0.16	0.1	0.14	0.16	0.13	0.17
chrXIII:82090:82290:+@chrXIII:82374:82574:+	-1	-1	-1	-1	-1	-1	-1	-1	-1	-1	-1	-1	-1	-1	-1	-1	-1	-1	-1	-1	-1	-1	-1	-1	-1	-1	-1	-1	-1	-1	-1	-1	-1	-1	-1	-1	-1
chrXIII:854616:854816:+@chrXIII:854899:855099:+	0.81	0.57	0.8	-1	0.55	0.86	0.72	-1	-1	-1	-1	0.77	-1	0.58	0.52	0.82	0.9	-1	-1	-1	-1	-1	-1	-1	-1	-1	-1	-1	-1	-1	-1	0.86	0.89	-1	-1	0.83	-1
chrXIII:914649:914849:-@chrXIII:914204:914404:-	0.99	0.99	0.99	0.98	0.94	0.96	0.99	0.97	0.96	0.97	0.97	0.92	0.92	0.97	0.97	0.93	0.89	0.95	0.97	0.98	0.97	0.96	0.97	0.93	0.94	0.99	0.99	0.97	0.98	0.97	0.98	0.94	0.97	0.98	0.96	0.97	0.97
chrXIII:99376:99576:-@chrXIII:99059:99259:-	0.22	0.26	-1	-1	0.24	0.23	0.31	-1	-1	0.18	0.13	-1	-1	0.29	-1	-1	0.95	-1	0.23	-1	-1	-1	-1	-1	-1	0.51	-1	-1	-1	-1	-1	0.2	0.24	0.28	-1	0.17	-1
chrXIV:273602:273802:-@chrXIV:272187:272387:-	0.89	0.85	0.88	0.86	0.83	0.65	0.9	0.92	0.94	0.72	0.84	-1	-1	0.77	0.88	0.91	0.87	0.92	0.93	0.84	0.77	0.8	0.88	0.94	0.92	0.92	0.81	-1	0.76	0.85	0.64	0.93	0.92	0.85	0.76	0.88	0.64
chrXIV:350757:350957:+@chrXIV:351054:351254:+	0.18	0.32	0.39	0.33	-1	0.23	0.17	-1	-1	-1	-1	-1	-1	-1	0.35	0.92	0.89	-1	-1	-1	-1	-1	-1	-1	-1	-1	-1	-1	-1	-1	-1	-1	-1	-1	-1	-1	-1
chrXIV:414711:414911:+@chrXIV:415914:416114:+	0.04	0.06	0.05	0.06	0.04	0.04	0.04	0.07	-1	0.06	0.07	0.03	0.02	0.16	0.19	0.57	0.71	0.03	0.03	0.03	0.02	0.03	0.02	0.09	0.05	0.03	0.03	0.04	0.04	0.05	0.02	0.08	0.06	0.02	0.02	0.04	0.04
chrXIV:48093:48293:+@chrXIV:48402:48602:+	-1	-1	-1	-1	-1	-1	-1	-1	-1	-1	-1	-1	-1	-1	-1	-1	-1	-1	-1	-1	-1	-1	-1	-1	-1	-1	-1	-1	-1	-1	-1	-1	-1	-1	-1	-1	-1
chrXIV:545091:545291:+@chrXIV:545371:545571:+	0.28	-1	-1	-1	-1	-1	-1	-1	-1	-1	-1	-1	-1	-1	-1	0.86	0.94	-1	-1	-1	-1	-1	-1	-1	-1	-1	-1	-1	-1	-1	-1	-1	-1	-1	-1	-1	-1
chrXIV:615866:616066:+@chrXIV:616413:616613:+	0.95	0.87	0.93	0.83	0.88	0.89	0.84	0.87	0.85	0.86	0.85	0.85	0.9	0.83	0.93	0.94	0.95	0.8	0.87	0.93	0.87	0.82	0.8	0.77	0.84	0.85	0.94	0.72	0.92	0.86	0.85	0.88	0.93	0.93	0.89	0.87	0.9
chrXIV:622744:622944:+@chrXIV:623287:623487:+	0.34	0.24	0.15	0.26	0.23	0.21	0.22	0.48	0.29	0.2	0.22	-1	-1	0.23	0.24	0.36	0.5	0.19	0.21	0.22	0.18	-1	0.18	0.19	0.19	0.15	0.14	0.2	0.32	0.16	0.18	0.23	0.35	0.19	0.19	0.15	0.23
chrXIV:64451:64651:-@chrXIV:63818:64018:-	0.19	0.18	0.07	0.06	0.12	0.11	0.17	0.27	0.21	0.21	0.17	0.13	0.13	0.08	0.1	-1	0.11	0.1	0.11	0.15	0.14	0.11	0.09	0.15	0.1	0.12	0.11	0.09	0.12	0.07	0.09	0.13	0.12	0.09	0.09	0.09	0.08
chrXIV:722303:722503:-@chrXIV:721570:721770:-	0.05	0.06	0.05	0.06	0.02	0.03	0.06	0.22	-1	-1	-1	0.08	-1	0.06	0.1	0.39	0.89	-1	-1	-1	0.04	0.05	-1	-1	-1	-1	-1	0.04	-1	-1	-1	0.08	0.07	0.04	0.05	0.08	0.05
chrXIV:728354:728554:+@chrXIV:728922:729122:+	0.99	0.99	0.99	0.99	0.99	0.99	0.99	0.98	0.98	0.97	0.97	0.99	0.98	0.98	0.98	0.91	0.96	0.98	0.98	0.98	0.98	0.98	0.98	0.98	0.98	0.98	0.98	0.97	0.98	0.97	0.98	0.99	0.99	0.98	0.98	0.98	0.98
chrXV:241026:241226:-@chrXV:240747:240947:-	-1	-1	-1	-1	-1	-1	-1	-1	-1	-1	-1	-1	NA	-1	-1	0.8	0.81	-1	-1	-1	-1	-1	-1	-1	-1	-1	-1	-1	-1	-1	-1	-1	-1	-1	-1	-1	-1
chrXV:242505:242705:-@chrXV:242241:242441:-	-1	-1	-1	NA	-1	-1	-1	0.92	0.94	-1	-1	NA	NA	0.79	-1	-1	-1	-1	-1	NA	NA	NA	-1	-1	NA	-1	-1	NA	NA	NA	NA	0.94	-1	NA	NA	NA	NA
chrXV:349599:349799:-@chrXV:349297:349497:-	0.96	0.96	0.93	0.94	NA	-1	0.92	NA	NA	-1	-1	0.93	-1	-1	-1	0.94	0.98	NA	-1	-1	-1	-1	-1	-1	-1	-1	-1	-1	-1	-1	-1	-1	-1	-1	-1	-1	-1
chrXV:373699:373899:+@chrXV:374123:374323:+	0.93	0.82	0.83	0.89	0.93	0.94	0.92	0.92	0.84	0.88	-1	0.86	-1	-1	0.94	0.79	0.92	-1	0.9	-1	0.89	-1	-1	-1	0.89	-1	0.87	-1	0.89	-1	0.9	0.92	0.88	-1	-1	0.86	-1
chrXV:423735:423935:-@chrXV:423457:423657:-	0.97	0.96	0.94	0.96	0.95	0.97	0.98	0.96	0.96	0.94	0.9	-1	-1	0.94	0.94	0.96	0.95	0.94	0.95	0.92	-1	-1	0.93	0.94	0.95	0.93	0.94	0.92	-1	0.92	-1	0.98	0.98	0.91	-1	0.92	-1
chrXV:552875:553075:-@chrXV:552465:552665:-	0.06	0.06	0.05	0.05	0.05	0.05	0.05	0.1	0.09	0.05	0.06	0.03	0.02	0.08	0.08	0.36	0.32	0.09	0.07	0.08	0.05	0.07	0.08	0.06	0.04	0.05	0.06	0.05	0.1	0.05	0.05	0.03	0.02	0.06	0.06	0.05	0.04
chrXV:678791:678991:-@chrXV:678179:678379:-	0.01	0.01	0.01	0.01	0.01	0.01	0.01	0.02	0.02	0.01	0.01	0.01	0.01	0.02	0.02	0.46	0.45	0.01	0.01	0.01	0.01	0.01	0.01	0.01	0.01	0.01	0.01	0.01	0.01	0.01	0.01	0.02	0.01	0.01	0.01	0.01	0.01
chrXV:80160:80360:+@chrXV:80775:80975:+	0.03	0.04	0.01	0.02	0.02	0.02	0.03	0.04	0.04	0.01	0.01	0.01	0.01	0.04	0.03	0.54	0.52	0.01	0.02	0.03	0.03	0.02	0.01	0.03	0.03	0.02	0.02	0.04	0.04	0.02	0.02	0.02	0.01	0.03	0.03	0.02	0.02
chrXV:901194:901394:-@chrXV:900567:900767:-	0.11	0.13	0.07	0.07	0.12	0.08	0.1	0.08	0.14	0.05	0.05	0.04	0.03	0.12	0.11	0.66	0.55	0.03	0.06	0.11	0.11	0.09	0.1	0.06	0.05	0.1	0.1	0.1	0.11	0.1	0.07	0.05	0.03	0.08	0.08	0.07	0.09
chrXV:92831:93031:-@chrXV:92240:92440:-	0.1	0.09	0.06	0.1	0.07	0.1	0.1	0.14	0.14	0.11	0.09	0.1	0.12	0.13	0.15	0.56	0.51	0.11	0.1	0.1	0.12	0.1	0.09	0.14	0.11	0.08	0.09	0.11	0.11	0.09	0.11	0.13	0.13	0.12	0.1	0.1	0.11
chrXV:94291:94491:-@chrXV:93643:93843:-	0.12	0.12	0.08	0.13	0.09	0.1	0.12	0.1	0.12	0.1	0.1	0.09	0.09	0.1	0.13	0.26	0.19	0.1	0.09	0.1	0.11	0.08	0.08	0.13	0.1	0.08	0.09	0.09	0.09	0.09	0.09	0.11	0.09	0.11	0.1	0.09	0.09
chrXVI:115018:115218:+@chrXVI:115294:115494:+	-1	-1	-1	-1	-1	-1	-1	-1	-1	-1	-1	NA	NA	-1	-1	0.91	0.92	-1	-1	NA	-1	NA	-1	-1	-1	-1	-1	NA	NA	NA	-1	-1	-1	-1	NA	NA	NA
chrXVI:172962:173162:+@chrXVI:173572:173772:+	0.31	0.19	0.07	0.17	0.21	0.19	0.33	-1	-1	0.34	0.31	0.11	0.15	0.15	0.24	0.92	0.87	0.13	0.08	0.32	0.24	0.15	0.1	0.49	0.3	0.18	0.18	0.22	0.25	0.11	0.13	0.93	0.95	0.26	0.33	0.33	0.25
chrXVI:173465:173665:+@chrXVI:174073:174273:+	0.12	0.21	0.27	0.12	0.22	0.16	0.13	0.06	0.08	0.1	0.1	0.09	0.06	0.15	0.12	0.13	0.14	0.09	0.12	0.14	0.15	0.1	0.14	0.08	0.13	0.17	0.15	0.1	0.13	0.11	0.08	0.05	0.04	0.08	0.07	0.07	0.07
chrXVI:218446:218646:+@chrXVI:218747:218947:+	-1	-1	-1	-1	-1	-1	-1	-1	-1	-1	-1	-1	-1	-1	-1	-1	-1	-1	-1	-1	-1	-1	-1	-1	-1	-1	-1	-1	-1	-1	-1	-1	-1	-1	-1	-1	-1
chrXVI:244026:244226:-@chrXVI:243289:243489:-	0.98	0.97	0.97	0.96	0.98	0.98	0.98	0.97	0.94	0.96	0.94	0.96	0.9	0.96	0.97	0.97	0.97	0.93	0.96	0.95	0.96	0.94	0.96	0.96	0.97	0.97	0.97	0.95	0.97	0.95	0.96	0.98	0.98	0.96	0.94	0.98	0.96
chrXVI:271103:271303:+@chrXVI:271897:272097:+	0.99	0.99	0.99	0.99	0.99	0.99	0.99	0.98	0.98	0.99	0.99	0.97	0.97	0.98	0.99	0.98	0.99	0.97	0.98	0.98	0.97	0.98	0.98	0.97	0.97	0.96	0.99	0.98	0.98	0.97	0.98	0.99	0.99	0.99	0.98	0.98	0.98
chrXVI:281940:282140:+@chrXVI:282666:282866:+	0.03	0.03	0.02	0.02	0.03	0.03	0.03	0.04	0.05	0.02	0.03	0.01	0.01	0.04	0.04	0.25	0.23	0.02	0.02	0.03	0.03	0.02	0.02	0.05	0.05	0.03	0.04	0.04	0.04	0.03	0.02	0.02	0.01	0.02	0.02	0.02	0.02
chrXVI:305106:305306:+@chrXVI:305412:305612:+	0.15	0.16	0.13	0.21	0.21	0.06	0.19	0.3	0.39	0.15	0.11	0.11	0.17	0.22	0.21	0.53	0.6	0.11	0.15	0.28	0.18	0.19	0.1	0.13	0.07	0.23	0.18	0.23	0.26	0.21	0.27	0.38	0.55	0.3	0.32	0.22	0.18
chrXVI:345597:345797:-@chrXVI:345244:345444:-	-1	-1	-1	-1	0.25	-1	-1	-1	-1	-1	-1	-1	-1	-1	-1	-1	-1	-1	-1	-1	-1	NA	-1	-1	0.23	-1	-1	-1	-1	-1	-1	-1	-1	-1	NA	-1	-1
chrXVI:378390:378590:-@chrXVI:377795:377995:-	0.02	0.03	0.01	0.01	0.02	0.02	0.02	0.04	0.06	0.02	0.02	0.01	0.01	0.03	0.03	0.23	0.22	0.01	0.01	0.03	0.03	0.02	0.02	0.02	0.03	-1	0.02	0.04	0.04	0.02	0.01	0.01	0.01	0.03	0.02	0.02	0.02
chrXVI:404756:404956:+@chrXVI:405458:405658:+	0.18	0.16	0.1	0.12	0.17	0.18	0.17	0.21	0.15	0.27	0.26	0.09	0.08	0.14	0.13	0.73	0.59	0.12	0.07	0.17	0.19	0.13	0.08	0.19	0.1	0.1	0.1	0.13	0.15	0.09	0.11	0.16	0.19	0.16	0.14	0.18	0.14
chrXVI:582702:582902:-@chrXVI:582358:582558:-	0.07	0.08	0.06	0.07	0.05	0.06	0.06	0.15	-1	0.05	0.05	0.09	-1	0.08	0.05	0.27	0.24	-1	0.09	-1	-1	-1	-1	0.05	0.04	-1	-1	-1	-1	-1	-1	0.04	0.08	-1	-1	0.12	-1
chrXVI:623377:623577:+@chrXVI:623711:623911:+	0.95	0.97	0.91	0.87	0.71	0.72	0.77	-1	-1	0.74	-1	-1	-1	0.69	0.4	0.96	0.94	-1	0.85	0.92	0.91	0.94	0.87	-1	-1	0.93	0.95	-1	0.9	-1	-1	-1	0.41	0.87	0.87	0.89	0.88
chrXVI:653967:654167:+@chrXVI:654571:654771:+	0.08	0.08	0.05	0.06	0.06	0.06	0.07	0.11	0.11	0.06	0.06	0.05	0.05	0.1	0.1	0.57	0.58	0.06	0.07	0.08	0.09	0.08	0.07	0.09	0.08	0.09	0.08	0.09	0.1	0.06	0.07	0.07	0.05	0.1	0.09	0.07	0.08
chrXVI:673548:673748:+@chrXVI:674377:674577:+	0.99	1	0.99	0.99	0.99	0.99	0.99	0.96	0.97	0.99	0.98	0.98	0.99	0.99	0.98	0.97	0.98	0.98	0.99	0.99	0.99	0.98	0.98	0.99	0.99	0.99	0.99	0.99	0.99	0.98	0.99	0.99	0.99	0.99	0.99	0.99	0.99
chrXVI:678280:678480:-@chrXVI:677993:678193:-	0.14	-1	-1	-1	0.13	0.21	0.18	-1	-1	-1	-1	-1	-1	0.25	0.18	0.62	0.52	-1	-1	-1	-1	-1	-1	-1	-1	-1	-1	-1	0.23	-1	-1	0.07	-1	-1	-1	-1	-1
chrXVI:717147:717347:-@chrXVI:716849:717049:-	0.98	0.96	0.96	0.96	0.96	0.96	0.97	0.97	0.92	0.92	0.94	0.94	-1	0.96	0.97	-1	0.88	0.97	0.93	0.91	0.92	-1	0.92	0.95	0.97	0.97	0.94	0.96	0.94	0.93	0.95	0.95	0.96	0.95	-1	0.92	0.93
chrXVI:833493:833693:+@chrXVI:833828:834028:+	-1	0.92	-1	-1	0.93	-1	-1	0.94	-1	-1	NA	NA	NA	-1	NA	0.92	-1	-1	-1	-1	-1	NA	NA	-1	-1	NA	-1	-1	-1	-1	-1	-1	-1	-1	NA	-1	NA
chrXVI:883187:883387:+@chrXVI:883487:883687:+	0.06	0.08	0.08	0.1	0.08	0.08	0.08	0.11	0.17	0.07	0.07	0.04	0.06	0.05	0.07	0.29	0.23	0.11	0.1	-1	-1	-1	-1	-1	-1	-1	-1	0.11	0.12	-1	0.07	0.09	0.1	0.09	-1	0.05	-1
chrXVI:911076:911276:+@chrXVI:911353:911553:+	0.08	0.09	-1	-1	-1	-1	0.07	-1	-1	-1	-1	-1	-1	-1	-1	-1	-1	-1	-1	-1	-1	-1	-1	-1	-1	-1	-1	-1	-1	-1	-1	-1	-1	-1	-1	0.14	-1
chrXVI:96234:96434:-@chrXVI:95953:96153:-	0.93	-1	-1	-1	-1	0.92	0.88	-1	-1	-1	-1	-1	-1	-1	-1	-1	-1	-1	-1	-1	-1	-1	-1	-1	-1	-1	0.92	-1	-1	-1	-1	0.93	0.95	-1	-1	-1	-1
