# Supplementary material
Source: HighWire-hosted journal article supplement (doi:10.1101/rna.057216.116)
Supplement: Supplemental_TableS8.xlsx [file Supplemental_TableS8.xlsx]

## Sheet: table_x1_y0_n20_ciRange0.5.filt
Table S8. Figure 6A event annotations
Splicing events	Annotation (1=Yes,0=No)
chrXII:982539:982739:-@chrXII:982258:982458:-	0
chrXVI:717147:717347:-@chrXVI:716849:717049:-	0
chrXVI:883187:883387:+@chrXVI:883487:883687:+	1
chrXIV:414711:414911:+@chrXIV:415914:416114:+	1
chrVII:365433:365633:-@chrVII:364764:364964:-	1
chrX:387436:387636:-@chrX:387148:387348:-	1
chrIX:127461:127661:+@chrIX:128149:128349:+	1
chrII:45444:45644:+@chrII:45978:46178:+	1
chrVII:438398:438598:-@chrVII:437741:437941:-	1
chrIX:232367:232567:-@chrIX:231757:231957:-	1
chrXVI:623377:623577:+@chrXVI:623711:623911:+	1
chrXII:766130:766330:-@chrXII:765873:766073:-	1
chrIV:117466:117666:+@chrIV:118158:118358:+	1
chrIV:569724:569924:-@chrIV:569433:569633:-	1
chrV:306125:306325:+@chrV:306792:306992:+	1
chrXVI:218446:218646:+@chrXVI:218747:218947:+	1
chrXIV:350757:350957:+@chrXIV:351054:351254:+	1
chrVI:64921:65121:-@chrVI:64153:64353:-	0
chrIV:417627:417827:-@chrIV:417021:417221:-	0
chrXVI:345597:345797:-@chrXVI:345244:345444:-	1
chrXII:286557:286757:-@chrXII:286267:286467:-	1
chrXI:166199:166399:+@chrXI:166488:166688:+	1
chrXVI:833493:833693:+@chrXVI:833828:834028:+	1
chrII:407123:407323:-@chrII:406827:407027:-	1
chrXIII:236391:236591:+@chrXIII:236954:237154:+	1
chrVII:543438:543638:+@chrVII:543722:543922:+	1
chrXII:233886:234086:-@chrXII:233442:233642:-	0
chrVIII:382748:382948:-@chrVIII:382106:382306:-	1
chrXIII:223782:223982:-@chrXIII:223180:223380:-	1
chrIV:229819:230019:+@chrIV:230321:230521:+	1
chrXII:694182:694382:+@chrXII:694473:694673:+	1
chrIV:491359:491559:+@chrIV:491899:492099:+	1
chrII:680040:680240:-@chrII:679742:679942:-	1
chrXIII:225691:225891:+@chrXIII:226290:226490:+	1
chrXIII:721346:721546:-@chrXIII:720998:721198:-	1
chrXII:40401:40601:-@chrXII:40021:40221:-	1
chrXVI:911076:911276:+@chrXVI:911353:911553:+	1
chrX:172753:172953:-@chrX:172232:172432:-	1
chrIX:99386:99586:-@chrIX:98895:99095:-	1
chrIX:257027:257227:-@chrIX:256354:256554:-	1
chrII:462229:462429:+@chrII:462500:462700:+	1
chrX:157250:157450:-@chrX:156589:156789:-	1
chrX:608282:608482:+@chrX:608582:608782:+	0
chrXII:796336:796536:-@chrXII:795712:795912:-	1
chrVIII:107631:107831:+@chrVIII:107895:108095:+	1
chrX:396571:396771:-@chrX:396293:396493:-	1
chrXVI:653967:654167:+@chrXVI:654571:654771:+	1
chrXIV:545091:545291:+@chrXIV:545371:545571:+	1
chrV:432471:432671:+@chrV:433197:433397:+	1
chrII:342498:342698:+@chrII:342790:342990:+	0
chrVIII:354664:354864:+@chrVIII:354956:355156:+	1
chrVIII:103857:104057:-@chrVIII:103417:103617:-	0
chrVII:383285:383485:+@chrVII:383581:383781:+	0
chrXIV:273602:273802:-@chrXIV:272187:272387:-	0
chrXV:80160:80360:+@chrXV:80775:80975:+	1
chrI:87187:87387:+@chrI:87501:87701:+	1
chrIII:111634:111834:-@chrIII:111357:111557:-	1
chrXIV:728354:728554:+@chrXIV:728922:729122:+	0
chrIV:458098:458298:-@chrIV:457817:458017:-	1
chrVII:436112:436312:+@chrVII:436375:436575:+	0
chrXV:349599:349799:-@chrXV:349297:349497:-	0
chrXIII:559582:559782:+@chrXIII:560158:560358:+	0
chrXII:931699:931899:-@chrXII:931149:931349:-	1
chrVIII:250955:251155:+@chrVIII:251249:251449:+	1
chrIV:1103609:1103809:+@chrIV:1103893:1104093:+	1
chrXV:552875:553075:-@chrXV:552465:552665:-	1
chrVII:726838:727038:+@chrVII:727358:727558:+	1
chrXIII:754220:754420:-@chrXIII:753542:753742:-	1
chrXVI:582702:582902:-@chrXVI:582358:582558:-	1
chrV:396610:396810:+@chrV:397282:397482:+	1
chrIV:579278:579478:+@chrIV:580018:580218:+	1
chrIX:68515:68715:+@chrIX:69150:69350:+	1
chrV:307756:307956:+@chrV:308068:308268:+	1
chrXII:713156:713356:-@chrXII:712525:712725:-	1
chrVIII:129328:129528:+@chrVIII:129648:129848:+	1
chrVII:249686:249886:+@chrVII:250087:250287:+	1
chrVIII:104205:104405:+@chrVIII:104804:105004:+	1
chrVII:439181:439381:+@chrVII:439480:439680:+	0
chrVI:63974:64174:-@chrVI:63659:63859:-	1
chrXI:431834:432034:+@chrXI:432433:432633:+	1
chrXIII:124158:124358:-@chrXIII:123542:123742:-	1
chrXIII:140184:140384:-@chrXIII:139890:140090:-	1
chrIII:178214:178414:-@chrIII:177706:177906:-	1
chrXVI:115018:115218:+@chrXVI:115294:115494:+	1
chrIV:217402:217602:+@chrIV:218008:218208:+	1
chrIV:1319817:1320017:-@chrIV:1319520:1319720:-	1
chrIV:322082:322282:+@chrIV:322704:322904:+	1
chrVII:148967:149167:-@chrVII:148398:148598:-	1
chrXIII:163717:163917:-@chrXIII:163108:163308:-	1
chrVII:150526:150726:-@chrVII:149983:150183:-	1
chrIV:1236642:1236842:+@chrIV:1237609:1237809:+	1
chrIX:47498:47698:+@chrIX:47761:47961:+	1
chrXIII:854616:854816:+@chrXIII:854899:855099:+	1
chrXIII:500152:500352:-@chrXIII:499678:499878:-	1
chrXIV:615866:616066:+@chrXIV:616413:616613:+	0
chrV:348277:348477:-@chrV:348001:348201:-	1
chrXVI:404756:404956:+@chrXVI:405458:405658:+	1
chrXVI:378390:378590:-@chrXVI:377795:377995:-	1
chrXVI:305106:305306:+@chrXVI:305412:305612:+	1
chrXIV:48093:48293:+@chrXIV:48402:48602:+	1
chrXIII:650960:651160:+@chrXIII:651624:651824:+	1
chrV:166875:167075:-@chrV:166571:166771:-	1
chrII:89441:89641:-@chrII:88932:89132:-	1
chrXII:28835:29035:-@chrXII:28262:28462:-	0
chrXII:281629:281829:-@chrXII:281227:281427:-	0
chrII:124954:125154:+@chrII:125271:125471:+	1
chrXV:92831:93031:-@chrXV:92240:92440:-	1
chrIV:1212677:1212877:+@chrIV:1212979:1213179:+	1
chrXVI:96234:96434:-@chrXVI:95953:96153:-	1
chrXII:263005:263205:+@chrXII:263595:263795:+	1
chrXIV:722303:722503:-@chrXIV:721570:721770:-	1
chrII:592769:592969:-@chrII:592216:592416:-	1
chrVII:253249:253449:-@chrVII:252985:253185:-	0
chrX:90894:91094:+@chrX:91412:91612:+	1
chrXIII:558002:558202:-@chrXIII:557628:557828:-	0
chrVIII:126351:126551:+@chrVIII:127113:127313:+	1
chrXII:819130:819330:+@chrXII:819778:819978:+	1
chrXV:423735:423935:-@chrXV:423457:423657:-	0
chrIV:267525:267725:+@chrIV:267807:268007:+	1
chrXII:466255:466455:-@chrXII:456916:457116:-	0
chrIV:314337:314537:-@chrIV:313844:314044:-	1
chrX:365584:365784:+@chrX:365903:366103:+	1
chrXV:241026:241226:-@chrXV:240747:240947:-	1
chrIV:1319698:1319898:-@chrIV:1319417:1319617:-	1
chrI:142053:142253:+@chrI:142620:142820:+	1
chrIV:1450847:1451047:-@chrIV:1450257:1450457:-	1
chrII:332675:332875:+@chrII:333387:333587:+	1
chrVI:223772:223972:-@chrVI:223240:223440:-	1
chrVIII:187677:187877:-@chrVIII:187314:187514:-	1
chrX:703055:703255:-@chrX:702598:702798:-	1
chrIV:308227:308427:+@chrIV:308793:308993:+	1
chrIX:166234:166434:+@chrIX:166520:166720:+	1
chrIV:1355551:1355751:-@chrIV:1355036:1355236:-	1
chrX:75738:75938:+@chrX:76325:76525:+	1
chrII:606080:606280:+@chrII:606669:606869:+	1
chrXV:242505:242705:-@chrXV:242241:242441:-	1
chrXVI:281940:282140:+@chrXVI:282666:282866:+	1
chrX:435027:435227:+@chrX:435344:435544:+	1
chrXIII:337617:337817:+@chrXIII:337904:338104:+	1
chrXIII:732265:732465:+@chrXIII:732876:733076:+	1
chrX:50412:50612:-@chrX:50068:50268:-	1
chrXV:94291:94491:-@chrXV:93643:93843:-	1
chrXII:1028668:1028868:+@chrXII:1029253:1029453:+	1
chrIV:655003:655203:+@chrIV:655273:655473:+	0
chrXIV:64451:64651:-@chrXIV:63818:64018:-	1
chrXII:856374:856574:+@chrXII:857058:857258:+	1
chrXIII:205897:206097:+@chrXIII:206204:206404:+	1
chrVIII:255751:255951:-@chrVIII:255437:255637:-	1
chrVI:221415:221615:-@chrVI:221067:221267:-	1
chrXV:678791:678991:-@chrXV:678179:678379:-	1
chrXI:93466:93666:-@chrXI:93166:93366:-	0
chrIV:1406792:1406992:+@chrIV:1407232:1407432:+	0
chrXVI:172962:173162:+@chrXVI:173572:173772:+	1
chrV:270149:270349:-@chrV:269551:269751:-	1
chrIX:348495:348695:-@chrIX:348163:348363:-	1
chrV:159088:159288:-@chrV:158794:158994:-	1
chrIV:255045:255245:-@chrIV:254774:254974:-	1
chrVI:241809:242009:+@chrVI:242082:242282:+	1
chrXIII:652848:653048:-@chrXIII:652575:652775:-	1
chrII:462009:462209:+@chrII:462290:462490:+	1
chrXI:430597:430797:-@chrXI:430255:430455:-	1
chrII:479145:479345:+@chrII:479435:479635:+	1
chrIV:337324:337524:+@chrIV:337635:337835:+	1
chrXII:564514:564714:-@chrXII:564254:564454:-	1
chrVIII:298485:298685:-@chrVIII:298160:298360:-	1
chrXIII:99376:99576:-@chrXIII:99059:99259:-	1
chrXVI:271103:271303:+@chrXVI:271897:272097:+	0
chrII:415260:415460:-@chrII:414553:414753:-	1
chrII:47147:47347:-@chrII:46858:47058:-	1
chrXIV:622744:622944:+@chrXIV:623287:623487:+	1
chrIV:1266862:1267062:-@chrIV:1266569:1266769:-	1
chrX:649658:649858:-@chrX:649314:649514:-	0
chrII:186428:186628:-@chrII:186152:186352:-	1
chrVIII:138409:138609:-@chrVIII:138040:138240:-	1
chrIV:65106:65306:+@chrIV:65378:65578:+	1
chrXIII:82090:82290:+@chrXIII:82374:82574:+	1
chrXI:282895:283095:+@chrXI:283422:283622:+	1
chrXVI:173465:173665:+@chrXVI:174073:174273:+	1
chrXVI:673548:673748:+@chrXVI:674377:674577:+	0
chrXIII:914649:914849:-@chrXIII:914204:914404:-	0
chrX:469264:469464:-@chrX:468983:469183:-	1
chrV:307546:307746:+@chrV:307849:308049:+	1
chrIV:431473:431673:-@chrIV:431186:431386:-	1
chrXVI:678280:678480:-@chrXVI:677993:678193:-	1
chrXV:373699:373899:+@chrXV:374123:374323:+	0
chrXV:901194:901394:-@chrXV:900567:900767:-	1
chrXVI:244026:244226:-@chrXVI:243289:243489:-	0
chrVI:203387:203587:-@chrVI:203092:203292:-	1
chrVII:859474:859674:-@chrVII:859060:859260:-	1
