# Supplementary material
Source: HighWire-hosted journal article supplement (doi:10.1101/rna.057216.116)
Supplement: Supplemental_TableS9.xlsx [file Supplemental_TableS9.xlsx]

## Sheet: updated_psi_file_no_chrM_min50_
Table S9. Figure 6B PSI values
event	WT_1_polyA	WT_2_polyA	DBR1_1_polyA	DBR1_2_polyA	UPF1_2_polyA	UPF1_1_polyA	DBR1_1_riboZero	DBR1_2_riboZero	sk1_2_riboZero	RAPplus_1_riboZero	RAPminus_1_riboZero	t0_1_riboZero	t0_2_riboZero	t3_1_riboZero	t3_2_riboZero	t6_1_riboZero	t6_2_riboZero	t7.5_1_riboZero	t7.5_2_riboZero	t8.5_1_riboZero	t8.5_2_riboZero	t12_1_riboZero	t12_2_riboZero	RAPplus_2_riboZero	RAPminus_2_riboZero	sk1_1_riboZero
chrII:168400:168600:+@chrII:168809:169009:+@A5SS	1	1	1	1	1	1	1	1	1	0.99	1	1	1	1	1	1	1	NA	NA	NA	NA	0.98	NA	0.96	1	1
chrX:50119:50319:-@chrX:50412:50612:-@A3SS	0.99	0.99	0.99	0.99	0.99	0.99	0.97	0.97	0.89	0.95	0.95	0.95	0.88	0.96	0.97	0.94	0.97	0.9	0.89	0.94	0.94	0.92	0.84	0.98	0.93	0.94
chrV:396610:396810:+@chrV:397282:397482:+@annotated	0.06	0.05	0.08	0.07	0.09	0.08	0.97	0.97	0.03	0.16	0.05	0.16	0.28	0.04	0.13	0.09	0.09	0.1	0.09	0.12	0.23	0.14	0.13	0.24	0.07	0.03
chrXVI:173465:173665:+@chrXVI:174073:174273:+@annotated	0.03	0.03	0.06	0.07	0.04	0.03	0.32	0.42	0.04	0.08	0.04	0.07	0.1	0.04	0.09	0.14	0.11	NA	NA	NA	NA	0.22	0.15	0.18	0.06	0.05
chrIX:256354:256554:-@chrIX:257027:257227:-@annotated	0.06	0.05	0.08	0.06	0.07	0.08	1	1	0.03	0.22	0.05	0.13	0.18	0.06	0.18	0.16	0.16	0.21	0.31	0.4	0.68	0.3	0.39	0.45	0.08	0.03
chrII:691766:691966:+@chrII:692126:692334:+@novel	0.96	0.98	0.95	0.98	0.97	0.84	0.98	0.99	0.96	0.94	0.96	0.98	0.98	0.99	0.98	0.98	0.99	0.98	0.98	0.99	0.99	0.97	0.97	0.96	0.86	0.95
chrII:662381:662581:-@chrII:663003:663203:-@annotated	0.99	0.98	0.98	0.97	0.99	0.99	0.87	0.97	0.88	0.75	0.8	0.88	0.79	0.87	0.9	0.84	0.92	NA	0.66	0.47	NA	0.84	0.93	0.86	0.9	0.92
chrI:12287:12487:+@chrI:12776:12976:+@novel	0.97	0.98	0.98	0.97	0.99	0.99	0.96	0.99	0.73	0.99	0.98	0.23	0.17	0.28	0.25	0.35	0.28	0.25	0.28	0.27	0.21	0.18	0.2	0.99	0.97	0.7
chrXIII:23160:23360:-@chrXIII:23659:23859:-@annotated	0.05	0.12	0.06	0.11	0.1	0.08	0.86	0.93	0.09	0.1	0.08	0.22	0.15	0.08	0.08	0.08	0.06	0.27	0.23	0.37	0.38	0.69	0.38	0.12	0.12	0.16
chrXIV:5731:5931:-@chrXIV:6080:6280:-@annotated	0.74	0.57	0.61	0.69	0.47	0.54	0.82	0.92	0.42	0.4	0.7	NA	0.35	0.33	0.22	0.32	0.22	0.27	0.31	0.29	0.16	0.13	0.35	0.23	0.58	NA
chrIV:1329546:1329746:+@chrIV:1329837:1330073:+@novel	1	1	1	1	1	1	0.99	0.99	0.99	0.98	0.99	0.99	1	1	0.99	0.99	1	0.99	1	0.99	0.99	0.99	0.99	0.99	0.98	0.98
chrVI:109748:109948:-@chrVI:110033:110233:-@novel	0.94	NA	0.92	NA	0.92	0.91	NA	NA	NA	NA	NA	NA	NA	NA	NA	NA	NA	0.98	0.99	0.96	0.98	0.87	0.91	NA	NA	NA
chrIV:600831:601031:-@chrIV:601140:601340:-@novel	1	1	1	1	1	1	1	1	0.96	1	0.99	0.97	0.96	0.97	0.97	0.97	0.97	0.98	0.95	0.96	0.98	0.96	0.99	0.99	0.99	0.97
chrVII:383285:383485:+@chrVII:383581:383781:+@novel	0.96	0.98	0.85	0.88	0.95	0.94	0.96	0.89	0.94	NA	0.94	0.92	0.94	0.85	0.94	0.91	0.97	NA	NA	NA	NA	0.93	NA	NA	0.9	0.92
chrVII:310815:311015:+@chrVII:311527:311727:+@annotated	0.19	0.11	0.26	0.22	0.76	0.67	0.88	0.91	0.1	0.2	0.12	0.34	0.44	0.11	0.2	0.22	0.2	0.08	0.06	0.17	0.12	0.21	0.25	0.28	0.11	0.08
chrVIII:558415:558615:+@chrVIII:558715:558915:+@annotated	0.99	0.99	0.99	0.98	0.99	1	0.99	0.99	0.77	0.99	0.99	0.85	0.55	0.48	0.57	0.57	0.62	0.92	0.7	0.79	0.92	0.77	0.45	0.99	0.99	0.9
chrIV:601115:601315:+@chrIV:601471:601697:+@novel	1	1	1	1	1	1	1	1	1	1	1	1	1	1	1	1	1	1	1	1	1	1	1	1	1	1
chrXIII:223180:223380:-@chrXIII:223782:223982:-@annotated	0.05	0.04	0.06	0.06	0.07	0.06	1	1	0.05	0.21	0.07	0.12	0.17	0.04	0.09	0.07	0.05	NA	NA	NA	NA	0.2	0.15	0.31	0.09	0.05
chrXV:778659:778859:-@chrXV:779387:779587:-@annotated	0.15	0.11	0.16	0.15	0.18	0.14	0.98	0.98	0.24	0.6	0.37	0.67	0.85	0.26	0.36	0.35	0.37	0.19	0.21	0.17	0.46	0.55	0.49	0.6	0.21	0.14
chrXIII:123542:123742:-@chrXIII:124158:124358:-@annotated	0.08	0.05	0.07	0.08	0.12	0.1	0.95	0.94	0.04	0.24	0.08	0.31	0.38	0.06	0.35	0.2	0.16	NA	NA	NA	NA	0.25	0.2	0.39	0.09	0.03
chrXII:457763:457963:+@chrXII:467102:467441:+@novel	1	1	1	0.99	1	1	1	0.89	1	1	1	0.93	0.58	0.77	0.64	0.73	0.93	1	1	1	1	1	1	1	1	1
chrIV:229819:230019:+@chrIV:230321:230521:+@annotated	0.08	0.07	0.1	0.09	0.15	0.13	0.89	0.85	0.03	0.08	0.04	0.14	0.21	0.04	0.22	0.07	0.05	0.07	0.05	NA	0.18	0.31	0.2	0.11	0.05	0.04
chrXV:80160:80360:+@chrXV:80775:80975:+@annotated	0.05	0.04	0.08	0.1	0.07	0.07	0.95	0.96	0.07	0.27	0.09	0.14	0.23	0.05	0.12	0.08	0.07	0.12	0.05	NA	NA	0.3	0.16	0.29	0.12	0.07
chrXVI:75785:75985:-@chrXVI:76224:76424:-@annotated	0.05	0.05	0.08	0.11	0.09	0.08	0.97	0.98	0.09	0.21	0.09	0.15	0.24	0.06	0.09	0.1	0.05	NA	NA	NA	NA	NA	0.2	0.28	0.1	0.08
chrII:592216:592416:-@chrII:592769:592969:-@annotated	0.08	0.05	0.09	0.08	0.11	0.11	0.93	0.93	0.04	0.16	0.07	0.14	0.2	0.04	0.13	0.12	0.08	0.37	NA	NA	0.44	NA	0.39	0.21	0.08	0.06
chrIV:579278:579478:+@chrIV:580018:580218:+@annotated	0.18	0.1	0.23	0.17	0.5	0.46	1	1	0.06	0.37	0.1	0.31	0.32	0.05	0.08	0.1	0.08	0.4	0.65	0.65	0.54	0.37	0.42	0.68	0.12	0.08
chrIV:313844:314044:-@chrIV:314337:314537:-@annotated	0.48	0.25	0.8	0.69	0.45	0.48	0.98	0.98	0.33	NA	NA	0.24	0.23	0.17	0.19	0.16	0.22	0.22	0.09	0.21	0.22	0.27	0.26	NA	NA	NA
chrXIV:615866:616066:+@chrXIV:616413:616613:+@novel	0.98	0.96	0.99	0.99	0.99	0.99	0.98	0.98	0.94	0.97	0.94	0.78	0.67	0.86	0.86	0.92	0.85	0.85	0.8	0.94	0.96	0.86	0.8	0.97	0.96	0.96
chrII:604314:604514:+@chrII:604928:605131:+@annotated	0.14	0.19	0.15	0.26	0.19	0.17	0.94	0.96	0.24	0.35	0.21	0.29	0.46	0.14	0.33	0.18	0.11	0.3	0.16	NA	0.32	0.32	0.25	0.39	0.09	0.07
chrX:90894:91094:+@chrX:91412:91612:+@annotated	0.06	0.05	0.07	0.08	0.08	0.07	0.96	0.95	0.05	0.12	0.05	0.08	0.14	0.05	0.11	0.07	0.05	0.06	0.05	NA	NA	0.08	0.07	0.15	0.06	0.04
chrIV:121877:122077:+@chrIV:122168:122402:+@novel	0.87	0.81	0.89	0.97	0.94	0.89	0.8	0.69	0.88	0.68	0.88	NA	NA	0.76	NA	0.93	0.94	NA	0.93	NA	NA	0.94	0.92	0.9	0.93	0.95
chrXIII:652575:652775:-@chrXIII:652848:653048:-@annotated	0.63	0.61	0.57	0.62	0.79	0.63	0.5	0.51	0.59	0.39	0.61	0.26	0.25	0.35	NA	0.41	0.44	NA	NA	NA	0.49	0.55	0.47	0.59	0.57	0.42
chrVII:497165:497365:-@chrVII:498000:498200:-@A5SS	1	1	1	1	1	1	1	1	1	1	1	0.99	0.99	1	0.99	0.99	0.99	0.99	0.99	0.99	0.99	0.99	0.99	1	1	1
chrXII:786415:786615:+@chrXII:786713:786913:+@annotated	0.83	0.96	0.85	0.92	0.95	0.97	NA	NA	NA	NA	NA	NA	NA	0.28	0.24	0.19	0.28	0.84	0.83	0.77	0.92	0.93	NA	0.91	NA	NA
chrX:608106:608306:+@chrX:608582:608782:+@annotated	0.07	0.03	0.11	0.14	0.11	0.08	1	1	0.06	0.25	0.09	0.27	0.32	0.11	0.47	0.18	0.18	0.39	NA	NA	NA	0.4	0.44	0.37	0.13	0.08
chrV:4122:4322:-@chrV:4602:4802:-@annotated	0.97	0.98	0.97	0.96	0.98	0.97	1	1	0.83	0.97	0.93	0.73	0.64	0.81	0.86	0.82	0.91	0.83	0.96	0.98	0.92	0.98	0.98	0.98	0.97	0.95
chrXIV:272187:272387:-@chrXIV:273602:273802:-@novel	0.95	1	0.98	0.99	0.99	0.98	0.93	0.86	0.79	0.98	0.88	0.87	0.7	0.88	0.9	0.62	0.64	0.5	0.39	0.54	0.62	0.97	0.98	0.95	0.94	0.9
chrXV:30912:31112:+@chrXV:31215:31415:+@novel	0.97	0.99	0.98	0.98	0.98	0.97	0.99	0.99	1	1	1	1	1	1	1	1	1	1	1	1	1	1	1	1	0.99	0.99
chrVII:346608:346808:-@chrVII:346894:347094:-@annotated	0.14	0.17	NA	0.21	0.17	0.24	0.27	0.33	NA	0.24	NA	NA	NA	NA	NA	NA	NA	NA	NA	NA	NA	0.83	0.77	NA	NA	NA
chrXV:505737:505937:+@chrXV:506339:506539:+@annotated	0.04	0.03	0.05	0.04	0.05	0.05	0.99	0.99	0.05	0.22	0.07	0.27	0.35	0.05	0.18	0.1	0.1	0.14	NA	NA	NA	0.27	0.19	0.3	0.07	0.05
chrVIII:126351:126551:+@chrVIII:127113:127313:+@annotated	0.08	0.03	0.09	0.06	0.1	0.08	0.93	0.94	0.03	0.24	0.05	0.14	0.15	0.02	0.09	0.05	0.07	0.12	0.08	NA	NA	0.24	0.17	0.58	0.09	0.03
chrXII:456916:457116:-@chrXII:466255:467636:-@novel	0.99	0.98	0.98	0.99	1	1	1	0.83	1	1	1	1	1	1	1	1	1	1	1	1	1	1	1	1	1	1
chrIV:569433:569633:-@chrIV:569724:569924:-@annotated	0.47	0.48	0.39	0.52	0.6	0.63	0.36	0.33	NA	0.3	NA	0.21	0.14	0.16	0.13	0.17	0.19	0.19	0.15	0.2	0.19	0.21	0.2	0.3	0.39	NA
chrIV:306605:306805:-@chrIV:307766:307966:-@A3SS	1	1	1	1	1	1	1	1	1	1	1	1	1	1	0.99	0.99	1	0.99	0.98	0.97	0.98	0.98	0.98	1	1	1
chrXI:449751:449951:-@chrXI:450021:450221:-@annotated	NA	NA	0.9	0.94	NA	0.94	0.91	NA	NA	NA	NA	NA	NA	0.17	0.13	0.11	0.15	0.17	0.15	0.28	0.26	0.45	0.55	NA	NA	NA
chrXV:900567:900767:-@chrXV:901194:901394:-@annotated	0.09	0.07	0.15	0.24	0.14	0.13	1	1	0.06	0.24	0.09	0.24	0.34	0.05	0.23	0.14	0.22	0.17	0.32	0.22	NA	0.16	0.24	0.36	0.13	0.07
chrXI:155071:155271:+@chrXI:155655:155855:+@annotated	0.56	0.72	0.79	0.48	0.5	0.46	1	1	0.53	0.63	0.51	0.58	0.52	0.67	0.84	0.65	0.71	0.99	0.99	0.93	0.88	0.86	0.84	0.59	0.52	0.59
chrIV:60278:60478:-@chrIV:61788:61988:-@novel	0.5	0.95	0.7	0.5	0.43	0.51	0.78	0.92	0.69	0.96	0.8	0.94	0.92	0.48	0.35	0.39	0.39	0.35	0.34	0.5	0.45	0.96	0.97	0.73	0.65	0.69
chrXII:454063:454263:+@chrXII:463402:467441:+@novel	0.74	0.64	0.7	0.82	0.71	0.73	1	0.77	1	1	1	1	1	1	1	1	1	1	1	1	1	1	1	1	1	1
chrXVI:406446:406646:+@chrXVI:407068:407268:+@annotated	0.07	0.07	0.08	0.1	0.09	0.08	0.95	0.95	0.08	0.1	0.08	0.13	0.22	0.06	0.18	0.09	0.13	NA	0.15	NA	NA	0.34	NA	0.28	0.07	0.05
chrIX:390479:390679:+@chrIX:390812:391012:+@novel	0.97	0.94	0.93	0.94	0.97	0.98	NA	NA	0.98	NA	NA	1	1	1	1	1	0.99	0.96	0.99	0.98	0.97	0.98	0.99	NA	NA	0.97
chrIX:68515:68715:+@chrIX:69150:69350:+@annotated	0.08	0.07	0.1	0.1	0.1	0.09	1	1	0.06	0.12	0.08	0.1	0.1	0.06	0.12	0.07	0.07	0.08	0.12	0.11	0.09	0.17	0.19	0.17	0.1	0.07
chrVII:946127:946327:+@chrVII:946421:946621:+@annotated	NA	NA	NA	NA	NA	0.95	NA	NA	NA	NA	NA	NA	NA	0.32	0.27	0.19	0.3	0.36	0.34	0.37	0.37	0.19	0.23	NA	NA	NA
chrVIII:315571:315771:-@chrVIII:315859:316059:-@annotated	NA	0.18	0.21	0.35	0.29	0.26	NA	NA	NA	NA	NA	NA	NA	NA	NA	NA	0.22	0.23	0.19	0.18	0.21	NA	NA	NA	NA	NA
chrII:479145:479345:+@chrII:479435:479635:+@annotated	0.37	0.26	0.39	0.36	0.29	0.43	NA	NA	NA	NA	NA	NA	NA	NA	NA	0.35	NA	NA	NA	NA	NA	0.93	NA	NA	NA	NA
chrV:362712:362912:+@chrV:363093:363293:+@novel	0.14	0.12	0.18	0.21	0.2	0.2	1	1	0.13	0.37	0.14	0.19	0.27	0.11	0.3	0.1	0.13	NA	NA	NA	NA	0.2	NA	0.62	0.19	0.14
chrIV:65106:65306:+@chrIV:65378:65578:+@annotated	0.32	0.37	0.23	0.22	0.29	0.17	0.44	0.58	0.54	0.34	0.74	NA	NA	0.61	0.4	0.57	0.33	NA	NA	NA	NA	0.97	0.95	NA	0.17	NA
chrXVI:281940:282140:+@chrXVI:282666:282866:+@annotated	0.03	0.02	0.03	0.03	0.04	0.04	0.99	0.99	0.03	0.13	0.04	0.17	0.25	0.03	0.12	0.17	0.12	0.19	0.11	0.11	0.3	0.24	0.28	0.25	0.05	0.03
chrV:147994:148194:+@chrV:148283:148483:+@annotated	0.69	0.83	0.98	0.94	0.98	0.99	0.72	0.59	0.55	0.68	0.55	0.5	0.44	0.47	0.6	0.44	0.53	0.91	0.88	0.73	0.87	0.88	0.46	0.83	0.81	0.74
chrIV:1506858:1507058:-@chrIV:1507315:1507515:-@annotated	0.94	0.97	0.94	0.95	0.97	0.97	0.84	NA	0.73	0.92	NA	0.93	0.97	0.95	0.91	0.92	0.95	0.9	0.91	0.96	0.96	0.99	0.99	NA	NA	0.83
chrXV:242241:242441:-@chrXV:242505:242705:-@annotated	0.95	0.81	0.88	0.93	0.91	0.96	NA	NA	NA	0.57	NA	NA	NA	0.65	NA	0.23	0.2	0.22	0.19	0.31	0.32	0.69	0.75	0.81	NA	NA
chrIV:1450257:1450457:-@chrIV:1450847:1451047:-@annotated	0.05	0.03	0.07	0.12	0.08	0.07	0.79	0.8	0.04	0.13	0.05	0.13	0.22	0.03	0.07	0.08	0.05	0.05	0.11	0.02	0.05	0.35	0.29	0.18	0.06	0.04
chrIV:337324:337524:+@chrIV:337635:337835:+@annotated	0.18	0.18	0.26	0.19	0.2	0.2	0.23	0.33	0.22	NA	0.25	NA	0.76	0.22	0.2	0.37	0.27	0.15	0.17	0.09	0.1	0.36	0.29	0.35	0.22	0.27
chrII:170420:170620:+@chrII:170805:171005:+@A5SS	1	0.99	1	0.99	1	1	0.98	0.99	0.97	0.94	0.98	0.97	0.97	0.99	0.97	0.97	0.99	0.98	0.99	0.99	0.99	0.99	0.98	0.98	0.97	0.97
chrXII:1066884:1067084:+@chrXII:1067364:1067564:+@annotated	0.78	0.81	0.86	0.88	0.9	0.84	0.99	0.99	0.69	0.94	0.79	0.57	0.5	0.62	0.63	0.57	0.65	0.66	0.91	0.8	0.67	0.81	0.89	0.96	0.97	0.65
chrI:128321:128521:-@chrI:129022:129222:-@novel	0.97	0.98	0.98	0.96	0.98	0.96	0.99	0.99	1	0.99	0.99	0.99	1	1	0.99	0.98	0.99	0.98	1	0.99	0.99	1	1	0.98	0.97	0.99
chrVIII:147916:148116:-@chrVIII:148667:148867:-@annotated	0.55	0.42	0.63	0.48	0.64	0.58	1	1	0.38	0.83	0.75	0.78	0.9	0.48	0.79	0.59	0.49	NA	NA	NA	NA	NA	NA	0.96	0.84	0.43
chrXIV:494122:494322:-@chrXIV:494974:495174:-@A3SS	1	1	1	1	1	1	1	1	1	1	1	1	1	1	1	1	1	0.99	0.99	NA	NA	0.99	0.98	1	1	1
chrVIII:505047:505247:-@chrVIII:505517:505717:-@annotated	0.03	0.02	0.07	0.43	0.05	0.05	0.96	0.96	0.04	0.2	0.05	0.23	0.27	0.04	0.25	0.1	0.13	0.18	0.17	NA	NA	0.36	0.33	0.36	0.07	0.05
chrXVI:445302:445502:-@chrXVI:445577:445777:-@novel	0.89	0.91	NA	NA	0.87	0.89	NA	NA	NA	NA	NA	NA	0.18	NA	NA	0.12	0.06	NA	NA	NA	NA	0.33	0.22	NA	NA	NA
chrX:387148:387348:-@chrX:387436:387636:-@annotated	0.7	0.72	0.61	0.69	0.88	0.52	NA	NA	NA	NA	NA	NA	0.89	NA	NA	0.38	0.26	NA	NA	NA	NA	0.79	NA	NA	NA	NA
chrX:468983:469183:-@chrX:469264:469606:-@annotated	0.92	0.99	0.99	0.99	0.99	0.99	0.96	0.98	0.78	0.91	0.92	0.91	0.92	0.71	0.73	0.71	0.78	0.76	0.74	0.64	0.57	0.8	0.82	0.79	0.85	0.88
chrII:168224:168424:+@chrII:168809:169009:+@annotated	0.04	0.04	0.06	0.06	0.07	0.07	0.98	0.98	0.02	0.12	0.03	0.08	0.09	0.01	0.07	0.04	0.03	NA	NA	NA	NA	0.18	NA	0.29	0.04	0.03
chrIV:121877:122077:+@chrIV:122195:122402:+@novel	0.97	0.93	0.97	0.9	0.9	0.9	0.95	0.85	0.76	0.91	0.89	0.88	0.79	0.9	NA	NA	0.72	NA	NA	NA	NA	0.89	NA	0.87	0.96	0.64
chrVIII:498519:498719:-@chrVIII:498787:498987:-@annotated	0.51	0.58	0.54	0.68	0.3	0.26	0.86	0.9	NA	0.56	NA	NA	NA	NA	NA	0.33	0.51	NA	NA	NA	NA	0.97	0.86	NA	NA	NA
chrXIV:331125:331325:+@chrXIV:331838:332038:+@annotated	0.07	0.05	0.1	0.08	0.15	0.15	0.98	0.98	0.04	0.21	0.08	0.16	0.18	0.05	0.11	0.08	0.05	0.05	NA	NA	NA	0.3	0.2	0.22	0.09	0.04
chrII:342498:342698:+@chrII:342790:342990:+@novel	0.9	0.9	0.94	0.97	0.95	0.97	NA	NA	NA	0.91	NA	0.48	0.66	NA	NA	0.91	0.96	0.96	0.71	0.89	0.96	NA	NA	NA	NA	NA
chrII:59949:60149:-@chrII:60698:60898:-@A3SS	1	1	1	1	1	1	1	1	1	0.99	1	0.99	0.99	0.99	0.97	0.98	0.99	0.96	0.97	0.95	0.92	0.98	0.98	0.98	1	1
chrII:462009:462209:+@chrII:462290:462490:+@annotated	0.81	0.89	0.71	0.96	0.96	0.95	0.73	0.72	0.61	0.58	NA	0.67	NA	0.76	NA	NA	NA	NA	NA	NA	NA	0.92	0.86	NA	0.83	NA
chrVII:497165:497365:-@chrVII:497459:498200:-@annotated	0.89	0.67	0.67	0.71	0.64	0.68	0.99	0.99	0.98	0.99	0.98	0.96	0.99	0.98	0.87	0.96	0.97	0.9	0.96	0.81	0.66	0.91	0.76	0.8	0.96	0.89
chrXI:430255:430455:-@chrXI:430597:430797:-@annotated	0.5	0.38	0.57	0.51	0.59	0.63	0.7	0.7	0.44	0.5	0.78	0.57	0.52	0.45	0.28	0.35	0.33	0.62	NA	NA	NA	0.59	0.52	0.74	0.66	0.49
chrXVI:138525:138725:+@chrXVI:138865:139069:+@annotated	0.16	0.23	0.23	0.24	0.26	0.25	0.2	0.16	0.19	0.22	0.23	0.25	0.16	0.24	0.29	0.28	0.26	0.18	NA	0.34	NA	0.4	0.41	0.27	0.28	0.24
chrXII:788913:789113:-@chrXII:789219:789419:-@novel	1	1	1	1	1	1	0.98	0.97	0.47	0.99	0.98	0.72	0.53	0.58	0.57	0.62	0.52	0.64	0.62	0.63	0.81	NA	NA	0.98	0.99	0.67
chrX:503570:503770:+@chrX:503982:504182:+@novel	0.83	0.97	0.8	0.91	0.73	0.94	0.94	0.92	NA	0.98	0.92	0.94	0.96	0.99	0.99	0.99	0.99	0.98	1	0.99	0.98	0.98	0.98	0.96	NA	NA
chrIX:47498:47698:+@chrIX:47761:47965:+@annotated	0.58	0.61	0.49	0.64	0.68	0.66	0.46	0.38	0.48	0.34	0.33	0.27	0.29	0.3	0.25	0.38	0.29	0.5	0.48	0.4	0.3	NA	0.39	0.33	0.36	0.59
chrXIII:537248:537448:+@chrXIII:537565:537765:+@annotated	NA	NA	NA	NA	NA	0.6	NA	NA	NA	NA	NA	NA	NA	0.23	0.25	0.24	0.25	NA	NA	NA	NA	0.75	0.77	NA	NA	NA
chrXIII:550601:550801:-@chrXIII:551204:551404:-@annotated	0.12	0.1	0.15	0.17	0.22	0.19	1	1	0.07	0.21	0.1	0.22	0.22	0.09	0.13	0.11	0.12	NA	NA	NA	NA	0.36	0.21	0.46	0.16	0.09
chrXII:819130:819330:+@chrXII:819778:819978:+@annotated	0.08	0.06	0.1	0.08	0.1	0.09	1	1	0.08	0.18	0.09	0.19	0.32	0.08	0.16	0.11	0.11	0.17	0.06	0.17	NA	0.18	0.24	0.26	0.17	0.1
chrVI:64399:64599:-@chrVI:64921:65121:-@annotated	0.96	0.57	0.99	0.96	1	1	1	1	0.66	0.96	0.94	1	0.99	0.54	0.94	0.96	0.98	0.86	0.94	0.87	0.9	0.98	0.98	0.93	0.88	0.55
chrIV:1319520:1319720:-@chrIV:1319817:1320017:-@annotated	0.3	0.43	0.63	0.54	0.55	0.32	0.41	0.6	NA	0.29	NA	NA	NA	0.22	NA	0.33	0.34	NA	NA	NA	NA	NA	NA	NA	NA	NA
chrIV:733502:733702:-@chrIV:733776:733976:-@annotated	0.23	0.29	0.3	0.31	0.39	0.37	0.34	0.35	0.22	0.27	0.27	0.27	0.27	0.28	0.47	0.61	0.51	0.57	0.57	0.48	0.38	0.73	0.54	0.27	0.32	0.25
chrVII:61931:62131:+@chrVII:62184:62415:+@A3SS	0.99	0.99	0.99	0.99	0.98	0.98	0.98	0.97	0.99	0.96	0.98	0.97	0.95	0.96	0.94	0.93	0.97	NA	0.92	NA	NA	0.92	0.96	0.89	0.97	0.96
chrXIV:609590:609790:+@chrXIV:609875:610075:+@annotated	0.93	0.94	0.95	0.93	0.98	0.98	NA	NA	NA	0.92	NA	0.92	0.93	0.39	0.38	0.31	0.42	0.32	0.35	0.31	0.32	0.89	0.92	0.9	NA	NA
chrVIII:255437:255637:-@chrVIII:255751:255951:-@annotated	NA	NA	NA	0.42	NA	NA	0.88	0.84	0.9	NA	NA	0.49	0.96	NA	NA	NA	0.3	NA	0.37	NA	NA	0.47	0.34	NA	NA	0.89
chrIX:348163:348363:-@chrIX:348495:348695:-@annotated	0.21	0.19	0.23	0.24	0.3	0.35	0.28	0.24	0.33	0.3	0.4	0.29	0.35	0.4	0.46	0.54	0.55	NA	NA	NA	NA	0.74	0.81	0.35	0.37	0.37
chrVII:72788:72988:-@chrVII:73138:73338:-@annotated	0.21	0.18	0.24	0.24	0.19	0.22	0.43	0.42	0.28	0.2	0.23	0.22	0.22	0.29	NA	0.31	0.3	0.4	NA	NA	NA	0.83	NA	NA	NA	0.29
chrXIV:545091:545291:+@chrXIV:545371:545571:+@annotated	0.21	0.42	0.32	0.4	0.42	0.42	0.33	0.42	0.21	0.35	0.36	0.32	0.51	0.17	0.21	0.34	0.3	0.29	0.22	0.2	0.2	0.53	0.5	0.55	0.35	0.18
chrII:59989:60189:-@chrII:60698:60898:-@A3SS	1	1	1	1	1	1	1	1	1	0.99	1	0.99	0.98	0.99	0.98	0.97	0.98	0.95	0.95	0.93	0.92	0.97	0.97	0.98	1	1
chrIII:293739:293939:+@chrIII:293994:294194:+@annotated	NA	NA	NA	NA	NA	NA	NA	NA	NA	NA	NA	NA	NA	NA	NA	NA	0.2	NA	NA	NA	NA	NA	NA	NA	NA	NA
chrXIV:426903:427103:+@chrXIV:427193:427393:+@novel	0.95	0.99	0.98	0.99	0.97	0.97	0.99	0.99	0.98	0.96	0.98	0.97	0.98	0.98	0.97	0.97	0.97	0.88	NA	0.94	NA	0.97	0.99	0.93	0.92	0.98
chrXII:242121:242321:+@chrXII:242681:243363:+@annotated	0.78	0.77	0.79	0.79	0.77	0.78	0.92	0.91	0.79	0.78	0.77	0.81	0.76	0.87	0.84	0.79	0.86	0.92	0.95	0.9	0.89	0.96	0.93	0.89	0.82	0.82
chrXI:282895:283095:+@chrXI:283422:283622:+@annotated	0.01	0.03	0.03	0.05	0.02	0.02	0.98	0.98	0.05	0.09	0.05	0.15	0.18	0.09	0.26	0.11	0.12	0.29	0.23	0.26	0.39	0.3	0.19	0.14	0.05	0.06
chrXIII:854616:854816:+@chrXIII:854899:855099:+@annotated	0.15	0.18	0.22	0.21	0.23	0.2	0.27	0.28	0.15	0.21	0.22	0.25	NA	0.25	0.04	0.13	0.08	0.86	0.83	0.37	0.43	0.56	0.37	0.17	0.16	0.14
chrII:110679:110879:+@chrII:110949:111149:+@annotated	0.76	0.76	0.9	0.84	0.97	0.96	0.82	0.66	0.83	NA	0.79	0.84	0.67	0.53	NA	0.47	0.49	NA	0.46	NA	0.48	0.98	0.96	NA	NA	0.89
chrIV:1238430:1238630:-@chrIV:1238825:1239025:-@annotated	0.99	1	0.98	0.99	0.99	0.99	0.87	0.91	0.8	0.8	0.96	0.92	0.88	0.8	0.92	0.8	0.63	NA	0.8	0.82	0.57	0.96	0.91	0.55	0.78	0.5
chrII:142549:142749:-@chrII:142847:143047:-@annotated	0.16	0.14	0.2	0.23	0.26	0.27	0.42	0.41	0.62	0.29	0.48	0.41	0.37	0.31	0.18	0.32	0.39	NA	NA	NA	NA	0.51	0.36	0.27	0.24	0.38
chrIV:451211:451411:-@chrIV:451491:451691:-@novel	0.99	0.99	0.99	0.99	0.99	1	0.99	0.99	0.98	0.99	0.99	1	0.98	1	1	0.99	1	0.99	0.99	0.99	0.99	0.99	0.97	1	0.99	0.98
chrXI:155213:155413:+@chrXI:155637:155855:+@novel	1	1	1	0.99	0.99	1	1	1	1	1	1	1	1	1	1	1	1	0.99	0.99	0.99	0.99	1	1	1	1	0.99
chrXIII:551751:551951:+@chrXIII:552496:552711:+@annotated	0.84	0.82	0.85	0.84	0.86	0.85	1	1	0.83	0.95	0.93	0.98	0.98	0.92	0.95	0.86	0.92	0.72	0.92	NA	0.94	0.9	0.88	0.83	0.88	0.78
chrXII:765981:766181:-@chrXII:766250:766450:-@annotated	0.83	0.63	0.92	0.89	0.77	0.69	0.88	NA	NA	NA	NA	NA	NA	NA	NA	NA	NA	NA	NA	NA	NA	NA	NA	NA	NA	NA
chrIV:117466:117666:+@chrIV:118158:118358:+@annotated	0.02	0.01	0.04	0.04	0.06	0.05	0.98	0.99	0.02	0.06	0.03	0.05	0.05	0.01	0.05	0.02	0.02	0.04	0.04	0.06	0.11	0.14	0.08	0.11	0.04	0.02
chrXIV:494324:494524:-@chrXIV:494974:495174:-@annotated	0.14	0.07	0.11	0.11	0.16	0.17	0.97	0.97	0.2	0.61	0.27	0.71	0.84	0.25	0.62	0.4	0.4	0.27	NA	NA	NA	0.56	0.49	0.69	0.26	0.16
chrXIII:205897:206097:+@chrXIII:206204:206404:+@annotated	0.39	0.19	0.35	0.3	0.21	0.25	0.59	0.68	0.47	0.53	0.46	NA	NA	NA	NA	NA	0.4	0.86	0.9	0.85	0.86	0.9	0.9	0.48	0.45	NA
chrXIV:414711:414911:+@chrXIV:415914:416114:+@annotated	0.02	0.03	0.03	0.03	0.03	0.05	0.55	0.69	0.15	0.49	0.16	0.35	0.33	0.07	0.19	0.27	0.29	0.42	0.5	0.79	0.89	0.26	0.3	0.68	0.18	0.13
chrIV:254774:254974:-@chrIV:255045:255245:-@annotated	0.95	0.94	0.89	0.98	0.99	0.98	0.95	0.96	0.94	0.84	0.91	0.69	0.81	0.7	0.58	0.68	0.39	0.43	0.62	0.52	0.47	0.94	0.81	NA	0.95	0.9
chrXII:453498:453698:-@chrXII:462837:467636:-@novel	0.94	0.96	0.95	0.98	0.99	0.99	1	0.98	1	1	1	1	1	1	1	1	1	1	1	1	1	1	1	1	1	1
chrXV:240747:240947:-@chrXV:241026:241226:-@annotated	NA	0.33	0.19	0.31	0.42	0.31	NA	NA	NA	NA	NA	NA	NA	0.08	0.07	0.07	0.08	0.35	0.21	0.26	0.27	0.23	0.19	0.16	NA	NA
chrXI:220577:220777:+@chrXI:220832:221032:+@novel	1	1	1	1	1	1	1	1	0.94	1	1	0.92	0.88	0.96	0.89	0.93	0.94	0.99	0.97	0.99	0.98	0.98	0.98	1	1	0.95
chrVIII:189549:189749:-@chrVIII:189851:190051:-@annotated	0.65	0.51	0.59	0.57	0.68	0.69	0.26	0.23	0.15	0.35	0.16	0.19	0.27	0.22	0.19	0.34	0.46	NA	NA	NA	NA	0.86	NA	0.57	0.24	0.28
chrVII:438893:439093:+@chrVII:439324:439524:+@annotated	0.55	0.46	0.54	0.5	0.59	0.58	0.93	1	0.39	NA	0.38	0.48	0.63	0.43	NA	NA	NA	0.87	NA	NA	NA	NA	NA	NA	0.43	0.28
chrVII:436112:436312:+@chrVII:436375:436575:+@novel	NA	NA	NA	NA	NA	NA	NA	NA	NA	NA	NA	NA	NA	0.09	0.15	0.19	0.19	NA	NA	NA	NA	NA	NA	NA	NA	NA
chrXI:82798:82998:+@chrXI:83075:83275:+@annotated	0.16	0.25	0.19	0.31	0.17	0.2	0.47	0.37	NA	0.2	0.24	NA	0.28	0.22	0.2	0.34	0.55	0.49	0.62	0.36	0.41	0.86	0.77	0.26	0.28	0.35
chrXIV:622744:622944:+@chrXIV:623287:623487:+@annotated	0.19	0.21	0.39	0.3	0.63	0.54	0.98	0.98	0.22	0.17	0.27	0.29	0.25	0.14	0.16	0.27	0.18	NA	NA	NA	NA	0.19	0.22	0.2	0.21	0.34
chrXVI:794829:795029:+@chrXVI:795378:795595:+@A3SS	0.9	0.9	0.93	0.93	0.93	0.92	1	1	0.95	0.99	0.97	0.99	0.99	0.95	0.99	0.96	0.97	0.98	0.98	0.98	0.96	0.98	0.97	0.99	0.95	0.94
chrXII:451857:452057:-@chrXII:461196:467636:-@novel	0.98	0.89	0.94	0.87	1	1	1	0.87	1	1	1	1	1	1	1	1	1	1	1	1	1	1	1	1	1	1
chrXIII:650960:651160:+@chrXIII:651624:651824:+@annotated	0.22	0.16	0.27	0.24	0.37	0.38	0.99	0.99	0.12	0.25	0.17	0.46	0.66	0.19	0.35	0.27	0.3	0.5	0.81	NA	0.34	0.76	0.76	0.37	0.23	0.12
chrV:183969:184169:-@chrV:184678:184878:-@annotated	0.7	0.67	0.76	0.72	0.97	0.97	0.62	0.81	0.56	0.46	0.41	0.86	0.95	0.96	0.97	0.78	0.77	0.6	0.37	0.54	0.55	0.77	0.79	0.68	0.57	0.47
chrX:4381:4581:-@chrX:4970:5170:-@annotated	0.97	0.94	0.97	0.95	0.99	0.98	0.99	0.99	0.84	0.95	0.9	0.88	0.86	0.92	0.96	0.96	0.97	0.94	0.98	0.99	0.97	0.99	0.99	0.97	0.94	0.95
chrXIV:380489:380689:-@chrXIV:380782:380982:-@annotated	0.23	0.27	0.27	0.29	0.23	0.3	0.33	0.3	0.3	0.32	0.18	0.37	0.44	0.26	0.17	0.3	0.26	0.18	0.21	NA	NA	0.87	0.37	0.23	0.29	0.28
chrXVI:345244:345444:-@chrXVI:345597:345797:-@annotated	0.43	0.39	0.36	0.58	0.59	0.52	0.5	0.38	0.38	0.29	0.45	0.13	0.17	0.18	0.2	0.19	0.16	0.37	NA	0.77	0.63	0.43	0.3	0.31	0.35	0.55
chrIV:239198:239398:-@chrIV:239510:239710:-@annotated	0.15	0.35	0.16	0.33	0.28	0.24	0.19	0.17	0.16	0.25	0.18	0.11	0.15	0.12	0.16	0.11	0.09	0.1	0.06	0.21	0.17	0.71	0.67	0.25	0.15	0.12
chrXVI:697763:697963:-@chrXVI:698315:698515:-@novel	0.94	0.96	0.95	0.97	0.98	0.97	0.89	0.88	NA	0.99	NA	NA	0.88	0.89	NA	0.96	0.95	1	0.86	1	1	1	1	0.99	0.92	NA
chrIII:106833:107033:+@chrIII:107111:107505:+@annotated	0.97	0.97	0.97	0.98	0.96	0.96	0.94	0.95	0.96	0.97	0.97	0.96	0.94	0.96	0.96	0.95	0.96	0.99	1	1	1	1	1	0.96	0.96	0.96
chrXII:765873:766073:-@chrXII:766130:766330:-@annotated	0.72	0.71	0.8	0.77	0.85	0.87	0.88	0.9	NA	0.9	NA	NA	NA	0.95	0.92	0.96	0.98	NA	NA	NA	NA	NA	NA	0.96	0.8	NA
chrXIV:185291:185491:+@chrXIV:185567:185787:+@A3SS	0.93	0.99	0.99	0.97	0.97	1	0.95	0.92	0.99	0.97	0.99	0.98	0.95	0.97	0.97	0.99	0.99	0.95	NA	NA	NA	0.98	0.98	0.95	0.99	0.99
chrXVI:653967:654167:+@chrXVI:654571:654771:+@annotated	0.07	0.04	0.09	0.07	0.11	0.1	0.98	0.98	0.03	0.15	0.05	0.14	0.19	0.02	0.14	0.07	0.05	0.08	0.06	NA	NA	0.24	0.1	0.3	0.07	0.03
chrIX:98895:99095:-@chrIX:99386:99586:-@annotated	0.09	0.05	0.1	0.16	0.14	0.13	1	1	0.08	0.48	0.15	0.32	0.56	0.1	0.42	0.23	0.22	NA	NA	NA	NA	0.5	0.28	0.47	0.16	0.08
chrVII:364764:364964:-@chrVII:365433:365633:-@annotated	0.03	0.03	0.05	0.06	0.05	0.04	1	1	0.04	0.14	0.05	0.15	0.18	0.05	0.15	0.06	0.06	0.09	0.06	NA	NA	0.14	0.07	0.21	0.07	0.04
chrIV:1073112:1073312:-@chrIV:1073402:1073602:-@annotated	0.56	0.36	0.67	0.3	0.67	0.55	0.83	0.72	0.67	0.89	NA	NA	0.7	0.63	NA	0.33	0.53	NA	0.35	NA	NA	0.97	0.86	0.94	0.9	0.85
chrX:580147:580347:+@chrX:581053:581253:+@annotated	1	1	1	1	1	1	0.99	0.99	0.99	0.99	0.99	1	0.99	0.99	0.99	0.99	1	0.95	0.96	0.57	0.59	0.99	0.99	0.99	0.99	0.99
chrX:570367:570567:-@chrX:570641:570841:-@novel	1	1	1	1	1	1	0.99	0.99	0.99	0.93	0.98	0.99	0.97	0.95	NA	0.97	0.97	NA	NA	NA	NA	0.98	0.98	0.89	0.98	0.99
chrXV:29475:29675:+@chrXV:30636:30836:+@novel	0.99	1	0.99	1	0.99	1	0.99	0.99	0.99	0.99	0.98	0.9	0.95	0.88	0.87	0.74	0.86	0.96	0.78	0.94	0.95	0.84	0.74	0.99	0.97	0.99
chrX:649314:649514:-@chrX:649658:649858:-@novel	0.74	0.48	0.39	0.56	0.95	0.79	NA	NA	0.66	NA	0.75	NA	NA	NA	NA	NA	NA	NA	NA	NA	NA	0.85	0.56	NA	NA	NA
chrII:653168:653368:+@chrII:653453:653725:+@annotated	0.9	0.97	0.97	0.97	0.97	0.97	0.97	0.97	0.93	0.97	0.91	0.88	0.75	0.8	0.86	0.95	0.92	0.91	0.88	NA	0.89	0.97	0.94	0.84	NA	0.88
chrXIII:236391:236591:+@chrXIII:236954:237154:+@annotated	0.18	0.55	0.49	0.86	0.29	0.29	0.59	0.68	0.25	0.17	0.14	0.15	0.14	0.07	0.12	0.11	0.1	0.11	0.06	0.09	0.12	NA	0.12	0.2	0.13	0.29
chrII:462229:462429:+@chrII:462500:462700:+@annotated	0.46	0.51	0.56	0.52	0.32	0.35	0.52	0.45	NA	0.47	0.6	NA	NA	NA	NA	NA	NA	NA	NA	NA	NA	NA	NA	0.44	NA	NA
chrXVI:942850:943050:+@chrXVI:943199:943399:+@annotated	0.98	0.91	0.91	0.85	0.88	0.88	0.97	0.99	0.96	0.95	0.97	0.73	0.97	0.99	0.97	0.96	0.95	0.94	0.97	0.98	0.93	0.87	0.96	0.61	0.97	0.83
chrXIII:211244:211444:+@chrXIII:211571:211771:+@annotated	0.2	0.26	0.32	0.22	0.22	0.29	NA	NA	NA	NA	NA	NA	NA	NA	NA	NA	NA	0.07	0.05	0.06	0.07	NA	NA	NA	NA	NA
chrXII:522469:522669:+@chrXII:523029:523229:+@annotated	0.06	0.03	0.07	0.13	0.09	0.07	0.92	0.94	0.04	0.26	0.07	0.27	0.4	0.05	0.35	0.23	0.21	0.22	0.22	0.14	0.24	0.22	0.17	0.29	0.08	0.04
chrV:432471:432671:+@chrV:433197:433397:+@annotated	0.05	0.1	0.07	0.14	0.05	0.05	1	1	0.19	0.1	0.14	0.09	0.11	0.06	0.06	0.06	0.06	0.06	0.04	0.06	0.06	0.08	0.07	0.1	0.13	0.15
chrXIV:350757:350957:+@chrXIV:351054:351254:+@annotated	0.23	0.23	0.36	0.35	0.31	0.25	0.29	0.38	0.2	NA	0.31	NA	NA	0.18	0.23	0.24	0.28	NA	NA	0.29	0.3	0.49	0.42	0.4	NA	0.34
chrXVI:656305:656505:-@chrXVI:656576:656776:-@novel	0.98	0.98	0.98	0.98	0.98	0.99	0.98	0.99	0.92	0.94	0.97	0.76	0.97	NA	0.9	0.88	0.83	0.89	0.88	NA	NA	NA	NA	0.94	0.96	NA
chrII:332675:332875:+@chrII:333387:333587:+@annotated	0.07	0.04	0.07	0.06	0.11	0.1	1	1	0.05	0.21	0.09	0.28	0.37	0.04	0.1	0.1	0.06	0.06	0.08	NA	NA	0.25	0.16	0.34	0.09	0.04
chrXIII:753542:753742:-@chrXIII:754220:754420:-@annotated	0.15	0.09	0.16	0.11	0.2	0.18	1	1	0.05	0.3	0.08	0.37	0.71	0.11	0.46	0.3	0.28	0.44	0.38	NA	NA	0.31	0.4	0.39	0.1	0.05
chrIV:340610:340810:-@chrIV:341184:341384:-@novel	0.06	0.05	0.09	0.09	0.15	0.14	1	1	0.04	0.14	0.07	0.15	0.16	0.04	0.17	0.09	0.06	NA	NA	NA	NA	0.14	NA	0.22	0.09	0.05
chrXVI:172962:173162:+@chrXVI:173572:173772:+@annotated	0.39	0.89	0.89	0.98	0.95	0.95	1	1	0.98	0.98	0.99	0.99	0.99	0.49	0.32	0.54	0.49	0.74	NA	NA	NA	0.92	0.35	0.97	0.98	0.97
chrIV:399161:399361:+@chrIV:399485:399696:+@annotated	0.58	0.56	0.55	0.51	0.6	0.56	0.43	0.37	0.56	0.51	0.48	0.37	0.55	0.45	0.52	0.52	0.37	NA	0.29	0.48	NA	0.32	0.28	0.54	0.64	0.54
chrXVI:677993:678193:-@chrXVI:678280:678480:-@annotated	0.22	0.21	0.25	0.26	0.28	0.27	0.29	0.27	0.26	0.22	0.22	0.32	0.26	0.22	0.31	0.23	0.23	0.24	0.26	0.24	0.44	0.37	0.33	0.19	0.17	0.25
chrXII:743953:744153:+@chrXII:744288:744488:+@annotated	0.29	0.5	0.78	0.76	0.49	0.56	0.9	0.73	NA	0.67	NA	NA	NA	0.73	NA	0.85	0.78	NA	NA	NA	NA	NA	NA	NA	NA	NA
chrVII:365309:365509:-@chrVII:365986:366186:-@A3SS	1	1	1	1	1	1	1	1	1	0.98	1	0.99	0.99	0.99	0.97	0.99	0.99	0.95	0.98	0.95	NA	NA	NA	0.97	1	1
chrIV:1266569:1266769:-@chrIV:1266862:1267062:-@annotated	0.54	0.34	0.48	0.4	0.47	0.49	0.65	0.63	0.91	0.68	0.71	0.54	0.81	0.39	0.28	0.47	0.29	NA	NA	NA	NA	0.95	0.97	0.7	0.72	0.73
chrVI:75639:75839:+@chrVI:76092:76292:+@annotated	1	1	1	1	1	1	1	0.99	0.84	1	0.99	0.89	0.62	0.84	0.91	0.95	0.98	1	0.97	0.99	1	0.99	0.96	1	1	1
chrXVI:412056:412256:+@chrXVI:412996:413213:+@novel	0.99	1	0.99	1	0.99	0.98	1	1	0.97	0.98	0.99	0.97	0.94	0.95	0.95	0.93	0.95	0.64	0.47	0.61	0.71	0.7	NA	0.99	0.98	0.98
chrIV:1236642:1236842:+@chrIV:1237609:1237809:+@annotated	0.35	0.43	0.41	0.35	0.42	0.36	0.97	0.97	0.22	0.47	0.21	0.33	0.33	0.14	0.18	0.29	0.3	0.39	0.31	0.24	0.28	0.19	0.17	0.66	0.27	0.34
chrVIII:250955:251155:+@chrVIII:251249:251449:+@annotated	0.91	0.95	0.84	0.86	0.93	0.91	0.95	0.9	0.92	0.48	0.93	0.86	0.84	0.88	0.92	0.85	0.93	0.9	0.54	0.86	0.92	0.92	0.86	0.64	0.91	0.87
chrII:115274:115474:+@chrII:115570:115770:+@novel	0.98	0.99	0.99	0.98	0.98	0.98	0.96	0.95	0.98	0.96	0.96	0.98	0.99	0.96	0.94	0.97	0.96	0.86	NA	NA	NA	0.95	0.93	0.92	0.91	0.97
chrVIII:187314:187514:-@chrVIII:187677:187877:-@annotated	0.08	0.06	0.13	0.09	0.14	0.13	0.08	0.09	0.07	0.06	0.05	0.1	0.13	0.1	0.11	0.15	0.1	NA	0.35	NA	NA	0.25	0.29	0.06	0.06	0.08
chrVIII:138040:138240:-@chrVIII:138409:138609:-@annotated	0.16	0.25	0.2	0.39	0.2	0.21	0.22	0.29	NA	0.09	NA	NA	0.22	0.2	0.17	0.14	0.13	0.41	0.72	NA	0.46	0.67	0.61	0.13	NA	NA
chrX:50068:50268:-@chrX:50412:50612:-@annotated	0.31	0.36	0.42	0.62	0.44	0.49	0.39	0.29	0.27	0.53	0.41	0.42	0.42	0.29	0.32	0.3	0.25	0.52	0.57	0.53	0.73	0.75	0.68	0.43	0.33	0.3
chrXI:109377:109577:+@chrXI:109884:110091:+@annotated	0.32	0.3	0.28	0.33	0.28	0.27	0.97	0.97	0.25	0.37	0.27	0.36	0.29	0.49	NA	0.48	0.5	0.4	0.55	NA	NA	0.71	0.74	0.35	0.39	0.33
chrVII:555630:555830:+@chrVII:556308:556508:+@annotated	0.07	0.05	0.99	0.99	0.1	0.09	1	1	0.06	0.23	0.07	0.21	0.32	0.06	0.14	0.11	0.12	0.19	0.21	0.33	0.32	0.22	0.55	0.46	0.1	0.07
chrXIV:365835:366035:+@chrXIV:366158:366358:+@annotated	0.48	0.66	0.72	0.91	0.72	0.89	0.7	0.79	0.43	0.83	0.79	0.94	0.94	0.76	0.7	0.63	0.88	NA	NA	NA	NA	0.9	0.92	0.83	NA	NA
chrXII:453164:453364:-@chrXII:462503:467636:-@novel	0.96	0.92	0.94	0.97	0.98	0.99	1	0.98	1	1	1	1	1	1	1	1	1	1	1	1	1	1	1	1	1	1
chrXI:158415:158615:+@chrXI:158967:159167:+@annotated	0.16	0.11	0.19	0.48	0.24	0.2	1	1	0.15	0.27	0.18	0.31	0.34	0.16	0.35	0.42	0.43	0.53	0.51	NA	0.45	0.43	0.57	0.6	0.26	0.18
chrII:168354:168554:+@chrII:168809:169009:+@A5SS	1	1	1	1	1	1	1	1	1	0.99	1	1	1	1	0.99	1	1	NA	NA	NA	NA	0.98	NA	0.98	1	1
chrVII:252985:253185:-@chrVII:253249:253449:-@novel	0.93	0.96	0.97	0.96	0.96	0.89	0.91	0.83	0.91	0.88	0.9	0.89	0.69	0.83	0.71	0.78	0.81	0.87	0.85	0.87	0.82	0.89	0.96	0.9	0.87	0.9
chrXI:431834:432034:+@chrXI:432433:432633:+@annotated	0.05	0.03	0.06	0.05	0.1	0.08	0.98	0.98	0.02	0.12	0.04	0.14	0.18	0.02	0.13	0.05	0.04	0.07	0.1	NA	NA	0.17	0.23	0.27	0.04	0.02
chrXIII:610607:610807:+@chrXIII:611037:611237:+@novel	0.93	0.99	0.97	0.98	0.99	0.99	0.86	0.93	0.89	0.97	0.89	0.44	0.33	0.58	0.64	0.77	0.85	0.46	0.46	0.74	0.64	0.23	0.21	0.97	0.93	NA
chrVIII:262154:262354:-@chrVIII:262441:262641:-@annotated	NA	0.91	NA	NA	NA	NA	NA	NA	NA	NA	NA	NA	NA	0.43	0.52	0.47	0.52	0.69	0.52	0.46	0.59	0.37	0.45	NA	NA	NA
chrII:46858:47058:-@chrII:47147:47347:-@annotated	0.88	0.82	0.96	0.93	0.97	0.97	0.54	0.84	0.51	0.4	0.78	NA	0.41	0.48	0.81	0.54	0.46	NA	NA	NA	NA	0.86	0.57	0.43	0.38	NA
chrV:306125:306325:+@chrV:306792:306992:+@annotated	0.06	0.04	0.07	0.06	0.13	0.1	0.94	0.94	0.02	0.13	0.04	0.12	0.19	0.03	0.1	0.07	0.05	0.15	0.1	NA	NA	0.14	0.13	0.21	0.05	0.03
chrXVI:404756:404956:+@chrXVI:405458:405658:+@annotated	0.12	0.42	0.51	1	0.37	0.35	1	1	0.24	0.96	0.27	0.93	0.95	0.74	0.9	0.76	0.82	0.89	0.76	0.84	0.51	0.75	0.59	0.95	0.32	0.43
chrXIII:99059:99259:-@chrXIII:99376:99576:-@annotated	0.11	0.11	0.11	0.13	0.15	0.12	0.16	0.21	0.16	0.13	0.16	0.17	0.11	0.13	0.17	0.12	0.18	0.22	0.17	0.24	0.21	0.42	NA	0.21	0.14	0.16
chrXIII:914204:914404:-@chrXIII:914649:914849:-@novel	1	0.99	0.99	0.99	0.99	1	0.99	0.99	0.98	0.98	0.99	1	1	0.99	0.97	0.98	0.99	0.99	0.99	0.99	0.99	0.98	0.98	0.99	0.99	0.97
chrXIII:225691:225891:+@chrXIII:226290:226490:+@annotated	0.04	0.04	0.06	0.06	0.07	0.06	0.86	0.89	0.04	0.1	0.05	0.11	0.14	0.05	0.07	0.05	0.07	0.06	0.05	NA	NA	0.13	0.1	0.14	0.06	0.05
chrXI:446951:447151:-@chrXI:447243:447443:-@novel	0.99	0.99	0.96	0.98	0.99	1	0.92	0.96	0.95	0.95	0.95	0.95	0.9	0.98	0.97	0.98	0.99	0.98	0.99	0.99	0.99	0.98	0.98	0.95	0.96	0.94
chrXI:551480:551680:+@chrXI:552003:552244:+@annotated	0.63	0.59	0.67	0.63	0.67	0.66	1	1	0.47	0.51	0.43	0.47	0.34	0.5	0.41	0.38	0.58	0.94	NA	0.88	NA	0.88	0.79	0.75	0.68	0.63
chrIV:307133:307333:-@chrIV:307766:307966:-@annotated	0.06	0.04	0.07	0.08	0.09	0.08	0.97	0.98	0.04	0.3	0.07	0.15	0.25	0.04	0.22	0.2	0.15	0.24	0.36	NA	NA	0.33	0.35	0.47	0.09	0.05
chrVII:920464:920664:+@chrVII:921120:921330:+@annotated	0.42	0.4	0.42	0.4	0.38	0.41	0.79	0.79	0.53	0.5	0.44	0.54	0.52	0.46	0.55	0.5	0.55	0.61	0.48	NA	NA	0.34	0.74	0.33	0.52	0.59
chrXVI:412061:412261:+@chrXVI:413013:413213:+@annotated	0.99	1	0.99	1	0.99	1	1	1	0.97	0.98	0.99	0.98	0.96	0.96	0.94	0.9	0.95	0.85	0.91	0.83	0.67	NA	NA	0.98	0.98	0.98
chrV:158794:158994:-@chrV:159088:159288:-@annotated	0.16	0.15	0.19	0.22	0.19	0.21	0.19	0.18	0.24	0.19	0.21	0.14	0.19	0.16	0.23	0.26	0.2	0.08	0.03	0.13	0.11	0.26	0.17	0.17	0.22	0.25
chrII:170420:170620:+@chrII:170758:171005:+@novel	1	1	1	1	0.99	0.99	0.99	0.99	0.97	0.99	0.99	0.99	0.99	0.99	0.97	0.98	0.99	0.99	0.99	0.99	1	0.99	0.99	0.98	0.98	0.98
chrXII:855677:855877:+@chrXII:856428:856628:+@novel	0.27	0.32	0.27	0.24	0.48	0.45	0.37	0.34	0.47	0.74	0.46	0.75	0.98	0.16	0.29	0.43	0.38	0.38	0.61	NA	NA	0.59	0.94	0.94	0.79	0.61
chrXII:242121:242321:+@chrXII:242691:243363:+@A3SS	1	1	1	1	1	1	1	1	1	0.99	1	1	1	1	0.99	1	1	0.99	0.99	0.97	0.98	0.99	0.99	0.99	1	1
chrVII:438897:439097:+@chrVII:439324:439524:+@A5SS	0.63	0.64	0.65	0.62	0.71	0.72	0.99	1	0.76	0.71	0.83	0.79	0.81	0.85	0.81	0.67	0.78	0.89	NA	NA	NA	0.76	0.76	0.78	0.67	0.82
chrVIII:107631:107831:+@chrVIII:107895:108095:+@annotated	0.26	0.36	0.26	0.44	0.37	0.34	NA	NA	0.1	0.17	NA	0.08	0.07	0.06	0.08	0.07	0.1	NA	NA	NA	NA	0.2	0.15	0.22	NA	0.16
chrXII:244185:244385:-@chrXII:245150:245350:-@novel	1	1	1	1	1	1	0.98	0.99	0.97	0.99	0.99	0.93	0.97	0.99	0.99	1	1	1	1	1	1	1	1	0.99	0.98	0.97
chrVII:167154:167354:+@chrVII:167995:168195:+@annotated	0.63	0.58	0.5	0.58	0.59	0.62	1	1	0.71	0.84	0.82	0.6	0.78	0.38	0.26	0.25	0.25	0.39	0.37	0.47	0.49	0.7	0.43	0.77	0.69	0.64
chrIV:431186:431386:-@chrIV:431473:431673:-@annotated	0.31	0.39	0.34	0.51	0.5	0.52	0.22	0.18	0.21	0.29	0.32	0.28	0.28	0.19	0.15	0.07	0.17	0.1	0.05	0.05	0.05	0.27	0.19	0.35	0.29	0.24
chrXIV:728354:728554:+@chrXIV:728922:729122:+@novel	1	0.99	0.99	0.99	0.99	0.98	0.99	0.99	1	0.99	0.99	0.99	0.99	0.98	0.97	0.99	0.99	0.98	0.96	0.99	0.99	0.99	0.99	0.99	0.99	1
chrVII:435479:435679:+@chrVII:435750:435950:+@annotated	NA	NA	NA	NA	NA	NA	NA	NA	NA	NA	NA	NA	NA	0.63	0.54	0.87	0.62	0.74	0.37	NA	NA	NA	NA	NA	NA	NA
chrVII:543438:543638:+@chrVII:543722:543922:+@annotated	0.58	0.77	0.73	0.7	0.94	0.91	0.22	0.21	0.34	0.27	0.2	0.3	0.28	NA	0.39	NA	0.6	NA	NA	NA	NA	0.94	NA	0.26	NA	NA
chrXII:250660:250860:-@chrXII:250948:251148:-@annotated	NA	NA	NA	NA	0.92	0.92	NA	NA	NA	NA	NA	NA	NA	NA	NA	NA	NA	0.22	0.21	0.14	0.15	0.16	0.13	NA	NA	NA
chrII:366302:366502:-@chrII:366585:366785:-@annotated	0.68	0.71	0.91	0.77	0.89	0.71	0.72	0.56	0.82	0.65	NA	NA	0.32	0.23	0.36	0.34	0.44	0.98	0.83	0.96	0.98	0.99	0.98	0.74	NA	NA
chrV:269551:269751:-@chrV:270149:270349:-@annotated	0.07	0.05	0.09	0.08	0.1	0.11	1	1	0.04	0.23	0.05	0.22	0.24	0.08	0.29	0.31	0.3	0.68	0.48	0.86	0.92	0.47	0.41	0.51	0.08	0.05
chrII:606080:606280:+@chrII:606669:606869:+@annotated	0.06	0.05	0.07	0.08	0.1	0.1	0.92	0.91	0.06	0.32	0.07	0.24	0.37	0.05	0.24	0.11	0.09	NA	0.2	NA	NA	0.33	0.19	0.33	0.07	0.05
chrIII:106833:107033:+@chrIII:107305:107505:+@A3SS	0.73	0.6	0.65	0.62	0.71	0.61	0.73	0.79	0.75	0.71	0.8	0.73	0.74	0.62	0.7	0.69	0.7	0.41	0.38	0.42	0.4	0.5	0.52	0.81	0.63	0.6
chrV:348001:348201:-@chrV:348277:348487:-@annotated	0.45	0.39	0.45	0.48	0.54	0.27	0.38	0.37	0.39	NA	0.51	NA	0.29	0.19	0.36	0.15	0.18	NA	NA	NA	NA	0.66	0.73	NA	NA	NA
chrIV:629705:629905:+@chrIV:630174:630374:+@annotated	0.17	0.18	0.23	0.24	0.27	0.24	0.37	0.35	0.44	0.25	0.31	0.32	0.33	0.29	0.35	0.25	0.26	0.43	0.4	0.58	0.36	0.61	0.52	0.3	0.31	0.5
chrXV:911885:912085:-@chrXV:912433:912633:-@annotated	0.98	0.99	0.98	0.98	1	1	0.98	0.98	NA	0.88	0.88	NA	NA	NA	NA	NA	0.81	0.9	0.96	0.89	0.9	0.94	0.84	0.88	0.89	NA
chrIV:1406792:1406992:+@chrIV:1407232:1407432:+@novel	0.96	0.98	0.98	0.94	0.98	0.99	0.99	1	0.83	0.68	0.91	0.9	0.8	0.8	0.93	0.93	0.93	0.94	0.94	0.73	0.79	0.91	0.87	0.79	0.85	NA
chrIV:1355036:1355236:-@chrIV:1355551:1355751:-@annotated	0.11	0.07	0.16	0.14	0.18	0.18	0.97	0.98	0.1	0.58	0.19	0.31	0.54	0.12	0.29	0.3	0.24	NA	NA	NA	NA	0.26	0.45	0.66	0.15	0.09
chrXVI:794829:795029:+@chrXVI:795395:795595:+@annotated	0.13	0.12	0.11	0.11	0.13	0.12	0.88	0.87	0.07	0.15	0.08	0.11	0.14	0.07	0.1	0.08	0.06	0.07	0.08	0.07	0.07	0.18	0.17	0.22	0.11	0.09
chrXVI:29340:29540:+@chrXVI:29659:29859:+@novel	0.96	0.98	0.97	0.98	0.98	0.99	0.96	0.97	NA	0.96	0.92	NA	0.86	0.96	0.94	0.92	0.95	NA	NA	NA	NA	0.92	NA	0.89	0.89	NA
chrII:170476:170676:+@chrII:170805:171005:+@annotated	0.18	0.2	0.24	0.21	0.23	0.23	0.49	0.44	0.41	0.37	0.33	0.33	0.48	0.24	NA	0.29	0.15	NA	0.12	0.12	0.1	0.27	0.17	0.33	0.37	0.32
chrX:156589:156789:-@chrX:157250:157450:-@annotated	0.04	0.03	0.08	0.13	0.08	0.07	1	1	0.02	0.1	0.03	0.12	0.14	0.04	0.11	0.19	0.22	0.16	0.23	NA	0.29	0.39	0.26	0.21	0.05	0.01
chrVII:439181:439381:+@chrVII:439480:439680:+@novel	1	1	1	1	1	1	1	1	1	1	1	1	1	1	0.99	0.99	1	0.98	0.95	0.93	0.94	0.99	0.99	1	1	1
chrVII:726838:727038:+@chrVII:727358:727558:+@annotated	0.03	0.03	0.08	0.07	0.06	0.05	0.98	0.98	0.04	0.09	0.07	0.12	0.21	0.02	0.13	0.07	0.04	0.11	0.1	0.19	NA	0.36	0.4	0.11	0.07	0.03
chrXII:281227:281427:-@chrXII:281629:281829:-@novel	1	0.99	1	0.99	1	1	0.99	0.99	0.99	0.98	0.99	0.98	0.99	0.9	NA	0.93	0.9	NA	NA	NA	NA	0.97	0.97	0.97	0.99	0.98
chrXV:505737:505937:+@chrXV:505996:506539:+@A3SS	1	1	1	1	1	1	0.93	0.9	1	1	1	1	1	1	0.99	0.99	1	0.98	0.99	0.98	0.97	0.99	0.99	0.99	1	1
chrXVI:911076:911276:+@chrXVI:911353:911553:+@annotated	0.14	0.12	0.18	0.18	0.21	0.18	0.21	0.29	0.27	0.26	0.25	0.19	0.24	0.21	NA	0.24	0.37	NA	NA	NA	NA	0.49	0.35	0.37	0.26	0.27
chrVII:249686:249886:+@chrVII:250087:250287:+@annotated	0.09	0.18	0.17	0.2	0.16	0.21	0.39	0.52	0.24	0.1	0.16	0.14	0.14	0.22	0.17	0.21	0.23	NA	NA	NA	NA	0.7	NA	0.11	0.14	0.13
chrXI:618174:618374:-@chrXI:618743:618943:-@annotated	0.37	0.36	0.73	0.7	0.54	0.51	1	1	0.54	0.76	0.76	0.81	0.88	0.51	0.89	0.79	0.75	NA	NA	NA	NA	0.64	0.85	0.88	0.77	0.43
chrII:679742:679942:-@chrII:680040:680240:-@annotated	0.22	0.34	0.22	0.33	0.22	0.3	0.22	0.18	0.15	0.17	0.14	0.07	0.08	0.08	0.09	0.09	0.09	0.11	0.08	0.06	0.1	0.19	0.23	0.14	0.15	0.19
chrVIII:129328:129528:+@chrVIII:129648:129848:+@annotated	0.12	0.13	0.17	0.23	0.14	0.14	NA	NA	NA	NA	NA	NA	NA	NA	NA	NA	NA	NA	NA	NA	NA	NA	NA	NA	NA	NA
chrIV:601163:601363:-@chrIV:601518:601718:-@novel	1	1	1	1	1	1	1	1	1	1	1	1	1	1	1	1	1	1	1	1	1	1	1	1	1	1
chrVII:1084682:1084882:+@chrVII:1085031:1085231:+@annotated	0.72	0.58	0.6	0.69	0.47	0.54	0.84	0.93	0.4	0.4	0.68	NA	0.35	0.33	0.22	0.32	0.22	0.27	0.32	0.29	0.16	0.13	0.35	0.22	0.59	NA
chrXII:242121:242321:+@chrXII:242827:243363:+@A3SS	0.98	0.98	0.99	0.97	0.97	0.97	1	1	1	0.99	0.99	1	1	0.99	0.99	0.99	0.99	0.97	0.99	0.97	0.97	0.98	0.98	0.99	1	1
chrXIV:62172:62372:-@chrXIV:62924:63124:-@annotated	0.11	0.08	0.13	0.1	0.13	0.12	0.99	0.98	0.09	0.34	0.1	0.22	0.23	0.08	0.21	0.14	0.18	NA	0.15	0.47	NA	0.37	0.54	0.52	0.15	0.08
chrV:468041:468241:+@chrV:468388:468588:+@novel	0.98	0.99	0.99	0.99	0.99	1	0.93	0.9	NA	0.87	0.82	0.8	0.71	0.87	0.95	0.88	0.96	0.82	0.77	0.83	0.73	0.91	0.85	0.89	0.92	NA
chrIV:457817:458017:-@chrIV:458098:458298:-@annotated	0.4	0.32	0.26	0.5	0.22	0.21	0.68	0.72	0.89	0.6	0.65	NA	NA	0.12	0.14	0.2	0.2	NA	NA	NA	NA	0.46	0.48	0.42	NA	NA
chrXII:3715:3915:-@chrXII:4015:4215:-@annotated	0.99	0.99	0.98	0.98	0.99	0.99	0.99	1	0.91	0.99	0.99	0.94	0.68	0.68	0.75	0.79	0.87	0.88	0.77	0.88	0.95	0.89	0.62	0.99	0.99	0.94
chrVII:365326:365526:-@chrVII:365986:366186:-@annotated	0.15	0.16	0.29	0.46	0.2	0.17	0.99	0.99	0.2	0.7	0.26	0.67	0.77	0.31	0.55	0.41	0.23	0.51	0.46	NA	NA	0.57	0.66	0.86	0.3	0.23
chrII:565550:565750:+@chrII:566936:567136:+@novel	0.99	0.98	0.99	0.98	0.99	0.99	0.96	0.97	0.97	0.98	0.97	0.96	0.97	0.98	0.97	0.97	0.96	0.99	0.99	0.99	0.99	0.99	0.99	0.97	0.98	0.97
chrXII:694182:694382:+@chrXII:694473:694673:+@annotated	0.28	NA	0.34	0.35	0.23	0.32	NA	NA	NA	NA	NA	NA	NA	NA	NA	NA	NA	NA	NA	NA	NA	NA	NA	NA	NA	NA
chrIX:23243:23443:+@chrIX:23765:23965:+@novel	0.99	1	0.99	1	0.99	0.99	1	1	1	1	1	1	1	1	1	1	1	1	1	1	1	1	1	1	0.99	1
chrXIII:337617:337817:+@chrXIII:337904:338104:+@annotated	0.28	0.29	0.43	0.27	0.3	0.32	0.43	0.36	0.39	0.47	0.36	0.52	NA	0.39	NA	0.32	0.47	NA	NA	NA	NA	0.63	NA	NA	0.47	0.29
chrXV:92240:92440:-@chrXV:92831:93031:-@annotated	0.08	0.05	0.09	0.09	0.14	0.11	1	1	0.04	0.2	0.07	0.12	0.14	0.02	0.18	0.07	0.07	NA	NA	NA	NA	0.3	NA	0.28	0.08	0.04
chrIV:1401600:1401800:+@chrIV:1402185:1402385:+@annotated	0.16	0.1	0.16	0.13	0.3	0.25	0.99	0.99	0.09	0.36	0.15	0.2	0.31	0.13	0.36	0.25	0.23	0.32	0.29	NA	NA	0.51	0.36	0.38	0.16	0.09
chrIX:155022:155222:+@chrIX:155311:155511:+@annotated	0.46	0.23	0.53	0.36	0.63	0.54	0.43	0.36	0.63	0.19	0.29	0.21	0.33	0.16	NA	0.18	0.13	0.17	0.14	0.12	0.14	0.22	0.16	0.17	0.27	0.52
chrXII:898348:898548:+@chrXII:898646:898846:+@novel	0.2	0.16	0.31	0.22	0.34	0.34	1	1	0.2	0.59	0.21	0.36	0.42	0.26	0.36	0.44	0.42	NA	NA	NA	NA	NA	NA	0.67	0.28	0.22
chrII:186152:186352:-@chrII:186428:186628:-@annotated	0.39	0.4	0.34	0.32	0.46	0.44	0.43	0.63	0.76	0.85	0.86	NA	0.84	0.87	0.92	0.89	0.77	NA	NA	NA	NA	0.82	NA	0.62	0.75	0.82
chrVIII:298160:298360:-@chrVIII:298485:298685:-@annotated	0.11	0.12	NA	0.15	0.22	0.14	NA	0.28	NA	0.19	NA	0.12	0.12	0.17	0.18	NA	0.12	0.11	0.11	NA	0.11	0.26	0.29	0.25	NA	NA
chrXII:327058:327258:-@chrXII:327400:327600:-@annotated	0.2	0.16	0.34	0.29	0.31	0.26	0.32	0.41	0.39	0.15	0.41	0.16	0.13	0.1	0.16	NA	0.17	0.16	0.1	0.09	0.08	0.1	0.07	0.27	0.24	0.45
chrXIII:499678:499878:-@chrXIII:500152:500352:-@annotated	0.09	0.07	0.08	0.08	0.08	0.08	1	1	0.07	0.11	0.07	0.12	0.2	0.08	0.24	0.1	0.13	NA	0.1	NA	NA	0.25	0.33	0.16	0.07	0.07
chrII:392980:393180:+@chrII:393511:393870:+@annotated	0.66	0.61	0.62	0.65	0.6	0.63	1	1	0.56	0.57	0.55	0.62	0.76	0.57	0.71	0.68	0.66	0.77	0.88	0.84	0.7	0.74	0.83	0.59	0.6	0.57
chrIV:1359769:1359969:+@chrIV:1360405:1360605:+@annotated	0.06	0.07	0.08	0.07	0.08	0.07	0.99	0.99	0.12	0.18	0.13	0.19	0.26	0.14	0.22	0.22	0.15	0.15	0.21	NA	0.23	0.23	NA	0.21	0.12	0.1
chrXIV:282424:282624:-@chrXIV:282685:283005:-@novel	1	1	1	1	1	1	1	0.99	0.97	1	0.99	0.97	0.97	0.98	0.97	0.96	0.94	0.97	0.95	0.97	0.95	0.96	0.97	1	1	0.97
chrXIII:3591:3791:-@chrXIII:3891:4091:-@annotated	0.99	0.98	0.96	0.97	0.98	0.98	0.99	0.99	NA	0.98	0.98	NA	NA	0.29	0.35	0.3	0.39	NA	NA	NA	NA	NA	NA	0.99	0.98	NA
chrIX:231757:231957:-@chrIX:232367:232567:-@annotated	0.06	0.04	0.09	0.07	0.12	0.1	0.96	0.96	0.03	0.19	0.07	0.19	0.21	0.03	0.21	0.12	0.11	NA	NA	NA	NA	0.28	0.25	0.24	0.08	0.03
chrVII:946120:946320:+@chrVII:946421:946621:+@A5SS	NA	NA	NA	NA	NA	0.93	NA	NA	NA	NA	NA	NA	NA	0.92	0.96	0.98	0.92	0.99	0.96	0.98	0.99	0.99	0.96	NA	NA	NA
chrIV:1103609:1103809:+@chrIV:1103893:1104093:+@annotated	0.45	0.52	0.63	0.66	0.56	0.44	NA	NA	NA	NA	NA	NA	NA	NA	NA	NA	NA	NA	NA	NA	NA	NA	NA	NA	NA	NA
chrXIII:732265:732465:+@chrXIII:732876:733076:+@annotated	0.05	0.04	0.1	0.1	0.09	0.08	1	1	0.07	0.15	0.08	0.16	0.16	0.06	0.12	0.12	0.12	0.13	NA	NA	NA	0.13	0.1	0.15	0.09	0.07
chrXII:456244:456444:-@chrXII:465583:467636:-@novel	1	0.96	1	0.98	1	1	1	0.96	1	1	1	0.79	0.46	0.57	0.5	0.55	0.75	1	1	1	1	1	1	1	1	1
chrXII:982258:982458:-@chrXII:982539:982739:-@novel	0.68	0.77	0.34	0.62	0.7	0.87	NA	0.47	NA	NA	NA	NA	NA	NA	NA	0.77	NA	NA	NA	0.82	NA	NA	NA	NA	NA	NA
chrIV:267525:267725:+@chrIV:267807:268007:+@annotated	0.38	0.23	0.39	0.34	0.48	0.49	0.41	NA	0.53	0.38	0.33	NA	NA	NA	NA	0.29	0.67	0.25	0.55	0.22	0.2	NA	0.74	0.57	0.43	NA
chrII:414553:414753:-@chrII:415260:415460:-@annotated	0.07	0.08	0.11	0.16	0.16	0.14	0.99	0.99	0.04	0.33	0.07	0.17	0.24	0.03	0.09	0.07	0.06	0.06	0.04	0.13	NA	0.29	0.16	0.45	0.09	0.04
chrVII:937012:937212:+@chrVII:937321:937536:+@novel	0.99	0.99	0.99	0.99	1	1	0.99	0.98	0.97	0.99	0.98	0.99	0.98	0.99	0.99	0.97	0.99	0.97	0.98	0.96	0.92	0.97	0.96	0.98	0.98	0.97
chrV:548352:548552:+@chrV:548645:548845:+@annotated	0.95	0.98	0.96	0.98	0.98	0.99	NA	NA	NA	0.91	NA	NA	NA	0.13	0.12	0.12	0.15	0.16	NA	NA	NA	NA	NA	NA	NA	NA
chrXIII:517363:517563:+@chrXIII:517886:518086:+@annotated	0.08	0.15	0.33	0.97	0.16	0.08	1	1	0.34	0.43	0.37	0.34	0.41	0.21	0.31	0.27	0.24	0.24	0.18	0.15	0.19	0.24	0.2	0.29	0.19	0.3
chrI:87187:87387:+@chrI:87501:87701:+@annotated	0.13	0.22	0.17	0.29	0.21	0.17	0.19	0.19	0.23	0.17	0.21	0.19	0.13	0.19	0.18	0.14	0.19	0.12	0.14	0.12	0.11	0.12	0.22	0.21	0.2	0.18
chrIV:417021:417221:-@chrIV:417627:417827:-@novel	0.32	0.29	0.53	0.47	0.38	0.47	0.87	0.72	0.19	0.09	0.16	0.21	0.16	0.26	0.39	0.48	0.46	0.66	0.65	0.42	0.31	0.39	0.35	0.16	0.23	0.27
chrXVI:716849:717049:-@chrXVI:717147:717347:-@novel	0.99	1	0.99	0.99	0.99	0.99	0.96	0.98	0.98	0.96	0.98	0.98	0.96	0.98	0.97	0.99	0.98	0.92	0.9	0.92	0.96	0.98	0.97	0.97	0.98	0.97
chrIV:306605:306805:-@chrIV:307074:307274:-@novel	1	1	1	1	1	1	1	1	1	0.97	1	1	0.99	0.99	0.94	0.97	0.97	0.9	0.85	0.91	0.73	0.86	0.87	0.98	1	1
chrIV:121877:122077:+@chrIV:122187:122402:+@novel	0.73	0.76	0.89	0.95	0.87	0.93	0.84	0.94	0.94	0.91	0.82	NA	NA	0.87	NA	0.91	0.79	NA	NA	NA	NA	0.95	0.91	0.87	0.95	0.88
chrVII:156999:157199:-@chrVII:157283:157483:-@annotated	NA	NA	NA	NA	NA	NA	NA	NA	NA	NA	NA	NA	NA	0.47	0.4	0.52	0.45	NA	NA	NA	NA	0.96	0.95	NA	NA	NA
chrXVI:377795:377995:-@chrXVI:378390:378590:-@annotated	0.03	0.03	0.05	0.05	0.05	0.04	0.92	0.9	0.03	0.15	0.04	0.14	0.15	0.04	0.1	0.08	0.07	0.17	0.33	0.12	0.23	0.2	0.21	0.25	0.05	0.04
chrXIV:185291:185491:+@chrXIV:185587:185787:+@annotated	0.42	0.27	0.38	0.37	0.37	0.26	0.78	0.66	0.48	0.66	0.51	0.45	0.51	NA	NA	NA	0.14	NA	NA	NA	NA	0.66	0.83	NA	0.59	0.43
chrX:399992:400192:+@chrX:400256:400510:+@novel	0.98	0.98	0.98	0.96	0.97	0.98	0.95	0.98	0.83	0.99	0.94	0.92	0.93	0.95	0.92	0.94	0.96	NA	0.92	0.94	0.97	0.91	0.93	0.97	0.97	0.88
chrXII:712525:712725:-@chrXII:713156:713356:-@annotated	0.08	0.08	0.2	0.24	0.16	0.15	0.91	0.95	0.03	0.07	0.06	0.04	0.05	0.02	0.05	0.05	0.05	0.02	0.03	0.02	0.02	0.02	0.01	0.12	0.07	0.03
chrXII:242121:242321:+@chrXII:242776:243363:+@A3SS	1	1	1	1	1	1	1	1	1	0.99	1	1	1	1	0.99	0.99	0.99	0.98	0.88	0.98	0.97	0.98	0.96	0.99	1	1
chrVI:221067:221267:-@chrVI:221415:221615:-@annotated	0.1	0.08	0.13	0.11	0.23	0.19	0.09	0.07	0.06	0.18	0.06	0.2	0.26	NA	NA	0.22	0.34	NA	NA	NA	NA	0.72	0.54	0.47	0.13	0.08
chrXIV:283523:283723:+@chrXIV:283806:284009:+@novel	NA	NA	NA	NA	NA	NA	NA	NA	NA	NA	NA	NA	NA	NA	NA	NA	NA	0.86	NA	NA	NA	0.91	NA	NA	NA	NA
chrIV:217402:217602:+@chrIV:218008:218208:+@annotated	0.03	0.03	0.08	0.13	0.09	0.09	1	1	0.02	0.06	0.03	0.1	0.11	0.02	0.07	0.05	0.04	NA	NA	NA	NA	0.19	0.1	0.14	0.05	0.02
chrXVI:582358:582558:-@chrXVI:582702:583289:-@annotated	0.43	0.52	0.65	0.57	0.56	0.66	0.92	0.84	0.43	0.81	0.88	0.07	0.08	0.16	0.08	0.1	0.08	0.31	0.09	0.21	0.24	0.26	0.25	0.74	0.94	0.49
chrV:423624:423824:+@chrV:423952:424152:+@novel	0.14	0.11	0.22	0.18	0.28	0.25	1	0.99	0.1	0.47	0.14	0.24	0.31	NA	0.33	NA	NA	NA	NA	NA	NA	0.85	NA	0.9	0.18	0.11
chrX:435027:435227:+@chrX:435344:435544:+@annotated	0.1	0.09	0.14	0.16	0.32	0.28	0.16	0.14	0.12	0.08	0.09	0.09	0.05	0.08	0.05	0.06	0.07	0.05	0.06	0.04	0.03	0.09	0.09	0.09	0.1	0.11
chrVI:241809:242009:+@chrVI:242082:242282:+@annotated	0.81	0.73	0.67	0.87	0.71	0.69	0.63	0.69	NA	0.59	NA	NA	0.45	NA	NA	NA	NA	NA	NA	NA	NA	0.58	0.77	NA	NA	NA
chrXII:550258:550458:-@chrXII:550575:550775:-@annotated	0.37	0.33	0.5	0.43	0.47	0.35	0.69	0.81	0.44	0.39	0.45	0.59	NA	0.57	0.38	0.57	0.52	0.78	0.88	0.76	0.55	0.96	0.96	0.67	0.51	0.47
chrVIII:103417:103617:-@chrVIII:103857:104057:-@novel	0.98	0.98	0.98	0.99	0.99	1	1	1	0.99	1	0.99	0.99	0.99	1	0.99	0.99	0.99	0.98	0.98	0.98	0.98	0.97	0.99	0.98	0.99	0.98
chrVIII:382106:382306:-@chrVIII:382748:382948:-@annotated	0.06	0.07	0.14	0.17	0.11	0.11	0.86	0.86	0.07	0.12	0.08	0.14	0.23	0.08	0.11	0.11	0.09	0.15	0.1	NA	0.22	0.18	0.15	0.23	0.07	0.06
chrI:150806:151006:-@chrI:151097:151297:-@annotated	NA	NA	NA	NA	NA	NA	0.66	NA	NA	0.41	NA	NA	NA	0.44	0.42	NA	0.55	NA	NA	0.49	0.48	0.91	0.69	NA	NA	NA
chrIV:169150:169350:+@chrIV:169602:169802:+@novel	1	1	1	1	1	1	0.99	0.99	0.98	0.99	0.99	0.98	0.99	0.99	0.98	0.98	0.99	0.96	0.99	0.99	0.97	0.98	0.99	0.99	0.98	0.98
chrXIII:559582:559782:+@chrXIII:560158:560358:+@novel	0.29	0.3	0.34	0.34	0.41	0.39	0.72	0.58	0.39	0.28	0.31	0.22	0.26	0.17	0.17	0.17	0.17	0.18	0.18	0.21	0.22	0.36	0.37	0.35	0.47	0.36
chrX:365584:365784:+@chrX:365903:366103:+@annotated	0.22	0.19	0.16	0.22	0.19	0.13	0.11	0.17	0.13	0.14	0.14	0.17	0.19	0.06	0.14	0.27	0.22	NA	NA	NA	NA	0.46	0.4	0.11	0.13	0.28
chrXIII:666733:666933:-@chrXIII:667018:667218:-@annotated	0.66	0.3	0.69	0.75	0.47	0.65	0.63	0.73	NA	0.52	NA	NA	0.37	0.33	0.36	0.3	0.36	NA	NA	NA	NA	0.93	NA	NA	NA	NA
chrXVI:492718:492918:-@chrXVI:493021:493221:-@annotated	0.32	0.16	0.39	0.27	0.46	0.31	0.42	0.49	0.28	0.23	0.46	NA	NA	0.29	0.32	0.26	0.43	NA	NA	NA	NA	NA	NA	0.35	0.52	NA
chrXV:296475:296675:+@chrXV:297193:297393:+@novel	0.95	0.97	0.93	0.97	0.97	0.99	0.94	0.94	NA	0.94	0.9	0.9	0.9	0.88	0.85	0.93	0.92	0.92	0.99	0.94	0.91	0.98	0.99	0.84	0.94	0.92
chrVII:61931:62131:+@chrVII:62197:62415:+@A3SS	0.98	0.96	0.98	0.98	0.88	0.95	0.92	0.96	0.97	0.82	0.94	0.97	0.94	0.94	NA	0.79	0.85	NA	0.95	NA	NA	NA	0.95	NA	0.89	0.93
chrXII:787494:787694:+@chrXII:788229:788429:+@novel	1	1	1	1	1	1	1	0.99	0.99	1	0.99	1	0.99	1	1	0.99	1	1	1	0.99	0.99	0.99	1	0.99	0.99	0.99
chrIX:4398:4598:-@chrIX:4987:5187:-@annotated	0.98	0.94	0.98	0.95	0.99	0.98	0.99	0.99	0.84	0.96	0.92	0.88	0.87	0.92	0.95	0.95	0.97	0.92	0.98	0.99	0.97	0.99	0.99	0.96	0.93	0.95
chrIV:1329546:1329746:+@chrIV:1329816:1330073:+@novel	1	1	1	1	1	0.99	0.99	0.99	0.99	0.99	0.99	0.99	0.99	1	0.99	0.99	1	0.99	0.99	1	0.99	1	0.99	0.99	0.98	0.98
chrIV:655003:655203:+@chrIV:655273:655473:+@novel	1	1	1	1	1	1	0.99	0.97	0.98	0.99	0.99	0.98	0.98	0.99	0.99	1	0.99	0.98	0.99	0.99	0.98	0.99	0.99	1	0.99	0.98
chrXIII:720998:721198:-@chrXIII:721346:721546:-@annotated	0.32	0.33	0.34	0.47	0.57	0.55	0.32	0.31	0.31	0.34	0.25	0.18	0.23	0.22	0.22	0.28	0.18	NA	0.37	NA	NA	0.4	NA	0.38	0.4	0.17
chrXIV:557374:557574:+@chrXIV:557685:557899:+@A5SS	0.99	0.99	0.99	0.99	0.99	0.99	0.96	0.98	0.97	0.96	0.98	0.96	0.94	0.97	0.97	0.97	0.98	NA	NA	NA	0.9	0.97	0.96	0.96	0.96	0.97
chrV:307756:307956:+@chrV:308068:308268:+@annotated	0.12	0.18	0.27	0.35	0.13	0.14	0.17	0.2	NA	0.13	0.15	NA	0.09	NA	0.08	0.07	0.07	NA	NA	NA	NA	NA	0.16	NA	0.15	NA
chrXVI:271103:271303:+@chrXVI:271897:272097:+@novel	1	1	1	1	1	1	0.99	0.98	0.98	0.99	0.99	0.99	0.99	1	0.99	0.99	0.99	0.99	0.99	1	1	1	1	0.99	0.98	0.98
chrXIII:424797:424997:+@chrXIII:425154:425354:+@annotated	0.12	0.12	0.14	0.14	0.13	0.2	0.13	0.13	0.07	NA	0.14	NA	NA	NA	NA	NA	NA	0.03	0.05	0.03	0.04	0.1	0.06	0.12	0.07	NA
chrXII:28262:28462:-@chrXII:28835:29035:-@novel	0.93	0.94	0.95	0.95	0.97	0.97	0.98	0.99	0.95	0.95	0.95	0.98	0.96	0.9	0.88	0.9	0.95	0.87	0.9	0.9	0.76	0.96	0.92	0.97	0.93	0.84
chrV:369220:369420:-@chrV:369489:369689:-@novel	0.99	0.98	0.98	0.98	0.99	0.98	0.98	0.97	0.99	0.98	0.97	0.97	0.94	0.97	0.97	0.98	0.99	0.99	1	1	0.99	0.98	0.99	0.98	0.98	0.99
chrVII:61931:62131:+@chrVII:62190:62415:+@annotated	0.42	0.51	0.68	0.63	0.67	0.65	0.67	0.66	0.62	0.72	0.63	0.69	0.44	0.51	NA	0.55	0.51	NA	0.53	NA	NA	NA	0.86	NA	0.62	0.68
chrVIII:104205:104405:+@chrVIII:104804:105004:+@annotated	0.08	0.07	0.09	0.1	0.14	0.12	1	1	0.02	0.11	0.06	0.12	0.17	0.03	0.08	0.06	0.04	NA	NA	NA	NA	0.23	0.21	0.15	0.07	0.02
chrII:110220:110420:-@chrII:110506:110706:-@annotated	0.14	0.17	0.2	0.24	0.15	0.18	0.18	0.2	0.12	0.08	0.19	0.12	0.11	0.12	0.14	0.1	0.09	0.17	0.13	NA	0.19	0.59	0.27	0.07	0.18	0.14
chrXVI:305106:305306:+@chrXVI:305412:305612:+@annotated	0.23	0.18	0.35	0.3	0.38	0.43	0.32	0.33	0.36	0.49	0.37	NA	NA	NA	NA	0.21	NA	NA	0.23	0.19	0.12	0.77	0.5	0.44	0.43	0.21
chrVI:203092:203292:-@chrVI:203387:203587:-@annotated	0.41	0.34	0.45	0.38	0.35	0.4	0.16	0.22	NA	0.12	NA	NA	0.3	NA	NA	0.29	0.19	NA	NA	NA	NA	NA	NA	0.14	NA	NA
chrXIII:557628:557828:-@chrXIII:558002:558202:-@novel	1	1	1	1	1	1	1	0.99	1	0.99	1	0.99	0.98	0.99	0.96	0.98	0.98	0.99	0.98	0.98	0.98	0.97	0.94	0.99	0.99	0.99
chrXIV:557410:557610:+@chrXIV:557685:557899:+@annotated	0.5	0.54	0.55	0.52	0.48	0.46	0.81	0.68	0.52	0.71	0.6	0.56	0.54	0.76	0.63	0.59	0.77	NA	NA	NA	NA	0.67	0.7	0.78	0.68	0.58
chrXII:931149:931349:-@chrXII:931699:931899:-@annotated	0.03	0.03	0.05	0.05	0.06	0.06	1	1	0.05	0.46	0.09	0.16	0.33	0.03	0.19	0.08	0.04	0.09	0.09	NA	NA	0.43	0.61	0.58	0.08	0.04
chrXII:398332:398532:+@chrXII:398627:398827:+@annotated	NA	0.31	NA	0.5	0.56	NA	NA	NA	NA	NA	NA	NA	NA	NA	NA	NA	NA	0.72	0.53	0.6	0.74	NA	0.81	NA	NA	NA
chrXII:9250:9450:-@chrXII:9550:9750:-@annotated	0.99	0.99	0.98	0.98	0.98	0.99	1	0.99	0.92	0.99	0.99	0.94	0.65	0.71	0.75	0.8	0.86	0.91	0.78	0.9	0.94	0.91	0.64	0.98	0.99	0.92
chrV:131576:131776:+@chrV:131900:132100:+@annotated	0.13	0.15	0.22	0.27	0.22	0.18	NA	NA	NA	0.19	NA	0.15	0.11	0.14	0.1	0.13	0.17	NA	NA	0.23	0.19	0.3	0.19	0.37	NA	NA
chrIV:491359:491559:+@chrIV:491899:492099:+@annotated	0.05	0.04	0.06	0.04	0.07	0.06	0.94	0.93	0.04	0.24	0.05	0.17	0.22	0.05	0.27	0.1	0.11	0.14	NA	NA	NA	0.18	0.28	0.42	0.07	0.04
chrXVI:303361:303561:+@chrXVI:303625:303825:+@novel	1	1	1	1	1	1	1	1	1	1	1	1	1	1	1	1	1	0.99	1	0.99	0.99	0.99	0.98	0.99	1	1
chrXVI:883187:883387:+@chrXVI:883487:883687:+@annotated	0.11	0.09	0.12	0.09	0.16	0.12	0.16	0.17	0.14	0.19	0.15	0.11	0.12	0.11	0.18	0.12	0.12	0.18	0.33	NA	NA	0.28	0.27	0.23	0.24	0.11
chrIV:1319417:1319617:-@chrIV:1319698:1319898:-@annotated	0.37	0.45	0.78	0.86	0.38	0.55	0.45	0.44	0.33	0.19	0.25	NA	NA	0.15	0.23	0.17	0.24	NA	0.16	NA	0.2	NA	NA	0.46	0.35	0.46
chrXIV:443626:443826:-@chrXIV:444172:444372:-@annotated	0.08	0.09	0.1	0.17	0.13	0.13	0.99	0.99	0.08	0.19	0.09	0.27	0.31	0.07	0.36	0.13	0.14	0.24	0.22	0.19	0.2	0.67	0.63	0.29	0.12	0.06
chrVIII:525903:526103:-@chrVIII:526207:526407:-@novel	0.93	0.96	0.98	0.91	0.96	0.98	0.95	0.94	NA	0.96	0.91	0.96	0.94	0.97	0.98	0.97	0.96	0.94	0.98	0.94	0.95	0.99	0.94	0.94	0.95	NA
chrI:128314:128514:-@chrI:129022:129222:-@novel	0.98	1	0.99	1	1	1	1	1	1	1	1	0.99	1	1	0.99	1	1	0.99	0.99	1	1	1	1	0.99	0.99	0.99
chrXV:678179:678379:-@chrXV:678791:678991:-@annotated	0.03	0.03	0.08	0.07	0.09	0.08	0.95	0.95	0.02	0.06	0.04	0.05	0.05	0.02	0.05	0.02	0.03	0.04	NA	NA	NA	0.05	NA	0.15	0.05	0.03
chrXVI:218446:218646:+@chrXVI:218747:218947:+@annotated	0.75	0.79	0.65	0.64	0.83	0.9	0.86	0.68	0.64	0.6	0.67	NA	NA	NA	NA	NA	NA	0.36	0.32	0.45	0.32	0.61	0.76	0.81	0.76	NA
chrXIV:721570:721770:-@chrXIV:722303:722503:-@annotated	0.04	0.17	0.14	0.7	0.06	0.06	1	1	0.99	1	1	0.99	1	1	1	1	1	1	1	1	1	1	1	1	1	1
chrXII:1024372:1024572:+@chrXII:1024655:1024855:+@annotated	NA	NA	0.9	NA	0.94	0.86	NA	NA	NA	NA	NA	NA	NA	0.12	0.12	0.13	0.11	0.07	0.06	0.17	NA	0.94	0.92	NA	NA	NA
chrIX:23556:23756:-@chrIX:23865:24065:-@novel	0.99	1	0.99	0.99	0.99	0.99	1	0.99	NA	1	0.99	NA	NA	NA	NA	NA	NA	NA	NA	NA	NA	NA	NA	1	0.99	NA
chrXV:349297:349497:-@chrXV:349599:349799:-@novel	0.97	0.98	0.98	0.98	0.96	0.97	0.88	0.91	NA	0.71	0.81	NA	NA	0.84	0.92	0.95	0.99	0.9	0.89	0.95	0.92	0.92	0.92	0.88	0.89	NA
chrVI:63659:63859:-@chrVI:63974:64174:-@annotated	0.27	0.15	0.35	0.28	0.4	0.2	0.92	0.69	0.95	0.63	0.87	NA	NA	NA	NA	NA	0.86	NA	NA	NA	NA	0.81	NA	0.89	0.85	0.84
chrIII:101433:101633:-@chrIII:101701:101901:-@annotated	0.18	0.22	0.24	0.2	0.23	0.14	0.18	0.3	0.33	0.29	NA	0.21	0.2	0.26	0.25	0.23	0.19	NA	NA	NA	NA	0.23	0.23	0.43	0.32	0.13
chrXVI:95953:96153:-@chrXVI:96234:96434:-@annotated	0.51	0.55	0.61	0.72	0.87	0.81	0.45	0.4	0.64	0.5	0.44	NA	NA	0.32	0.35	0.65	0.34	0.5	0.21	0.39	0.15	0.91	0.81	0.64	NA	NA
chrXII:986941:987141:+@chrXII:987222:987550:+@A3SS	0.99	0.99	0.99	0.99	0.99	1	0.98	0.96	0.98	0.97	0.99	0.96	0.97	0.98	0.96	0.98	0.98	0.97	0.97	0.97	0.97	0.92	0.96	0.98	0.98	0.97
chrV:239423:239623:-@chrV:239712:239912:-@annotated	NA	NA	NA	NA	0.94	0.97	NA	NA	NA	0.92	NA	NA	NA	0.45	0.4	0.45	0.47	NA	0.79	NA	NA	NA	0.75	NA	NA	NA
chrIV:1212677:1212877:+@chrIV:1212979:1213179:+@annotated	0.28	0.28	0.25	0.27	0.34	0.34	0.17	0.13	0.13	NA	0.14	NA	NA	NA	NA	0.33	0.25	0.17	0.15	NA	0.2	NA	NA	NA	NA	0.22
chrI:142053:142253:+@chrI:142620:142820:+@annotated	0.06	0.08	0.08	0.32	0.07	0.05	0.97	0.97	0.1	0.11	0.08	0.13	0.22	0.09	0.16	0.15	0.17	0.11	0.1	0.08	0.13	0.09	0.07	0.17	0.06	0.12
chrII:59993:60193:-@chrII:60698:60898:-@annotated	0.05	0.04	0.05	0.05	0.07	0.06	0.62	0.68	0.07	0.14	0.05	0.15	0.21	0.14	0.25	0.25	0.23	0.27	0.58	0.29	0.5	0.46	0.41	0.26	0.08	0.07
chrVII:859060:859260:-@chrVII:859474:859674:-@annotated	0.26	0.37	0.33	0.46	0.45	0.4	1	1	0.34	0.28	0.47	0.2	0.19	0.2	0.23	0.18	0.19	0.26	0.28	0.31	0.3	0.3	0.34	0.32	0.44	0.31
chrXIII:139890:140090:-@chrXIII:140184:140384:-@annotated	0.14	0.22	0.25	0.31	0.44	0.28	NA	NA	0.18	NA	NA	NA	NA	NA	NA	NA	NA	NA	NA	NA	NA	0.3	NA	NA	NA	NA
chrXII:286267:286467:-@chrXII:286557:286757:-@annotated	0.34	0.27	0.33	0.38	0.46	0.34	0.44	0.37	0.39	0.32	0.43	0.3	0.2	0.3	NA	0.27	0.34	NA	NA	NA	NA	0.9	0.68	0.54	0.28	NA
chrII:601903:602103:+@chrII:602217:602417:+@annotated	0.98	0.95	0.98	0.98	0.99	0.99	0.94	0.89	NA	NA	0.92	NA	NA	0.21	0.2	0.22	0.22	NA	0.3	NA	NA	NA	0.87	NA	NA	NA
chrIV:215957:216157:+@chrIV:216513:216722:+@novel	0.69	0.69	0.8	0.91	0.8	0.78	1	1	0.55	0.67	0.57	0.72	0.44	0.81	0.8	0.56	0.83	0.98	0.97	0.95	0.97	0.96	0.88	0.89	0.95	0.9
chrXIV:144949:145149:-@chrXIV:145255:145455:-@annotated	0.12	0.19	0.18	0.13	0.18	0.26	NA	NA	NA	NA	NA	NA	NA	NA	NA	NA	NA	NA	NA	NA	NA	NA	NA	NA	NA	NA
chrII:426316:426516:-@chrII:426874:427074:-@annotated	0.71	0.76	0.75	0.76	0.86	0.87	1	1	0.98	0.97	0.98	0.97	0.96	0.98	0.97	0.97	0.97	0.98	0.99	0.99	0.99	1	0.99	0.99	0.94	0.94
chrVII:682748:682948:-@chrVII:683066:683266:-@novel	0.98	0.98	0.98	0.96	0.98	0.98	0.97	0.97	0.98	0.98	0.98	0.95	0.96	0.99	0.99	0.99	0.99	0.99	1	1	1	0.98	0.99	0.97	0.98	0.98
chrIII:294039:294239:+@chrIII:294292:294492:+@annotated	NA	NA	NA	NA	NA	NA	NA	NA	NA	NA	NA	NA	0.51	NA	NA	0.27	0.17	NA	NA	NA	NA	NA	NA	NA	NA	NA
chrIV:427266:427466:+@chrIV:427575:427775:+@novel	0.19	0.2	0.27	0.26	0.23	0.26	0.99	1	1	0.98	1	0.97	0.99	0.98	0.81	0.94	0.94	NA	0.92	NA	NA	0.99	0.98	0.93	0.99	1
chrXIV:282424:282624:-@chrXIV:282760:283005:-@novel	1	1	1	1	1	1	1	1	1	1	1	1	1	1	0.99	0.99	0.99	0.99	0.99	1	0.99	1	1	1	1	0.99
chrXI:625701:625901:+@chrXI:625977:626187:+@annotated	0.68	0.7	0.7	0.68	0.67	0.68	0.82	0.53	0.51	0.83	0.81	0.48	0.48	0.47	0.46	0.45	0.56	NA	NA	0.65	0.6	NA	NA	0.88	NA	0.63
chrVIII:1697:1897:-@chrVIII:2671:2871:-@annotated	1	0.99	1	0.99	1	1	0.99	0.99	1	0.99	0.99	0.99	1	1	1	1	1	1	1	1	1	1	1	0.99	0.99	1
chrXVI:623377:623577:+@chrXVI:623711:623911:+@annotated	0.1	0.1	0.1	0.1	0.08	0.09	0.25	0.27	0.23	0.13	0.14	0.15	0.38	0.22	0.13	NA	0.08	NA	NA	NA	NA	0.12	0.16	0.08	0.1	0.18
chrXI:437637:437837:+@chrXI:437914:438126:+@A3SS	0.94	0.92	0.97	0.97	0.92	0.93	0.97	0.97	0.96	0.96	0.95	0.96	0.97	0.98	0.94	0.97	0.99	NA	0.93	0.92	0.95	0.97	0.96	0.97	0.96	0.94
chrVI:54177:54377:-@chrVI:54687:54887:-@annotated	0.02	0.04	0.04	0.08	0.04	0.03	0.7	0.98	0.05	0.04	0.05	0.06	0.09	0.05	0.05	0.07	0.07	0.06	0.07	0.06	0.08	0.08	0.11	0.05	0.04	0.05
chrVI:223240:223440:-@chrVI:223728:223928:-@novel	0.18	0.14	0.21	0.16	0.22	0.2	0.99	0.97	0.17	0.34	0.17	0.31	0.37	0.12	0.53	0.22	0.27	0.31	0.51	0.16	0.24	0.43	0.43	0.45	0.24	0.17
chrIX:316571:316771:+@chrIX:317172:317372:+@annotated	0.05	0.05	0.07	0.08	0.13	0.1	1	1	0.04	0.21	0.05	0.23	0.31	0.05	0.15	0.18	0.09	NA	NA	NA	NA	0.18	0.27	0.37	0.08	0.05
chrX:73596:73796:+@chrX:74205:74405:+@annotated	0.27	0.56	0.59	0.75	0.61	0.54	0.97	0.98	0.2	0.75	0.28	0.54	0.6	0.17	0.27	0.22	0.21	0.33	0.14	0.38	0.28	0.59	0.46	0.91	0.5	0.3
chrXII:1028668:1028868:+@chrXII:1029253:1029453:+@annotated	0.15	0.11	0.21	0.61	0.21	0.15	0.96	0.95	0.05	0.26	0.08	0.25	0.51	0.08	0.24	0.11	0.12	NA	NA	NA	NA	0.61	0.45	0.48	0.12	0.06
chrXIV:62161:62361:-@chrXIV:62924:63124:-@A3SS	0.99	1	1	1	1	1	1	1	0.98	0.95	0.99	0.98	0.99	0.98	0.97	0.97	0.95	0.89	0.98	0.89	NA	0.88	NA	0.93	0.97	0.98
chrXII:40021:40221:-@chrXII:40401:40601:-@annotated	0.08	0.1	0.1	0.15	0.19	0.17	0.15	0.14	0.15	0.12	0.12	0.13	0.15	0.14	0.13	0.14	0.15	0.17	0.14	0.14	0.16	0.22	0.21	0.1	0.13	0.15
chrXIV:48093:48293:+@chrXIV:48402:48602:+@annotated	0.16	0.16	0.21	0.18	0.27	0.23	0.17	0.26	0.37	NA	NA	NA	NA	0.13	0.13	0.17	0.16	NA	0.32	NA	NA	0.46	NA	NA	NA	NA
chrXII:452765:452965:-@chrXII:462104:467636:-@novel	0.63	0.72	0.65	0.68	0.76	0.66	1	0.98	1	1	1	1	1	1	1	1	1	1	1	1	1	1	1	1	1	1
chrXIII:82090:82290:+@chrXIII:82374:82574:+@annotated	0.25	0.2	0.31	0.21	0.3	0.37	0.36	0.36	0.29	NA	0.33	NA	0.32	NA	NA	NA	0.23	0.18	0.24	NA	NA	NA	NA	0.78	0.39	0.29
chrVII:534273:534473:-@chrVII:534782:534982:-@novel	0.09	0.08	0.12	0.16	0.12	0.11	1	1	0.08	0.14	0.1	0.13	0.14	0.06	0.17	0.07	0.1	0.06	0.07	NA	NA	0.16	0.08	0.17	0.1	0.09
chrIII:172915:173115:-@chrIII:173199:173399:-@annotated	0.2	0.23	0.26	0.24	0.23	0.23	0.21	0.21	0.24	0.22	0.22	0.25	0.24	0.25	0.26	0.24	0.22	0.2	0.14	0.16	0.18	0.21	0.18	0.19	0.24	0.25
chrXV:93643:93843:-@chrXV:94291:94491:-@annotated	0.02	0.02	0.03	0.02	0.04	0.03	0.07	0.07	0.03	0.11	0.04	0.17	0.27	0.03	0.07	0.06	0.07	NA	NA	NA	NA	0.18	NA	0.2	0.04	0.03
chrXVI:243289:243489:-@chrXVI:244026:244226:-@novel	0.99	0.99	1	0.99	1	0.99	0.99	0.99	0.99	0.99	0.99	0.96	0.98	0.98	0.98	0.99	0.99	0.98	0.98	0.98	0.98	0.96	0.97	0.97	0.99	0.99
chrXI:447506:447706:-@chrXI:447811:448011:-@annotated	0.32	0.21	0.43	0.46	0.37	0.31	NA	NA	NA	NA	NA	NA	NA	NA	NA	NA	NA	NA	NA	0.1	0.14	NA	NA	NA	NA	NA
chrXIII:163108:163308:-@chrXIII:163717:163917:-@annotated	0.05	0.07	0.09	0.14	0.06	0.05	0.99	0.99	0.1	0.24	0.14	0.29	0.4	NA	0.8	0.16	0.19	NA	NA	NA	NA	0.7	0.41	0.37	0.14	0.12
chrXV:552465:552665:-@chrXV:552875:553075:-@annotated	0.1	0.13	0.13	0.19	0.26	0.24	0.42	0.73	0.09	0.08	0.08	0.08	0.1	0.08	0.1	0.11	0.11	0.11	0.09	0.08	0.1	0.26	0.27	0.1	0.09	0.1
chrII:3916:4116:-@chrII:4216:4416:-@annotated	0.99	0.99	0.99	0.99	0.99	0.99	0.99	0.99	0.75	0.99	0.99	0.82	0.53	0.48	0.57	0.57	0.63	0.92	0.69	0.8	0.91	0.73	0.45	0.99	0.99	0.92
chrII:124954:125154:+@chrII:125271:125471:+@annotated	0.09	0.1	0.11	0.14	0.18	0.13	0.2	0.19	0.19	0.13	0.11	0.13	0.13	0.14	0.07	0.13	0.12	0.09	0.11	0.09	0.07	0.33	0.26	0.1	0.2	0.17
chrIV:1329525:1329725:+@chrIV:1329816:1330073:+@novel	1	1	1	1	0.99	0.99	1	1	1	1	1	1	1	1	1	1	1	1	1	1	0.99	1	0.99	0.99	0.99	1
chrXII:548477:548677:-@chrXII:548764:548964:-@annotated	0.35	0.26	0.39	0.52	0.47	0.39	NA	NA	NA	NA	NA	NA	NA	NA	NA	0.5	NA	NA	NA	NA	NA	0.86	NA	NA	NA	NA
chrIV:715047:715247:-@chrIV:715359:715559:-@annotated	0.25	0.39	0.29	0.37	0.21	0.18	0.17	0.17	0.24	0.08	0.12	0.16	0.14	0.17	0.21	0.16	0.18	NA	NA	NA	NA	0.63	0.45	0.15	0.11	0.24
chrXIII:225039:225239:-@chrXIII:225339:225539:-@annotated	0.36	0.26	0.45	0.23	0.52	0.35	0.39	0.72	0.39	0.45	0.79	NA	NA	NA	NA	NA	NA	0.14	0.18	0.12	0.12	0.53	0.5	NA	0.7	NA
chrX:702598:702798:-@chrX:703055:703255:-@annotated	0.04	0.04	0.09	0.49	0.08	0.06	0.98	1	0.04	0.17	0.06	0.09	0.14	0.03	0.11	NA	0.07	NA	NA	NA	NA	0.3	NA	0.35	0.09	0.04
chrIII:177706:177906:-@chrIII:178214:178414:-@annotated	0.03	0.03	0.06	0.06	0.07	0.07	1	1	0.02	0.07	0.03	0.09	0.15	0.02	0.15	0.05	0.05	NA	NA	NA	NA	0.11	0.06	0.14	0.04	0.02
chrII:392980:393180:+@chrII:393508:393870:+@A3SS	0.95	0.95	0.93	0.94	0.95	0.92	1	1	0.96	0.97	0.97	0.98	0.94	0.98	0.97	0.96	0.95	0.88	0.95	0.86	0.87	0.88	0.87	0.99	0.95	0.96
chrIX:225609:225809:-@chrIX:225900:226100:-@annotated	NA	NA	NA	NA	0.88	0.94	NA	NA	NA	NA	NA	NA	NA	0.36	0.33	0.25	0.27	0.63	0.69	0.91	0.83	0.97	0.95	NA	NA	NA
chrXVI:673548:673748:+@chrXVI:674377:674577:+@novel	1	1	1	1	0.99	0.99	1	0.99	1	1	1	0.99	0.99	1	0.99	1	1	0.99	0.99	0.97	0.97	0.99	0.99	1	0.99	0.99
chrIX:166234:166434:+@chrIX:166520:166720:+@annotated	0.43	0.33	0.29	0.55	0.61	0.43	NA	NA	NA	NA	NA	NA	NA	NA	NA	NA	NA	NA	0.34	0.18	0.23	0.88	NA	NA	NA	NA
chrXVI:729185:729385:-@chrXVI:729482:729682:-@annotated	0.06	0.19	0.18	0.3	0.22	0.17	0.2	0.19	NA	0.08	NA	0.07	0.08	0.14	0.14	0.09	0.13	NA	NA	NA	NA	0.27	NA	0.18	NA	NA
chrXIII:551751:551951:+@chrXIII:552508:552711:+@A3SS	0.89	0.9	0.95	0.91	0.9	0.93	1	1	0.69	0.6	0.67	0.84	0.92	0.85	0.65	0.84	0.71	0.89	NA	NA	0.91	0.9	0.91	0.79	0.7	0.78
chrXII:263005:263205:+@chrXII:263595:263795:+@annotated	0.12	0.11	0.28	0.28	0.58	0.44	1	1	0.05	0.15	0.05	0.26	0.21	0.04	0.17	0.14	0.18	0.23	NA	NA	NA	0.2	NA	0.32	0.09	0.07
chrXIV:534674:534874:-@chrXIV:534966:535166:-@annotated	0.25	0.23	0.39	NA	0.54	0.39	NA	NA	NA	NA	NA	NA	NA	NA	NA	NA	NA	NA	NA	NA	NA	NA	NA	NA	NA	NA
chrVIII:354664:354864:+@chrVIII:354956:355156:+@annotated	0.28	0.34	0.38	0.38	0.53	0.39	NA	NA	0.34	0.23	NA	NA	NA	0.52	0.86	0.88	0.89	0.94	0.97	0.95	0.96	0.88	0.87	0.31	0.37	0.56
chrII:406827:407027:-@chrII:407123:407323:-@annotated	0.09	0.09	0.07	0.09	0.08	0.07	0.21	0.22	0.19	0.21	0.21	0.25	0.34	0.18	0.22	0.23	0.18	NA	0.34	NA	NA	NA	NA	0.22	0.21	0.19
chrIII:111357:111557:-@chrIII:111634:111834:-@annotated	0.94	0.86	0.93	0.89	0.91	0.89	0.88	0.9	0.73	0.85	0.88	0.72	0.91	0.71	0.91	0.74	0.84	NA	NA	NA	NA	0.75	0.72	0.81	0.92	0.75
chrXII:856374:856574:+@chrXII:857058:857258:+@annotated	0.42	0.37	0.62	0.99	0.36	0.47	1	1	0.83	1	0.97	1	1	1	1	1	1	0.97	0.91	0.99	0.98	0.73	0.88	1	0.7	0.74
chrIV:308227:308427:+@chrIV:308793:308993:+@annotated	0.06	0.06	0.11	0.13	0.12	0.12	1	1	0.06	0.31	0.09	0.21	0.37	0.11	0.63	0.17	0.22	NA	NA	NA	NA	0.62	0.43	0.51	0.11	0.08
chrXIV:63818:64018:-@chrXIV:64451:64651:-@annotated	0.16	0.19	0.35	0.52	0.21	0.22	1	1	0.2	0.53	0.17	0.93	0.63	0.19	0.48	0.38	0.3	0.57	0.48	0.69	0.73	0.75	0.58	0.9	0.27	0.27
chrXII:986941:987141:+@chrXII:987213:987550:+@annotated	0.94	0.92	0.93	0.95	0.94	0.97	0.91	0.86	0.95	0.88	0.95	0.95	0.97	0.93	0.9	0.89	0.89	0.66	0.97	0.92	0.81	0.92	0.97	0.94	0.96	0.96
chrX:75738:75938:+@chrX:76325:76525:+@annotated	0.04	0.02	0.09	0.11	0.08	0.08	1	1	0.02	0.19	0.04	0.13	0.11	0.01	0.08	0.04	0.04	0.06	0.17	NA	NA	0.22	0.17	0.26	0.09	0.03
chrXV:866949:867149:+@chrXV:867587:867787:+@annotated	0.08	0.06	0.07	0.06	0.07	0.06	1	1	0.08	0.43	0.11	0.16	0.26	0.06	0.15	0.13	0.09	0.12	NA	NA	NA	0.23	0.3	0.48	0.1	0.07
chrXV:373699:373899:+@chrXV:374123:374323:+@novel	0.98	0.99	0.98	0.9	0.96	0.99	0.97	0.96	0.94	0.97	0.95	0.97	0.96	0.94	0.97	0.97	0.97	0.91	0.92	0.94	0.96	0.97	0.96	0.96	0.94	0.96
chrV:307546:307746:+@chrV:307849:308049:+@annotated	0.15	0.18	0.18	0.18	0.17	0.17	0.4	0.47	0.3	0.28	0.33	0.15	0.19	0.12	0.18	0.21	0.18	NA	0.12	NA	NA	0.25	NA	0.21	0.25	0.25
chrXIV:282424:282624:-@chrXIV:282745:283005:-@novel	1	1	1	1	1	1	1	1	1	1	1	1	1	1	0.99	0.98	0.99	0.99	0.99	0.99	0.99	1	1	1	1	1
chrXVI:833493:833693:+@chrXVI:833828:834028:+@annotated	0.89	0.59	0.8	0.71	0.67	0.57	0.86	0.97	0.87	0.89	0.9	NA	0.78	NA	NA	NA	NA	0.43	0.83	0.47	0.67	0.96	0.96	NA	0.81	0.93
chrXV:423457:423657:-@chrXV:423735:423935:-@novel	0.99	1	0.99	0.99	1	0.99	0.98	0.98	0.99	0.98	0.97	0.99	0.99	0.99	0.98	0.99	0.99	0.94	0.94	0.96	0.96	0.97	0.96	0.97	0.97	0.99
chrXII:233442:233642:-@chrXII:233886:234086:-@novel	1	1	1	1	1	1	1	1	1	1	1	1	1	0.99	0.99	0.99	0.98	0.99	1	0.98	0.98	0.98	0.97	1	1	1
chrX:396293:396493:-@chrX:396571:396771:-@annotated	0.19	0.27	0.37	0.23	0.35	0.34	NA	NA	NA	NA	NA	NA	NA	0.16	0.12	0.11	0.11	NA	0.16	NA	NA	NA	NA	NA	NA	NA
chrXVI:5640:5840:-@chrXVI:5989:6189:-@annotated	0.73	0.58	0.61	0.69	0.47	0.54	0.84	0.93	0.4	0.4	0.69	NA	0.35	0.33	0.22	0.32	0.22	0.27	0.32	0.29	0.16	0.13	0.35	0.23	0.58	NA
chrIV:322082:322282:+@chrIV:322704:322904:+@annotated	0.01	0.01	0.03	0.06	0.02	0.02	0.84	0.86	0.01	0.07	0.02	0.05	0.06	0.01	0.04	0.02	0.01	0.05	0.05	NA	NA	0.07	0.06	0.14	0.03	0.01
chrVII:31226:31426:-@chrVII:31579:31779:-@annotated	NA	NA	NA	NA	NA	NA	NA	NA	NA	NA	NA	NA	0.91	0.9	0.82	0.62	0.62	0.57	0.77	0.84	0.82	0.97	0.99	NA	NA	NA
chrXI:155071:155271:+@chrXI:155637:155855:+@A3SS	0.69	0.66	0.6	0.92	0.86	0.95	1	1	0.65	0.63	0.66	0.62	0.7	0.62	0.45	0.59	0.55	0.97	0.99	0.77	0.84	0.57	0.59	0.71	0.72	0.65
chrV:166571:166771:-@chrV:166875:167075:-@annotated	0.16	0.19	0.18	0.22	0.19	0.23	0.51	0.34	0.45	0.38	0.29	0.32	0.46	NA	NA	NA	NA	NA	NA	NA	NA	NA	NA	NA	NA	0.43
chrXI:437637:437837:+@chrXI:437906:438126:+@annotated	0.67	0.79	0.71	0.84	0.89	0.72	0.77	0.85	0.85	0.71	0.56	0.57	0.47	0.67	0.7	0.55	0.52	NA	0.67	0.64	0.62	0.84	0.75	0.79	0.87	0.74
chrII:726717:726917:-@chrII:727012:727212:-@annotated	0.7	0.4	0.59	0.52	0.59	0.73	0.82	0.87	NA	0.65	0.89	NA	NA	0.29	NA	0.15	0.16	0.48	0.46	0.3	0.25	0.32	0.32	0.73	0.62	0.82
chrXII:564254:564454:-@chrXII:564514:564714:-@annotated	0.68	0.62	NA	NA	0.65	0.64	NA	NA	NA	NA	NA	NA	NA	0.6	0.59	0.51	0.58	NA	0.51	0.68	NA	0.9	0.78	0.42	NA	NA
chrXI:93166:93366:-@chrXI:93466:93666:-@novel	0.41	0.52	0.61	0.62	0.7	0.53	0.58	0.59	0.28	0.79	0.51	0.72	0.57	0.79	0.88	0.66	0.57	NA	NA	0.62	NA	0.59	NA	0.86	NA	0.63
